# Supplementary material for: Identification of Multiple Stress Responsive Genes by Sequencing a Normalized cDNA Library from Sea-Land Cotton (Gossypium barbadense L.)
Source: PLoS One. 2016 Mar 31;11(3):e0152927. doi: 10.1371/journal.pone.0152927 (PMC4816313; doi:10.1371/journal.pone.0152927)
Supplement: S8 Table — S8-1: Summary of GO function categories of all uniESTs; the three GO categories biological process (level 4) (S8-2), molecular function (level 4) (S8-3), and cellular component (level 4) (S8-4) are presented. (XLSX) [file pone.0152927.s010.xlsx]

## Sheet: S8-1 Summary
Parameter	Value
Total number of uniESTs	3135
Number of uniESTs classified in more than 1 ontologies	2678
Number of uniESTs classified in 3 ontologies	1286
Number of uniESTs for molecular function	1810
Number of uniESTs for biological process	1885
Number of uniESTs for cellular component	1722

## Sheet: S8-2 Biological process
GO-id	GO-term	Score
GO:0043170	macromolecule metabolic process	873
GO:1901576	organic substance biosynthetic process	750
GO:0044249	cellular biosynthetic process	704
GO:1901360	organic cyclic compound metabolic process	566
GO:0044281	small molecule metabolic process	548
GO:0034641	cellular nitrogen compound metabolic process	522
GO:0006725	cellular aromatic compound metabolic process	522
GO:0046483	heterocycle metabolic process	508
GO:1901564	organonitrogen compound metabolic process	431
GO:0044711	single-organism biosynthetic process	415
GO:0006810	transport	392
GO:0050794	regulation of cellular process	379
GO:0006793	phosphorus metabolic process	357
GO:0055114	oxidation-reduction process	321
GO:1901575	organic substance catabolic process	297
GO:0051716	cellular response to stimulus	283
GO:0010035	response to inorganic substance	267
GO:0007275	multicellular organismal development	257
GO:0019222	regulation of metabolic process	249
GO:0005975	carbohydrate metabolic process	246
GO:0044712	single-organism catabolic process	236
GO:1901700	response to oxygen-containing compound	231
GO:0010033	response to organic substance	223
GO:0044248	cellular catabolic process	215
GO:0007154	cell communication	198
GO:0022613	ribonucleoprotein complex biogenesis	193
GO:0006996	organelle organization	188
GO:0006629	lipid metabolic process	185
GO:1901135	carbohydrate derivative metabolic process	184
GO:0006091	generation of precursor metabolites and energy	155
GO:0006952	defense response	154
GO:0006970	response to osmotic stress	153
GO:0051707	response to other organism	151
GO:0009266	response to temperature stimulus	143
GO:0051649	establishment of localization in cell	140
GO:0003006	developmental process involved in reproduction	131
GO:0008104	protein localization	128
GO:0044702	single organism reproductive process	117
GO:0051186	cofactor metabolic process	112
GO:0009314	response to radiation	109
GO:0022607	cellular component assembly	108
GO:0070727	cellular macromolecule localization	107
GO:0043933	macromolecular complex subunit organization	107
GO:0009653	anatomical structure morphogenesis	106
GO:1901657	glycosyl compound metabolic process	100
GO:0070271	protein complex biogenesis	99
GO:0006790	sulfur compound metabolic process	96
GO:0006979	response to oxidative stress	96
GO:0015979	photosynthesis	92
GO:0071495	cellular response to endogenous stimulus	78
GO:0048869	cellular developmental process	78
GO:0048519	negative regulation of biological process	74
GO:0048583	regulation of response to stimulus	74
GO:1901615	organic hydroxy compound metabolic process	72
GO:0048518	positive regulation of biological process	69
GO:0009888	tissue development	68
GO:0019748	secondary metabolic process	60
GO:0010817	regulation of hormone levels	60
GO:1901698	response to nitrogen compound	59
GO:0050793	regulation of developmental process	59
GO:0051239	regulation of multicellular organismal process	56
GO:0061024	membrane organization	56
GO:0045229	external encapsulating structure organization	54
GO:0042592	homeostatic process	52
GO:0006081	cellular aldehyde metabolic process	51
GO:0016049	cell growth	48
GO:0042440	pigment metabolic process	46
GO:0048589	developmental growth	43
GO:0080167	response to karrikin	40
GO:0007049	cell cycle	38
GO:1902580	single-organism cellular localization	37
GO:0009611	response to wounding	37
GO:0008219	cell death	37
GO:0023051	regulation of signaling	33
GO:0072593	reactive oxygen species metabolic process	32
GO:0071669	plant-type cell wall organization or biogenesis	30
GO:2000241	regulation of reproductive process	30
GO:0044093	positive regulation of molecular function	29
GO:0010876	lipid localization	29
GO:0002682	regulation of immune system process	28
GO:0042546	cell wall biogenesis	27
GO:0021700	developmental maturation	27
GO:0009991	response to extracellular stimulus	27
GO:0071496	cellular response to external stimulus	24
GO:0015977	carbon fixation	24
GO:0048609	multicellular organismal reproductive process	22
GO:0051301	cell division	21
GO:0009812	flavonoid metabolic process	21
GO:0032879	regulation of localization	18
GO:0007017	microtubule-based process	17
GO:0007568	aging	17
GO:0040008	regulation of growth	16
GO:0051128	regulation of cellular component organization	15
GO:0043900	regulation of multi-organism process	14
GO:0035383	thioester metabolic process	14
GO:1900673	olefin metabolic process	12
GO:0044703	multi-organism reproductive process	12
GO:0030029	actin filament-based process	12
GO:0010118	stomatal movement	12
GO:0044092	negative regulation of molecular function	12
GO:0051640	organelle localization	11
GO:0045730	respiratory burst	11
GO:0090066	regulation of anatomical structure size	11
GO:0043476	pigment accumulation	11
GO:0009595	detection of biotic stimulus	10
GO:0006928	cellular component movement	10
GO:0044403	symbiosis, encompassing mutualism through parasitism	10
GO:0009612	response to mechanical stimulus	9
GO:0009629	response to gravity	9
GO:0009410	response to xenobiotic stimulus	9
GO:0046685	response to arsenic-containing substance	9
GO:0051235	maintenance of location	8
GO:0009606	tropism	8
GO:0009581	detection of external stimulus	8
GO:0009582	detection of abiotic stimulus	7
GO:0035821	modification of morphology or physiology of other organism	7
GO:0070482	response to oxygen levels	7
GO:0009292	genetic transfer	6
GO:0033037	polysaccharide localization	6
GO:0009593	detection of chemical stimulus	6
GO:0042493	response to drug	5
GO:0009636	response to toxic substance	4
GO:0044087	regulation of cellular component biogenesis	4
GO:0007059	chromosome segregation	4
GO:0007155	cell adhesion	3
GO:0006403	RNA localization	3
GO:0017144	drug metabolic process	3
GO:0010025	wax biosynthetic process	3
GO:0022412	cellular process involved in reproduction in multicellular organism	3
GO:0071941	nitrogen cycle metabolic process	2
GO:0043446	cellular alkane metabolic process	2
GO:0010191	mucilage metabolic process	2
GO:0022411	cellular component disassembly	2
GO:0050817	coagulation	2
GO:0050878	regulation of body fluid levels	2
GO:0042752	regulation of circadian rhythm	2
GO:0051705	multi-organism behavior	1
GO:0034330	cell junction organization	1
GO:0035265	organ growth	1
GO:0010098	suspensor development	1
GO:0097438	exit from dormancy	1
GO:0009268	response to pH	1
GO:0006808	regulation of nitrogen utilization	1
GO:0042330	taxis	1
GO:0022406	membrane docking	1
GO:0009726	detection of endogenous stimulus	1
GO:0071461	cellular response to redox state	1
GO:1901568	fatty acid derivative metabolic process	1
GO:0008037	cell recognition	1
GO:0001887	selenium compound metabolic process	1
GO:0061061	muscle structure development	1
GO:0035264	multicellular organism growth	1
GO:0043062	extracellular structure organization	1
GO:0097437	maintenance of dormancy	1

## Sheet: S8-3 Molecular function
GO-id	GO-term	Score
GO:1901265	nucleoside phosphate binding	410
GO:0043169	cation binding	407
GO:0043168	anion binding	327
GO:0003676	nucleic acid binding	301
GO:0001882	nucleoside binding	269
GO:0016772	transferase activity, transferring phosphorus-containing groups	142
GO:0022891	substrate-specific transmembrane transporter activity	104
GO:0016817	hydrolase activity, acting on acid anhydrides	91
GO:0016788	hydrolase activity, acting on ester bonds	86
GO:0008233	peptidase activity	74
GO:0016614	oxidoreductase activity, acting on CH-OH group of donors	58
GO:0022804	active transmembrane transporter activity	57
GO:0050662	coenzyme binding	56
GO:0016627	oxidoreductase activity, acting on the CH-CH group of donors	54
GO:0046906	tetrapyrrole binding	54
GO:0016879	ligase activity, forming carbon-nitrogen bonds	53
GO:0016746	transferase activity, transferring acyl groups	46
GO:0016757	transferase activity, transferring glycosyl groups	46
GO:0016741	transferase activity, transferring one-carbon groups	45
GO:0016705	oxidoreductase activity, acting on paired donors, with incorporation or reduction of molecular oxygen	45
GO:0016798	hydrolase activity, acting on glycosyl bonds	37
GO:0046983	protein dimerization activity	36
GO:0004497	monooxygenase activity	29
GO:0051082	unfolded protein binding	29
GO:0016835	carbon-oxygen lyase activity	28
GO:0016667	oxidoreductase activity, acting on a sulfur group of donors	25
GO:0042802	identical protein binding	24
GO:0016684	oxidoreductase activity, acting on peroxide as acceptor	23
GO:0016651	oxidoreductase activity, acting on NAD(P)H	23
GO:0016830	carbon-carbon lyase activity	22
GO:0051213	dioxygenase activity	22
GO:0016903	oxidoreductase activity, acting on the aldehyde or oxo group of donors	21
GO:0008092	cytoskeletal protein binding	20
GO:0051536	iron-sulfur cluster binding	20
GO:0016765	transferase activity, transferring alkyl or aryl (other than methyl) groups	20
GO:0019899	enzyme binding	19
GO:0043177	organic acid binding	19
GO:0031072	heat shock protein binding	15
GO:0022803	passive transmembrane transporter activity	15
GO:0016860	intramolecular oxidoreductase activity	14
GO:0016846	carbon-sulfur lyase activity	14
GO:1901677	phosphate transmembrane transporter activity	14
GO:0008565	protein transporter activity	13
GO:0016859	cis-trans isomerase activity	13
GO:0016229	steroid dehydrogenase activity	13
GO:0016875	ligase activity, forming carbon-oxygen bonds	12
GO:0017171	serine hydrolase activity	12
GO:0016810	hydrolase activity, acting on carbon-nitrogen (but not peptide) bonds	11
GO:0016769	transferase activity, transferring nitrogenous groups	11
GO:0016701	oxidoreductase activity, acting on single donors with incorporation of molecular oxygen	11
GO:0005057	receptor signaling protein activity	11
GO:0016877	ligase activity, forming carbon-sulfur bonds	10
GO:0016854	racemase and epimerase activity	9
GO:0016679	oxidoreductase activity, acting on diphenols and related substances as donors	8
GO:0019904	protein domain specific binding	8
GO:0016782	transferase activity, transferring sulfur-containing groups	8
GO:0019842	vitamin binding	7
GO:0042277	peptide binding	7
GO:0005516	calmodulin binding	7
GO:0030695	GTPase regulator activity	7
GO:0016721	oxidoreductase activity, acting on superoxide radicals as acceptor	7
GO:0048029	monosaccharide binding	6
GO:0016638	oxidoreductase activity, acting on the CH-NH2 group of donors	6
GO:0043178	alcohol binding	6
GO:0016645	oxidoreductase activity, acting on the CH-NH group of donors	6
GO:0038023	signaling receptor activity	6
GO:0015238	drug transmembrane transporter activity	5
GO:0016744	transferase activity, transferring aldehyde or ketonic groups	5
GO:0016675	oxidoreductase activity, acting on a heme group of donors	4
GO:0015002	heme-copper terminal oxidase activity	4
GO:0030247	polysaccharide binding	4
GO:0016866	intramolecular transferase activity	4
GO:0005484	SNAP receptor activity	4
GO:0016840	carbon-nitrogen lyase activity	4
GO:0003712	transcription cofactor activity	3
GO:0030414	peptidase inhibitor activity	3
GO:0019213	deacetylase activity	3
GO:0061135	endopeptidase regulator activity	3
GO:0016872	intramolecular lyase activity	3
GO:0051087	chaperone binding	3
GO:0015604	organic phosphonate transmembrane transporter activity	3
GO:0032403	protein complex binding	3
GO:0005496	steroid binding	3
GO:0005102	receptor binding	3
GO:0030611	arsenate reductase activity	3
GO:0000156	phosphorelay response regulator activity	2
GO:0046863	ribulose-1,5-bisphosphate carboxylase/oxygenase activator activity	2
GO:0019888	protein phosphatase regulator activity	2
GO:0016661	oxidoreductase activity, acting on other nitrogenous compounds as donors	2
GO:0043022	ribosome binding	2
GO:0010011	auxin binding	2
GO:0005527	macrolide binding	2
GO:0016730	oxidoreductase activity, acting on iron-sulfur proteins as donors	2
GO:0005319	lipid transporter activity	2
GO:0008134	transcription factor binding	2
GO:0015197	peptide transporter activity	2
GO:0036459	ubiquitinyl hydrolase activity	2
GO:0019840	isoprenoid binding	2
GO:0030613	oxidoreductase activity, acting on phosphorus or arsenic in donors	2
GO:0005089	Rho guanyl-nucleotide exchange factor activity	1
GO:0060590	ATPase regulator activity	1
GO:0043495	protein anchor	1
GO:0016801	hydrolase activity, acting on ether bonds	1
GO:0042393	histone binding	1
GO:0019948	SUMO activating enzyme activity	1
GO:0010242	oxygen evolving activity	1
GO:0046992	oxidoreductase activity, acting on X-H and Y-H to form an X-Y bond	1
GO:0051192	prosthetic group binding	1
GO:0000996	core DNA-dependent RNA polymerase binding promoter specificity activity	1
GO:0060229	lipase activator activity	1
GO:0046508	hydrolase activity, acting on carbon-sulfur bonds	1
GO:0042978	ornithine decarboxylase activator activity	1
GO:0008061	chitin binding	1
GO:0015562	efflux transmembrane transporter activity	1
GO:0016849	phosphorus-oxygen lyase activity	1
GO:0005344	oxygen transporter activity	1
GO:0000170	sphingosine hydroxylase activity	1
GO:0008428	ribonuclease inhibitor activity	1
GO:0030742	GTP-dependent protein binding	1
GO:0019212	phosphatase inhibitor activity	1
GO:0005539	glycosaminoglycan binding	1
GO:0051219	phosphoprotein binding	1
GO:1901682	sulfur compound transmembrane transporter activity	1
GO:0016725	oxidoreductase activity, acting on CH or CH2 groups	1
GO:0045550	geranylgeranyl reductase activity	1

## Sheet: S8-4 Cell component
GO-id	GO-term	Score
GO:0005622	intracellular	1484
GO:0071944	cell periphery	548
GO:0031224	intrinsic component of membrane	216
GO:0031090	organelle membrane	203
GO:0012505	endomembrane system	197
GO:0043233	organelle lumen	195
GO:0031975	envelope	189
GO:1902494	catalytic complex	114
GO:0009506	plasmodesma	70
GO:0044815	DNA packaging complex	29
GO:1990104	DNA bending complex	29
GO:0031988	membrane-bounded vesicle	27
GO:0070469	respiratory chain	23
GO:0016469	proton-transporting two-sector ATPase complex	22
GO:0019898	extrinsic component of membrane	13
GO:0042995	cell projection	3
GO:0005615	extracellular space	3
GO:0098552	side of membrane	3
GO:0009986	cell surface	2
GO:0032153	cell division site	1
GO:0060187	cell pole	1
GO:0030427	site of polarized growth	1
GO:0009344	nitrite reductase complex [NAD(P)H]	1
GO:0045177	apical part of cell	1
GO:0045121	membrane raft	1
