# Supplementary material for: Identification of Multiple Stress Responsive Genes by Sequencing a Normalized cDNA Library from Sea-Land Cotton (Gossypium barbadense L.)
Source: PLoS One. 2016 Mar 31;11(3):e0152927. doi: 10.1371/journal.pone.0152927 (PMC4816313; doi:10.1371/journal.pone.0152927)
Supplement: S10 Table — The 3135 uniESTs were identified by a blastx search against the Plant Stress Protein database (PSPDB, http://www.bioclues.org/pspdb/) to identify stress-related genes. A total of 919 sequences had homologs (blastx, E-value ≤ 10−5) in the PSPDB. (XLSX) [file pone.0152927.s012.xlsx]

## Sheet: Table S10 UniESTs match PSPDB
UniESTs ID	Protein name	Stress factors	Detail
CO000445	AKR2_ARATH	Antibacterial	sp|Q9SAR5|AKR2_ARATH Ankyrin repeat domain-containing protein 2 OS=Arabidopsis thaliana GN=AKR2 PE=1 SV=2
CO000454	CCR1_ARATH	Antibacterial	sp|Q9S9N9|CCR1_ARATH Cinnamoyl-CoA reductase 1 OS=Arabidopsis thaliana GN=CCR1 PE=1 SV=1
CO000056	FLS2_ARATH	Antibacterial	sp|Q9FL28|FLS2_ARATH LRR receptor-like serine/threonine-protein kinase FLS2 OS=Arabidopsis thaliana GN=FLS2 PE=1 SV=1
CO000304	PSBP1_ARATH	Antibacterial	sp|Q42029|PSBP1_ARATH Oxygen-evolving enhancer protein 2-1, chloroplastic OS=Arabidopsis thaliana GN=PSBP1 PE=1 SV=2
CO000230	PEPR1_ARATH	Antibacterial	sp|Q9SSL9|PEPR1_ARATH Leucine-rich repeat receptor-like protein kinase PEPR1 OS=Arabidopsis thaliana GN=PEPR1 PE=1 SV=1
CO000394	H2A6_ARATH	Antibacterial	sp|Q9LD28|H2A6_ARATH Histone H2A.6 OS=Arabidopsis thaliana GN=RAT5 PE=1 SV=1
CO000300	CRK5_ARATH	Antibacterial	sp|Q9C5S8|CRK5_ARATH Cysteine-rich receptor-like protein kinase 5 OS=Arabidopsis thaliana GN=CRK5 PE=1 SV=1
CO000523	SDR1_ARATH	Antibacterial	sp|Q9M2E2|SDR1_ARATH (+)-neomenthol dehydrogenase OS=Arabidopsis thaliana GN=SDR1 PE=1 SV=1
CO000532	RIN4_ARATH	Antibacterial	sp|Q8GYN5|RIN4_ARATH RPM1-interacting protein 4 OS=Arabidopsis thaliana GN=RIN4 PE=1 SV=1
CO000168	CCR2_ARATH	Antibacterial	sp|Q9SAH9|CCR2_ARATH Cinnamoyl-CoA reductase 2 OS=Arabidopsis thaliana GN=CCR2 PE=1 SV=1
CO000588	DIR1_ARATH	Antibacterial	sp|Q8W453|DIR1_ARATH Putative lipid-transfer protein DIR1 OS=Arabidopsis thaliana GN=DIR1 PE=1 SV=1
CO000244	PR1_MEDSA	Antibacterial	sp|Q43560|PR1_MEDSA Class-10 pathogenesis-related protein 1 OS=Medicago sativa GN=MSPR10-1 PE=2 SV=1
CO000522	DIR1_ARATH	Antibacterial	sp|Q8W453|DIR1_ARATH Putative lipid-transfer protein DIR1 OS=Arabidopsis thaliana GN=DIR1 PE=1 SV=1
CO000158	RBP47_NICPL	Antibacterial	sp|Q9LEB3|RBP47_NICPL Polyadenylate-binding protein RBP47 OS=Nicotiana plumbaginifolia GN=RBP47 PE=1 SV=1
CO000370	H2AV1_ARATH	Antibacterial	sp|O23628|H2AV1_ARATH Histone H2A variant 1 OS=Arabidopsis thaliana GN=H2AV PE=1 SV=1
CO000222	RBP47_NICPL	Antibacterial	sp|Q9LEB3|RBP47_NICPL Polyadenylate-binding protein RBP47 OS=Nicotiana plumbaginifolia GN=RBP47 PE=1 SV=1
SRS0234	H2A6_ARATH	Antibacterial	sp|Q9LD28|H2A6_ARATH Histone H2A.6 OS=Arabidopsis thaliana GN=RAT5 PE=1 SV=1
SRS0255	BGIA_MOMCH	Antibacterial	sp|P24076|BGIA_MOMCH Glu S.griseus protease inhibitor OS=Momordica charantia PE=1 SV=1
SRS0308	COPT1_ORYSJ	Antibacterial	sp|Q94EE4|COPT1_ORYSJ Copper transporter 1 OS=Oryza sativa subsp. japonica GN=COPT1 PE=2 SV=1
SRS0478	DIR1_ARATH	Antibacterial	sp|Q8W453|DIR1_ARATH Putative lipid-transfer protein DIR1 OS=Arabidopsis thaliana GN=DIR1 PE=1 SV=1
SRS0484	WRK33_ARATH	Antibacterial	sp|Q8S8P5|WRK33_ARATH Probable WRKY transcription factor 33 OS=Arabidopsis thaliana GN=WRKY33 PE=1 SV=2
SRS0504	ARGD_ARATH	Antibacterial	sp|Q9M8M7|ARGD_ARATH Acetylornithine aminotransferase, chloroplastic/mitochondrial OS=Arabidopsis thaliana GN=WIN1 PE=1 SV=1
SRS0515	RBOHD_ARATH	Antibacterial	sp|Q9FIJ0|RBOHD_ARATH Respiratory burst oxidase homolog protein D OS=Arabidopsis thaliana GN=RBOHD PE=1 SV=1
SRS0520	RBP47_NICPL	Antibacterial	sp|Q9LEB3|RBP47_NICPL Polyadenylate-binding protein RBP47 OS=Nicotiana plumbaginifolia GN=RBP47 PE=1 SV=1
SRS0565	SOT12_ARATH	Antibacterial	sp|P52839|SOT12_ARATH Cytosolic sulfotransferase 12 OS=Arabidopsis thaliana GN=SOT12 PE=1 SV=2
SRS0573	WRK33_ARATH	Antibacterial	sp|Q8S8P5|WRK33_ARATH Probable WRKY transcription factor 33 OS=Arabidopsis thaliana GN=WRKY33 PE=1 SV=2
SRS0579	H2AV3_ARATH	Antibacterial	sp|Q9C944|H2AV3_ARATH Probable histone H2A variant 3 OS=Arabidopsis thaliana GN=At1g52740 PE=1 SV=1
SRS0618	DIR1_ARATH	Antibacterial	sp|Q8W453|DIR1_ARATH Putative lipid-transfer protein DIR1 OS=Arabidopsis thaliana GN=DIR1 PE=1 SV=1
SRS0652	RAR1_ARATH	Antibacterial	sp|Q9SE33|RAR1_ARATH Cysteine and histidine-rich domain-containing protein RAR1 OS=Arabidopsis thaliana GN=RAR1 PE=1 SV=1
SRS0666	CCR1_ARATH	Antibacterial	sp|Q9S9N9|CCR1_ARATH Cinnamoyl-CoA reductase 1 OS=Arabidopsis thaliana GN=CCR1 PE=1 SV=1
SRS0740	CCR2_ARATH	Antibacterial	sp|Q9SAH9|CCR2_ARATH Cinnamoyl-CoA reductase 2 OS=Arabidopsis thaliana GN=CCR2 PE=1 SV=1
SRS0844	AKR2_ARATH	Antibacterial	sp|Q9SAR5|AKR2_ARATH Ankyrin repeat domain-containing protein 2 OS=Arabidopsis thaliana GN=AKR2 PE=1 SV=2
SRS0859	BIK1_ARATH	Antibacterial	sp|O48814|BIK1_ARATH Serine/threonine-protein kinase BIK1 OS=Arabidopsis thaliana GN=BIK1 PE=1 SV=1
SRS0885	VDAC1_ARATH	Antibacterial	sp|Q9SRH5|VDAC1_ARATH Mitochondrial outer membrane protein porin 1 OS=Arabidopsis thaliana GN=VDAC1 PE=1 SV=3
SRS0898	H2A6_ARATH	Antibacterial	sp|Q9LD28|H2A6_ARATH Histone H2A.6 OS=Arabidopsis thaliana GN=RAT5 PE=1 SV=1
SRS0899	DAPAT_ARATH	Antibacterial	sp|Q93ZN9|DAPAT_ARATH LL-diaminopimelate aminotransferase, chloroplastic OS=Arabidopsis thaliana GN=DAP PE=1 SV=1
SRS0981	FLS2_ARATH	Antibacterial	sp|Q9FL28|FLS2_ARATH LRR receptor-like serine/threonine-protein kinase FLS2 OS=Arabidopsis thaliana GN=FLS2 PE=1 SV=1
SRS0988	FLS2_ARATH	Antibacterial	sp|Q9FL28|FLS2_ARATH LRR receptor-like serine/threonine-protein kinase FLS2 OS=Arabidopsis thaliana GN=FLS2 PE=1 SV=1
SRS1080	H2A6_ARATH	Antibacterial	sp|Q9LD28|H2A6_ARATH Histone H2A.6 OS=Arabidopsis thaliana GN=RAT5 PE=1 SV=1
SRS1172	EF100_ARATH	Antibacterial	sp|O80337|EF100_ARATH Ethylene-responsive transcription factor 1A OS=Arabidopsis thaliana GN=ERF1A PE=1 SV=2
SRS1180	P2C59_ARATH	Antibacterial	sp|Q8RXV3|P2C59_ARATH Probable protein phosphatase 2C 59 OS=Arabidopsis thaliana GN=WIN2 PE=1 SV=1
SRS1215	H2AV1_ARATH	Antibacterial	sp|O23628|H2AV1_ARATH Histone H2A variant 1 OS=Arabidopsis thaliana GN=H2AV PE=1 SV=1
SRS1414	CRK5_ARATH	Antibacterial	sp|Q9C5S8|CRK5_ARATH Cysteine-rich receptor-like protein kinase 5 OS=Arabidopsis thaliana GN=CRK5 PE=1 SV=1
SRS1509	FLS2_ARATH	Antibacterial	sp|Q9FL28|FLS2_ARATH LRR receptor-like serine/threonine-protein kinase FLS2 OS=Arabidopsis thaliana GN=FLS2 PE=1 SV=1
SRS1528	CCR2_ARATH	Antibacterial	sp|Q9SAH9|CCR2_ARATH Cinnamoyl-CoA reductase 2 OS=Arabidopsis thaliana GN=CCR2 PE=1 SV=1
SRS1536	AIG2_ARATH	Antibacterial	sp|P54121|AIG2_ARATH Protein AIG2 OS=Arabidopsis thaliana GN=AIG2 PE=2 SV=1
SRS1583	PSBP1_ARATH	Antibacterial	sp|Q42029|PSBP1_ARATH Oxygen-evolving enhancer protein 2-1, chloroplastic OS=Arabidopsis thaliana GN=PSBP1 PE=1 SV=2
SRS1597	BH047_ARATH	Antibacterial	sp|Q9SN74|BH047_ARATH Transcription factor bHLH47 OS=Arabidopsis thaliana GN=BHLH47 PE=2 SV=1
SRS1637	PSBP1_ARATH	Antibacterial	sp|Q42029|PSBP1_ARATH Oxygen-evolving enhancer protein 2-1, chloroplastic OS=Arabidopsis thaliana GN=PSBP1 PE=1 SV=2
SRS1651	AKR2_ARATH	Antibacterial	sp|Q9SAR5|AKR2_ARATH Ankyrin repeat domain-containing protein 2 OS=Arabidopsis thaliana GN=AKR2 PE=1 SV=2
SRS1737	GSTF6_ARATH	Antibacterial	sp|P42760|GSTF6_ARATH Glutathione S-transferase F6 OS=Arabidopsis thaliana GN=GSTF6 PE=1 SV=2
SRS1794	ARGD_ARATH	Antibacterial	sp|Q9M8M7|ARGD_ARATH Acetylornithine aminotransferase, chloroplastic/mitochondrial OS=Arabidopsis thaliana GN=WIN1 PE=1 SV=1
SRS1930	WRK33_ARATH	Antibacterial	sp|Q8S8P5|WRK33_ARATH Probable WRKY transcription factor 33 OS=Arabidopsis thaliana GN=WRKY33 PE=1 SV=2
SRS1983	CPR5_ARATH	Antibacterial	sp|Q9LV85|CPR5_ARATH Protein CPR-5 OS=Arabidopsis thaliana GN=CPR5 PE=1 SV=1
SRS1990	H2A6_ARATH	Antibacterial	sp|Q9LD28|H2A6_ARATH Histone H2A.6 OS=Arabidopsis thaliana GN=RAT5 PE=1 SV=1
SRS2006	PBS1_ARATH	Antibacterial	sp|Q9FE20|PBS1_ARATH Serine/threonine-protein kinase PBS1 OS=Arabidopsis thaliana GN=PBS1 PE=1 SV=1
SRS2011	E13H_TOBAC	Antibacterial	sp|P36401|E13H_TOBAC Glucan endo-1,3-beta-glucosidase, acidic isoform PR-Q' OS=Nicotiana tabacum PE=1 SV=1
SRS2036	CPR30_ARATH	Antibacterial	sp|Q9SU30|CPR30_ARATH F-box protein CPR30 OS=Arabidopsis thaliana GN=CPR30 PE=1 SV=2
SRS2041	XB3_ORYSJ	Antibacterial	sp|Q65XV2|XB3_ORYSJ E3 ubiquitin-protein ligase XB3 OS=Oryza sativa subsp. japonica GN=XB3 PE=1 SV=1
SRS2052	H2A6_ARATH	Antibacterial	sp|Q9LD28|H2A6_ARATH Histone H2A.6 OS=Arabidopsis thaliana GN=RAT5 PE=1 SV=1
SRS2078	CRK20_ARATH	Antibacterial	sp|O65479|CRK20_ARATH Putative cysteine-rich receptor-like protein kinase 20 OS=Arabidopsis thaliana GN=CRK20 PE=2 SV=2
SRS2085	RBP47_NICPL	Antibacterial	sp|Q9LEB3|RBP47_NICPL Polyadenylate-binding protein RBP47 OS=Nicotiana plumbaginifolia GN=RBP47 PE=1 SV=1
SRS2104	RBP47_NICPL	Antibacterial	sp|Q9LEB3|RBP47_NICPL Polyadenylate-binding protein RBP47 OS=Nicotiana plumbaginifolia GN=RBP47 PE=1 SV=1
SRS2133	PTR3_ARATH	Antibacterial	sp|Q9FNL7|PTR3_ARATH Peptide transporter PTR3-A OS=Arabidopsis thaliana GN=PTR3-A PE=2 SV=1
SRS2153	CRK19_ARATH	Antibacterial	sp|Q8GWJ7|CRK19_ARATH Cysteine-rich receptor-like protein kinase 19 OS=Arabidopsis thaliana GN=CRK19 PE=2 SV=2
SRS2159	CRK20_ARATH	Antibacterial	sp|O65479|CRK20_ARATH Putative cysteine-rich receptor-like protein kinase 20 OS=Arabidopsis thaliana GN=CRK20 PE=2 SV=2
SRS2197	AIG1_ARATH	Antibacterial	sp|P54120|AIG1_ARATH Protein AIG1 OS=Arabidopsis thaliana GN=AIG1 PE=2 SV=1
SRS2219	CRK5_ARATH	Antibacterial	sp|Q9C5S8|CRK5_ARATH Cysteine-rich receptor-like protein kinase 5 OS=Arabidopsis thaliana GN=CRK5 PE=1 SV=1
SRS2233	VDAC1_ARATH	Antibacterial	sp|Q9SRH5|VDAC1_ARATH Mitochondrial outer membrane protein porin 1 OS=Arabidopsis thaliana GN=VDAC1 PE=1 SV=3
SRS2245	PTR3_ARATH	Antibacterial	sp|Q9FNL7|PTR3_ARATH Peptide transporter PTR3-A OS=Arabidopsis thaliana GN=PTR3-A PE=2 SV=1
SRS2249	WRK33_ARATH	Antibacterial	sp|Q8S8P5|WRK33_ARATH Probable WRKY transcription factor 33 OS=Arabidopsis thaliana GN=WRKY33 PE=1 SV=2
SRS2252	MES1_ARATH	Antibacterial	sp|Q8S8S9|MES1_ARATH Methylesterase 1 OS=Arabidopsis thaliana GN=MES1 PE=1 SV=1
SRS2281	SDR1_ARATH	Antibacterial	sp|Q9M2E2|SDR1_ARATH (+)-neomenthol dehydrogenase OS=Arabidopsis thaliana GN=SDR1 PE=1 SV=1
SRS2282	PTP1_ARATH	Antibacterial	sp|O82656|PTP1_ARATH Protein-tyrosine-phosphatase PTP1 OS=Arabidopsis thaliana GN=PTP1 PE=1 SV=1
SRS2296	PBS1_ARATH	Antibacterial	sp|Q9FE20|PBS1_ARATH Serine/threonine-protein kinase PBS1 OS=Arabidopsis thaliana GN=PBS1 PE=1 SV=1
SRS2327	RBP47_NICPL	Antibacterial	sp|Q9LEB3|RBP47_NICPL Polyadenylate-binding protein RBP47 OS=Nicotiana plumbaginifolia GN=RBP47 PE=1 SV=1
SRS2328	CRR2_ARATH	Antibacterial	sp|Q8GUJ2|CRR2_ARATH Cysteine-rich repeat secretory protein 2 OS=Arabidopsis thaliana GN=CRRSP2 PE=2 SV=1
SRS2359	WRKY6_ARATH	Antibacterial	sp|Q9C519|WRKY6_ARATH WRKY transcription factor 6 OS=Arabidopsis thaliana GN=WRKY6 PE=1 SV=1
SRS2370	RIN4_ARATH	Antibacterial	sp|Q8GYN5|RIN4_ARATH RPM1-interacting protein 4 OS=Arabidopsis thaliana GN=RIN4 PE=1 SV=1
SRS2380	AKR2_ARATH	Antibacterial	sp|Q9SAR5|AKR2_ARATH Ankyrin repeat domain-containing protein 2 OS=Arabidopsis thaliana GN=AKR2 PE=1 SV=2
SRS2484	RBOHD_ARATH	Antibacterial	sp|Q9FIJ0|RBOHD_ARATH Respiratory burst oxidase homolog protein D OS=Arabidopsis thaliana GN=RBOHD PE=1 SV=1
CO000167	PME41_ARATH	Antifungal	sp|Q8RXK7|PME41_ARATH Probable pectinesterase/pectinesterase inhibitor 41 OS=Arabidopsis thaliana GN=PME41 PE=2 SV=2
CO000201	E13B_HORVU	Antifungal	sp|P15737|E13B_HORVU Glucan endo-1,3-beta-glucosidase GII OS=Hordeum vulgare PE=1 SV=1
CO000320	C71AD_ARATH	Antifungal	sp|O49342|C71AD_ARATH Indoleacetaldoxime dehydratase OS=Arabidopsis thaliana GN=CYP71A13 PE=1 SV=1
CO000592	4CLLA_ARATH	Antifungal	sp|Q9SMT7|4CLLA_ARATH 4-coumarate--CoA ligase-like 10 OS=Arabidopsis thaliana GN=4CLL10 PE=2 SV=1
CO000266	PME18_ARATH	Antifungal	sp|Q1JPL7|PME18_ARATH Pectinesterase/pectinesterase inhibitor 18 OS=Arabidopsis thaliana GN=PME18 PE=1 SV=3
CO000553	ATL55_ARATH	Antifungal	sp|Q9LX93|ATL55_ARATH E3 ubiquitin-protein ligase RING1 OS=Arabidopsis thaliana GN=ATL55 PE=1 SV=1
CO000141	LAC4_ORYSJ	Antifungal	sp|Q5N9X2|LAC4_ORYSJ Laccase-4 OS=Oryza sativa subsp. japonica GN=LAC4 PE=2 SV=1
CO000289	STAD7_ARATH	Antifungal	sp|O22832|STAD7_ARATH Acyl-[acyl-carrier-protein] desaturase 7, chloroplastic OS=Arabidopsis thaliana GN=FAB2 PE=1 SV=1
CO000109	GSTUG_ARATH	Antifungal	sp|Q9XIF8|GSTUG_ARATH Glutathione S-transferase U16 OS=Arabidopsis thaliana GN=GSTU16 PE=2 SV=1
CO000114	PRS1_SOLTU	Antifungal	sp|P17641|PRS1_SOLTU Pathogenesis-related protein STH-21 OS=Solanum tuberosum GN=STH-21 PE=2 SV=1
CO000336	NLTP_BETVU	Antifungal	sp|Q43748|NLTP_BETVU Non-specific lipid-transfer protein OS=Beta vulgaris GN=IWF1' PE=3 SV=1
CO000343	NLTP_BETVU	Antifungal	sp|Q43748|NLTP_BETVU Non-specific lipid-transfer protein OS=Beta vulgaris GN=IWF1' PE=3 SV=1
CO000162	CASS_RICCO	Antifungal	sp|P59287|CASS_RICCO Casbene synthase, chloroplastic OS=Ricinus communis GN=RCOM_1574350 PE=1 SV=1
CO000242	AKRC9_ARATH	Antifungal	sp|Q0PGJ6|AKRC9_ARATH Aldo-keto reductase family 4 member C9 OS=Arabidopsis thaliana GN=AKR4C9 PE=1 SV=1
CO000349	ERF1_ORYSJ	Antifungal	sp|Q6K7E6|ERF1_ORYSJ Ethylene-responsive transcription factor 1 OS=Oryza sativa subsp. japonica GN=EREBP1 PE=1 SV=1
CO000372	PR11_PETCR	Antifungal	sp|P19417|PR11_PETCR Pathogenesis-related protein A OS=Petroselinum crispum GN=PCPR1-1 PE=2 SV=1
SRS0076	CASS_RICCO	Antifungal	sp|P59287|CASS_RICCO Casbene synthase, chloroplastic OS=Ricinus communis GN=RCOM_1574350 PE=1 SV=1
SRS0221	ATL55_ARATH	Antifungal	sp|Q9LX93|ATL55_ARATH E3 ubiquitin-protein ligase RING1 OS=Arabidopsis thaliana GN=ATL55 PE=1 SV=1
SRS0393	SNAK2_SOLTU	Antifungal	sp|Q93X17|SNAK2_SOLTU Snakin-2 OS=Solanum tuberosum GN=SN2 PE=1 SV=1
SRS0459	CASS_RICCO	Antifungal	sp|P59287|CASS_RICCO Casbene synthase, chloroplastic OS=Ricinus communis GN=RCOM_1574350 PE=1 SV=1
SRS0492	PR19A_ARATH	Antifungal	sp|Q94BR4|PR19A_ARATH Pre-mRNA-processing factor 19 homolog 1 OS=Arabidopsis thaliana GN=PRP19A PE=1 SV=1
SRS0633	MED21_ARATH	Antifungal	sp|C0LU16|MED21_ARATH Mediator of RNA polymerase II transcription subunit 21 OS=Arabidopsis thaliana GN=MED21 PE=1 SV=1
SRS0642	BAK1_ARATH	Antifungal	sp|Q94F62|BAK1_ARATH BRASSINOSTEROID INSENSITIVE 1-associated receptor kinase 1 OS=Arabidopsis thaliana GN=BAK1 PE=1 SV=2
SRS0654	LSD1_ORYSJ	Antifungal	sp|Q0J7V9|LSD1_ORYSJ Protein LSD1 OS=Oryza sativa subsp. japonica GN=LSD1 PE=2 SV=1
SRS0768	SNAK1_SOLTU	Antifungal	sp|Q948Z4|SNAK1_SOLTU Snakin-1 OS=Solanum tuberosum GN=SN1 PE=1 SV=1
SRS0799	CHI4_ORYSJ	Antifungal	sp|O04138|CHI4_ORYSJ Chitinase 4 OS=Oryza sativa subsp. japonica GN=Cht4 PE=2 SV=2
SRS0835	NDR1_ARATH	Antifungal	sp|O48915|NDR1_ARATH Protein NDR1 OS=Arabidopsis thaliana GN=NDR1 PE=1 SV=1
SRS0964	RPS5_ARATH	Antifungal	sp|O64973|RPS5_ARATH Disease resistance protein RPS5 OS=Arabidopsis thaliana GN=RPS5 PE=1 SV=2
SRS1031	C71AD_ARATH	Antifungal	sp|O49342|C71AD_ARATH Indoleacetaldoxime dehydratase OS=Arabidopsis thaliana GN=CYP71A13 PE=1 SV=1
SRS1046	SL11_ORYSJ	Antifungal	sp|Q0IMG9|SL11_ORYSJ E3 ubiquitin-protein ligase SPL11 OS=Oryza sativa subsp. japonica GN=SPL11 PE=1 SV=2
SRS1089	WRK53_ARATH	Antifungal	sp|Q9SUP6|WRK53_ARATH Probable WRKY transcription factor 53 OS=Arabidopsis thaliana GN=WRKY53 PE=1 SV=1
SRS1091	GLIP1_ARATH	Antifungal	sp|Q9FLN0|GLIP1_ARATH GDSL esterase/lipase 1 OS=Arabidopsis thaliana GN=GLIP1 PE=1 SV=1
SRS1122	OS35_SOLCO	Antifungal	sp|P50703|OS35_SOLCO Osmotin-like protein OSML15 OS=Solanum commersonii PE=2 SV=1
SRS1123	PR2_PETCR	Antifungal	sp|P27538|PR2_PETCR Pathogenesis-related protein 2 OS=Petroselinum crispum GN=PR2 PE=2 SV=1
SRS1173	STAD7_ARATH	Antifungal	sp|O22832|STAD7_ARATH Acyl-[acyl-carrier-protein] desaturase 7, chloroplastic OS=Arabidopsis thaliana GN=FAB2 PE=1 SV=1
SRS1253	BAK1_ARATH	Antifungal	sp|Q94F62|BAK1_ARATH BRASSINOSTEROID INSENSITIVE 1-associated receptor kinase 1 OS=Arabidopsis thaliana GN=BAK1 PE=1 SV=2
SRS1259	PR19B_ARATH	Antifungal	sp|O22785|PR19B_ARATH Pre-mRNA-processing factor 19 homolog 2 OS=Arabidopsis thaliana GN=PRP19B PE=1 SV=3
SRS1283	AKRC9_ARATH	Antifungal	sp|Q0PGJ6|AKRC9_ARATH Aldo-keto reductase family 4 member C9 OS=Arabidopsis thaliana GN=AKR4C9 PE=1 SV=1
SRS1327	AKRC8_ARATH	Antifungal	sp|O80944|AKRC8_ARATH Aldo-keto reductase family 4 member C8 OS=Arabidopsis thaliana GN=AKR4C8 PE=1 SV=2
SRS1396	CASS_RICCO	Antifungal	sp|P59287|CASS_RICCO Casbene synthase, chloroplastic OS=Ricinus communis GN=RCOM_1574350 PE=1 SV=1
SRS1424	CATA1_GOSHI	Antifungal	sp|P17598|CATA1_GOSHI Catalase isozyme 1 OS=Gossypium hirsutum GN=CAT1 PE=2 SV=2
SRS1433	Y5659_ARATH	Antifungal	sp|Q9FMD7|Y5659_ARATH Probable inactive receptor kinase At5g16590 OS=Arabidopsis thaliana GN=At5g16590 PE=1 SV=1
SRS1496	PR19A_ARATH	Antifungal	sp|Q94BR4|PR19A_ARATH Pre-mRNA-processing factor 19 homolog 1 OS=Arabidopsis thaliana GN=PRP19A PE=1 SV=1
SRS1553	LAC4_ORYSJ	Antifungal	sp|Q5N9X2|LAC4_ORYSJ Laccase-4 OS=Oryza sativa subsp. japonica GN=LAC4 PE=2 SV=1
SRS1564	MPK6_ARATH	Antifungal	sp|Q39026|MPK6_ARATH Mitogen-activated protein kinase 6 OS=Arabidopsis thaliana GN=MPK6 PE=1 SV=1
SRS1578	GBLPA_ORYSJ	Antifungal	sp|P49027|GBLPA_ORYSJ Guanine nucleotide-binding protein subunit beta-like protein A OS=Oryza sativa subsp. japonica GN=RACK1A PE=1 SV=1
SRS1579	MPK6_ARATH	Antifungal	sp|Q39026|MPK6_ARATH Mitogen-activated protein kinase 6 OS=Arabidopsis thaliana GN=MPK6 PE=1 SV=1
SRS1587	PSB1_ARATH	Antifungal	sp|P42742|PSB1_ARATH Proteasome subunit beta type-1 OS=Arabidopsis thaliana GN=PBF1 PE=1 SV=2
SRS1715	NDR1_ARATH	Antifungal	sp|O48915|NDR1_ARATH Protein NDR1 OS=Arabidopsis thaliana GN=NDR1 PE=1 SV=1
SRS1741	EA6_ARATH	Antifungal	sp|Q06915|EA6_ARATH Probable glucan endo-1,3-beta-glucosidase A6 OS=Arabidopsis thaliana GN=A6 PE=2 SV=1
SRS1774	GBLPA_ORYSJ	Antifungal	sp|P49027|GBLPA_ORYSJ Guanine nucleotide-binding protein subunit beta-like protein A OS=Oryza sativa subsp. japonica GN=RACK1A PE=1 SV=1
SRS1837	PR19B_ARATH	Antifungal	sp|O22785|PR19B_ARATH Pre-mRNA-processing factor 19 homolog 2 OS=Arabidopsis thaliana GN=PRP19B PE=1 SV=3
SRS1849	SL11_ORYSJ	Antifungal	sp|Q0IMG9|SL11_ORYSJ E3 ubiquitin-protein ligase SPL11 OS=Oryza sativa subsp. japonica GN=SPL11 PE=1 SV=2
SRS1905	WAKLI_ARATH	Antifungal	sp|Q8RY17|WAKLI_ARATH Wall-associated receptor kinase-like 22 OS=Arabidopsis thaliana GN=WAKL22 PE=2 SV=1
SRS1909	LAC4_ORYSJ	Antifungal	sp|Q5N9X2|LAC4_ORYSJ Laccase-4 OS=Oryza sativa subsp. japonica GN=LAC4 PE=2 SV=1
SRS1924	ATL2_ARATH	Antifungal	sp|Q8L9T5|ATL2_ARATH RING-H2 finger protein ATL2 OS=Arabidopsis thaliana GN=ATL2 PE=2 SV=2
SRS1965	GUN25_ARATH	Antifungal	sp|Q38890|GUN25_ARATH Endoglucanase 25 OS=Arabidopsis thaliana GN=KOR PE=1 SV=1
SRS1974	RFL1_ARATH	Antifungal	sp|Q8L3R3|RFL1_ARATH Disease resistance protein RFL1 OS=Arabidopsis thaliana GN=RFL1 PE=3 SV=2
SRS1982	CASS_RICCO	Antifungal	sp|P59287|CASS_RICCO Casbene synthase, chloroplastic OS=Ricinus communis GN=RCOM_1574350 PE=1 SV=1
SRS1986	E13B_HEVBR	Antifungal	sp|P52407|E13B_HEVBR Glucan endo-1,3-beta-glucosidase, basic vacuolar isoform OS=Hevea brasiliensis GN=HGN1 PE=1 SV=2
SRS2001	E13B_PRUPE	Antifungal	sp|P52408|E13B_PRUPE Glucan endo-1,3-beta-glucosidase, basic isoform OS=Prunus persica GN=GNS1 PE=3 SV=1
SRS2017	GBLPA_ORYSJ	Antifungal	sp|P49027|GBLPA_ORYSJ Guanine nucleotide-binding protein subunit beta-like protein A OS=Oryza sativa subsp. japonica GN=RACK1A PE=1 SV=1
SRS2072	PR2_PETCR	Antifungal	sp|P27538|PR2_PETCR Pathogenesis-related protein 2 OS=Petroselinum crispum GN=PR2 PE=2 SV=1
SRS2131	4CLLA_ARATH	Antifungal	sp|Q9SMT7|4CLLA_ARATH 4-coumarate--CoA ligase-like 10 OS=Arabidopsis thaliana GN=4CLL10 PE=2 SV=1
SRS2181	PLY13_ARATH	Antifungal	sp|Q93Z04|PLY13_ARATH Probable pectate lyase 13 OS=Arabidopsis thaliana GN=PMR6 PE=1 SV=1
SRS2190	AKRC8_ARATH	Antifungal	sp|O80944|AKRC8_ARATH Aldo-keto reductase family 4 member C8 OS=Arabidopsis thaliana GN=AKR4C8 PE=1 SV=2
SRS2196	4CLLA_ARATH	Antifungal	sp|Q9SMT7|4CLLA_ARATH 4-coumarate--CoA ligase-like 10 OS=Arabidopsis thaliana GN=4CLL10 PE=2 SV=1
SRS2204	PME18_ARATH	Antifungal	sp|Q1JPL7|PME18_ARATH Pectinesterase/pectinesterase inhibitor 18 OS=Arabidopsis thaliana GN=PME18 PE=1 SV=3
SRS2212	ATL2_ARATH	Antifungal	sp|Q8L9T5|ATL2_ARATH RING-H2 finger protein ATL2 OS=Arabidopsis thaliana GN=ATL2 PE=2 SV=2
SRS2235	MPK12_ORYSJ	Antifungal	sp|Q5Z9J0|MPK12_ORYSJ Mitogen-activated protein kinase 12 OS=Oryza sativa subsp. japonica GN=MPK12 PE=1 SV=2
SRS2243	AKRC9_ARATH	Antifungal	sp|Q0PGJ6|AKRC9_ARATH Aldo-keto reductase family 4 member C9 OS=Arabidopsis thaliana GN=AKR4C9 PE=1 SV=1
SRS2261	SL11_ORYSJ	Antifungal	sp|Q0IMG9|SL11_ORYSJ E3 ubiquitin-protein ligase SPL11 OS=Oryza sativa subsp. japonica GN=SPL11 PE=1 SV=2
SRS2267	LAC4_ORYSJ	Antifungal	sp|Q5N9X2|LAC4_ORYSJ Laccase-4 OS=Oryza sativa subsp. japonica GN=LAC4 PE=2 SV=1
SRS2277	PME18_ARATH	Antifungal	sp|Q1JPL7|PME18_ARATH Pectinesterase/pectinesterase inhibitor 18 OS=Arabidopsis thaliana GN=PME18 PE=1 SV=3
SRS2300	BAK1_ARATH	Antifungal	sp|Q94F62|BAK1_ARATH BRASSINOSTEROID INSENSITIVE 1-associated receptor kinase 1 OS=Arabidopsis thaliana GN=BAK1 PE=1 SV=2
SRS2342	LAC4_ORYSJ	Antifungal	sp|Q5N9X2|LAC4_ORYSJ Laccase-4 OS=Oryza sativa subsp. japonica GN=LAC4 PE=2 SV=1
SRS2373	WAKLI_ARATH	Antifungal	sp|Q8RY17|WAKLI_ARATH Wall-associated receptor kinase-like 22 OS=Arabidopsis thaliana GN=WAKL22 PE=2 SV=1
SRS2394	BAK1_ARATH	Antifungal	sp|Q94F62|BAK1_ARATH BRASSINOSTEROID INSENSITIVE 1-associated receptor kinase 1 OS=Arabidopsis thaliana GN=BAK1 PE=1 SV=2
SRS2426	PME18_ARATH	Antifungal	sp|Q1JPL7|PME18_ARATH Pectinesterase/pectinesterase inhibitor 18 OS=Arabidopsis thaliana GN=PME18 PE=1 SV=3
SRS2485	BAK1_ARATH	Antifungal	sp|Q94F62|BAK1_ARATH BRASSINOSTEROID INSENSITIVE 1-associated receptor kinase 1 OS=Arabidopsis thaliana GN=BAK1 PE=1 SV=2
SRS2486	RBK1_ARATH	Antifungal	sp|Q8H1D6|RBK1_ARATH Receptor-like cytosolic serine/threonine-protein kinase RBK1 OS=Arabidopsis thaliana GN=RBK1 PE=1 SV=1
SRS2491	CASS_RICCO	Antifungal	sp|P59287|CASS_RICCO Casbene synthase, chloroplastic OS=Ricinus communis GN=RCOM_1574350 PE=1 SV=1
CO000369	RL101_ARATH	Antiviral	sp|Q93VT9|RL101_ARATH 60S ribosomal protein L10-1 OS=Arabidopsis thaliana GN=RPL10A PE=1 SV=1
CO000272	RL101_ARATH	Antiviral	sp|Q93VT9|RL101_ARATH 60S ribosomal protein L10-1 OS=Arabidopsis thaliana GN=RPL10A PE=1 SV=1
CO000510	RL101_ARATH	Antiviral	sp|Q93VT9|RL101_ARATH 60S ribosomal protein L10-1 OS=Arabidopsis thaliana GN=RPL10A PE=1 SV=1
SRS0456	PR1C_TOBAC	Antiviral	sp|P09042|PR1C_TOBAC Pathogenesis-related protein 1C OS=Nicotiana tabacum PE=2 SV=3
SRS0632	AGO7_ARATH	Antiviral	sp|Q9C793|AGO7_ARATH Protein argonaute 7 OS=Arabidopsis thaliana GN=AGO7 PE=2 SV=1
SRS0764	GRP1_TOBAC	Antiviral	sp|P23137|GRP1_TOBAC Glycine-rich protein OS=Nicotiana tabacum GN=GRP PE=2 SV=1
SRS1873	TPM1_SOLLC	Antiviral	sp|Q01591|TPM1_SOLLC Osmotin-like protein TPM-1 (Fragment) OS=Solanum lycopersicum GN=TPM-1 PE=2 SV=1
SRS2094	NIK3_ARATH	Antiviral	sp|Q93ZS4|NIK3_ARATH Protein NSP-INTERACTING KINASE 3 OS=Arabidopsis thaliana GN=NIK3 PE=1 SV=1
SRS2161	SDE3_ARATH	Antiviral	sp|Q8GYD9|SDE3_ARATH Probable RNA helicase SDE3 OS=Arabidopsis thaliana GN=SDE3 PE=1 SV=1
SRS2218	IF4E4_ARATH	Antiviral	sp|O04663|IF4E4_ARATH Eukaryotic translation initiation factor isoform 4E OS=Arabidopsis thaliana GN=EIF(ISO)4E PE=1 SV=2
CO000450	LEA5_CITSI	Drought	sp|Q39644|LEA5_CITSI Late embryogenesis abundant protein Lea5 OS=Citrus sinensis GN=LEA5 PE=2 SV=1
CO000466	ALF_ORYSJ	Drought	sp|P17784|ALF_ORYSJ Fructose-bisphosphate aldolase cytoplasmic isozyme OS=Oryza sativa subsp. japonica GN=FBA PE=1 SV=2
CO000409	ABA2_ARATH	Drought	sp|Q9C826|ABA2_ARATH Xanthoxin dehydrogenase OS=Arabidopsis thaliana GN=ABA2 PE=1 SV=1
CO000460	ASPG1_ARATH	Drought	sp|Q9LS40|ASPG1_ARATH Protein ASPARTIC PROTEASE IN GUARD CELL 1 OS=Arabidopsis thaliana GN=ASPG1 PE=1 SV=1
CO000387	DI191_ARATH	Drought	sp|Q39083|DI191_ARATH Protein DEHYDRATION-INDUCED 19 OS=Arabidopsis thaliana GN=DI19-1 PE=1 SV=2
CO000487	ASPG1_ARATH	Drought	sp|Q9LS40|ASPG1_ARATH Protein ASPARTIC PROTEASE IN GUARD CELL 1 OS=Arabidopsis thaliana GN=ASPG1 PE=1 SV=1
CO000084	PIP2_PEA	Drought	sp|P25794|PIP2_PEA Probable aquaporin PIP-type 7a OS=Pisum sativum GN=TRG-31 PE=2 SV=2
CO000202	METK1_ARATH	Drought	sp|P23686|METK1_ARATH S-adenosylmethionine synthase 1 OS=Arabidopsis thaliana GN=SAM1 PE=1 SV=2
CO000042	APX1_PEA	Drought	sp|P48534|APX1_PEA L-ascorbate peroxidase, cytosolic OS=Pisum sativum GN=APX1 PE=1 SV=2
CO000425	DRE1B_ARATH	Drought	sp|P93835|DRE1B_ARATH Dehydration-responsive element-binding protein 1B OS=Arabidopsis thaliana GN=DREB1B PE=2 SV=2
CO000411	H1_SOLPN	Drought	sp|P40267|H1_SOLPN Histone H1 OS=Solanum pennellii PE=2 SV=1
CO000397	ALDR_HORVU	Drought	sp|P23901|ALDR_HORVU Aldose reductase OS=Hordeum vulgare PE=1 SV=1
CO000517	CYSP_PEA	Drought	sp|P25804|CYSP_PEA Cysteine proteinase 15A OS=Pisum sativum PE=1 SV=1
CO000631	AHP1_ARATH	Drought	sp|Q9ZNV9|AHP1_ARATH Histidine-containing phosphotransfer protein 1 OS=Arabidopsis thaliana GN=AHP1 PE=1 SV=1
CO000072	TIP23_MAIZE	Drought	sp|Q84RL6|TIP23_MAIZE Aquaporin TIP2-3 OS=Zea mays GN=TIP2-3 PE=2 SV=2
CO000459	CYSP_PEA	Drought	sp|P25804|CYSP_PEA Cysteine proteinase 15A OS=Pisum sativum PE=1 SV=1
CO000622	SDIR1_ARATH	Drought	sp|Q9M2S6|SDIR1_ARATH E3 ubiquitin-protein ligase SDIR1 OS=Arabidopsis thaliana GN=SDIR1 PE=1 SV=1
CO000576	ABA2_ARATH	Drought	sp|Q9C826|ABA2_ARATH Xanthoxin dehydrogenase OS=Arabidopsis thaliana GN=ABA2 PE=1 SV=1
CO000534	OCT4_ARATH	Drought	sp|Q9LHQ6|OCT4_ARATH Organic cation/carnitine transporter 4 OS=Arabidopsis thaliana GN=OCT4 PE=2 SV=1
CO000490	C3H20_ARATH	Drought	sp|O82199|C3H20_ARATH Zinc finger CCCH domain-containing protein 20 OS=Arabidopsis thaliana GN=At2g19810 PE=2 SV=1
CO000540	CML38_ARATH	Drought	sp|Q9SRE6|CML38_ARATH Calcium-binding protein CML38 OS=Arabidopsis thaliana GN=CML38 PE=2 SV=1
CO000264	CYSP_PEA	Drought	sp|P25804|CYSP_PEA Cysteine proteinase 15A OS=Pisum sativum PE=1 SV=1
CO000332	LEA5_CITSI	Drought	sp|Q39644|LEA5_CITSI Late embryogenesis abundant protein Lea5 OS=Citrus sinensis GN=LEA5 PE=2 SV=1
CO000357	CTL1_ARATH	Drought	sp|Q9MA41|CTL1_ARATH Chitinase-like protein 1 OS=Arabidopsis thaliana GN=CTL1 PE=1 SV=1
CO000031	ABA2_ARATH	Drought	sp|Q9C826|ABA2_ARATH Xanthoxin dehydrogenase OS=Arabidopsis thaliana GN=ABA2 PE=1 SV=1
CO000405	ACCO_DIOKA	Drought	sp|Q8S932|ACCO_DIOKA 1-aminocyclopropane-1-carboxylate oxidase OS=Diospyros kaki GN=DK-ACO1 PE=2 SV=1
CO000617	CML38_ARATH	Drought	sp|Q9SRE6|CML38_ARATH Calcium-binding protein CML38 OS=Arabidopsis thaliana GN=CML38 PE=2 SV=1
CO000515	C3H20_ARATH	Drought	sp|O82199|C3H20_ARATH Zinc finger CCCH domain-containing protein 20 OS=Arabidopsis thaliana GN=At2g19810 PE=2 SV=1
CO000403	LEA14_SOYBN	Drought	sp|P46519|LEA14_SOYBN Desiccation protectant protein Lea14 homolog OS=Glycine max PE=2 SV=1
CO000319	H1_SOLPN	Drought	sp|P40267|H1_SOLPN Histone H1 OS=Solanum pennellii PE=2 SV=1
CO000069	MY1R1_SOLTU	Drought	sp|Q2V9B0|MY1R1_SOLTU Transcription factor MYB1R1 OS=Solanum tuberosum PE=2 SV=1
CO000014	LEA5D_GOSHI	Drought	sp|P46522|LEA5D_GOSHI Late embryogenesis abundant protein Lea5-D OS=Gossypium hirsutum GN=LEA5-D PE=2 SV=1
CO000016	GSTFA_ARATH	Drought	sp|P42761|GSTFA_ARATH Glutathione S-transferase F10 OS=Arabidopsis thaliana GN=GSTF10 PE=1 SV=3
CO000215	APX1_PEA	Drought	sp|P48534|APX1_PEA L-ascorbate peroxidase, cytosolic OS=Pisum sativum GN=APX1 PE=1 SV=2
CO000479	ACCO_DIOKA	Drought	sp|Q8S932|ACCO_DIOKA 1-aminocyclopropane-1-carboxylate oxidase OS=Diospyros kaki GN=DK-ACO1 PE=2 SV=1
CO000123	H1_SOLPN	Drought	sp|P40267|H1_SOLPN Histone H1 OS=Solanum pennellii PE=2 SV=1
CO000521	PTR7_ARATH	Drought	sp|Q05085|PTR7_ARATH Nitrate transporter 1.1 OS=Arabidopsis thaliana GN=NRT1.1 PE=1 SV=1
SRS0168	AGO1B_ORYSJ	Drought	sp|Q7XSA2|AGO1B_ORYSJ Protein argonaute 1B OS=Oryza sativa subsp. japonica GN=AGO1B PE=2 SV=3
SRS0218	CIPKN_ORYSJ	Drought	sp|Q6ZLP5|CIPKN_ORYSJ CBL-interacting protein kinase 23 OS=Oryza sativa subsp. japonica GN=CIPK23 PE=2 SV=1
SRS0292	CIPK9_ORYSJ	Drought	sp|Q10SC8|CIPK9_ORYSJ CBL-interacting protein kinase 9 OS=Oryza sativa subsp. japonica GN=CIPK9 PE=2 SV=1
SRS0345	RCI2A_ARATH	Drought	sp|Q9ZNQ7|RCI2A_ARATH Hydrophobic protein RCI2A OS=Arabidopsis thaliana GN=RCI2A PE=2 SV=1
SRS0362	CYSP_PEA	Drought	sp|P25804|CYSP_PEA Cysteine proteinase 15A OS=Pisum sativum PE=1 SV=1
SRS0378	ABA2_ARATH	Drought	sp|Q9C826|ABA2_ARATH Xanthoxin dehydrogenase OS=Arabidopsis thaliana GN=ABA2 PE=1 SV=1
SRS0445	NLTP2_ARATH	Drought	sp|Q9S7I3|NLTP2_ARATH Non-specific lipid-transfer protein 2 OS=Arabidopsis thaliana GN=LTP2 PE=3 SV=1
SRS0449	SDIR1_ARATH	Drought	sp|Q9M2S6|SDIR1_ARATH E3 ubiquitin-protein ligase SDIR1 OS=Arabidopsis thaliana GN=SDIR1 PE=1 SV=1
SRS0465	ACCO_DIOKA	Drought	sp|Q8S932|ACCO_DIOKA 1-aminocyclopropane-1-carboxylate oxidase OS=Diospyros kaki GN=DK-ACO1 PE=2 SV=1
SRS0481	LTI6A_ORYSJ	Drought	sp|Q8H5T6|LTI6A_ORYSJ Hydrophobic protein LTI6A OS=Oryza sativa subsp. japonica GN=LTI6A PE=2 SV=1
SRS0482	SDIR1_ARATH	Drought	sp|Q9M2S6|SDIR1_ARATH E3 ubiquitin-protein ligase SDIR1 OS=Arabidopsis thaliana GN=SDIR1 PE=1 SV=1
SRS0489	HIP26_ARATH	Drought	sp|Q9SZN7|HIP26_ARATH Heavy metal-associated isoprenylated plant protein 26 OS=Arabidopsis thaliana GN=HIPP26 PE=1 SV=1
SRS0491	ABA2_ARATH	Drought	sp|Q9C826|ABA2_ARATH Xanthoxin dehydrogenase OS=Arabidopsis thaliana GN=ABA2 PE=1 SV=1
SRS0508	CYSP1_MAIZE	Drought	sp|Q10716|CYSP1_MAIZE Cysteine proteinase 1 OS=Zea mays GN=CCP1 PE=2 SV=1
SRS0530	HDT3_ARATH	Drought	sp|Q9LZR5|HDT3_ARATH Histone deacetylase HDT3 OS=Arabidopsis thaliana GN=HDT3 PE=2 SV=2
SRS0548	ERF78_ARATH	Drought	sp|O80340|ERF78_ARATH Ethylene-responsive transcription factor 4 OS=Arabidopsis thaliana GN=ERF4 PE=1 SV=1
SRS0619	ALDR_HORVU	Drought	sp|P23901|ALDR_HORVU Aldose reductase OS=Hordeum vulgare PE=1 SV=1
SRS0649	AI5L7_ARATH	Drought	sp|Q9M7Q2|AI5L7_ARATH ABSCISIC ACID-INSENSITIVE 5-like protein 7 OS=Arabidopsis thaliana GN=ABF4 PE=1 SV=1
SRS0661	NAC19_ARATH	Drought	sp|Q9C932|NAC19_ARATH NAC domain-containing protein 19 OS=Arabidopsis thaliana GN=NAC019 PE=1 SV=1
SRS0673	HDT3_ARATH	Drought	sp|Q9LZR5|HDT3_ARATH Histone deacetylase HDT3 OS=Arabidopsis thaliana GN=HDT3 PE=2 SV=2
SRS0697	NAC72_ARATH	Drought	sp|Q93VY3|NAC72_ARATH NAC domain-containing protein 72 OS=Arabidopsis thaliana GN=NAC072 PE=2 SV=1
SRS0699	ASPG1_ARATH	Drought	sp|Q9LS40|ASPG1_ARATH Protein ASPARTIC PROTEASE IN GUARD CELL 1 OS=Arabidopsis thaliana GN=ASPG1 PE=1 SV=1
SRS0711	ERD6_ARATH	Drought	sp|O04036|ERD6_ARATH Sugar transporter ERD6 OS=Arabidopsis thaliana GN=ERD6 PE=1 SV=3
SRS0718	CNBL8_ORYSJ	Drought	sp|Q3HRN9|CNBL8_ORYSJ Calcineurin B-like protein 8 OS=Oryza sativa subsp. japonica GN=CBL8 PE=2 SV=1
SRS0781	HIP26_ARATH	Drought	sp|Q9SZN7|HIP26_ARATH Heavy metal-associated isoprenylated plant protein 26 OS=Arabidopsis thaliana GN=HIPP26 PE=1 SV=1
SRS0861	SDIR1_ARATH	Drought	sp|Q9M2S6|SDIR1_ARATH E3 ubiquitin-protein ligase SDIR1 OS=Arabidopsis thaliana GN=SDIR1 PE=1 SV=1
SRS0887	SDIR1_ARATH	Drought	sp|Q9M2S6|SDIR1_ARATH E3 ubiquitin-protein ligase SDIR1 OS=Arabidopsis thaliana GN=SDIR1 PE=1 SV=1
SRS0897	CYT1_MAIZE	Drought	sp|P31726|CYT1_MAIZE Cystatin-1 OS=Zea mays GN=RAMDAZC7 PE=2 SV=1
SRS0919	NFYB1_ARATH	Drought	sp|Q9SLG0|NFYB1_ARATH Nuclear transcription factor Y subunit B-1 OS=Arabidopsis thaliana GN=NFYB1 PE=1 SV=2
SRS0928	METK2_ORYSJ	Drought	sp|P93438|METK2_ORYSJ S-adenosylmethionine synthase 2 OS=Oryza sativa subsp. japonica GN=SAM2 PE=1 SV=1
SRS0932	C3H20_ARATH	Drought	sp|O82199|C3H20_ARATH Zinc finger CCCH domain-containing protein 20 OS=Arabidopsis thaliana GN=At2g19810 PE=2 SV=1
SRS1022	SAP8_ORYSJ	Drought	sp|A3BDI8|SAP8_ORYSJ Zinc finger A20 and AN1 domain-containing stress-associated protein 8 OS=Oryza sativa subsp. japonica GN=SAP8 PE=2 SV=1
SRS1023	NFYA5_ARATH	Drought	sp|Q9SYH4|NFYA5_ARATH Nuclear transcription factor Y subunit A-5 OS=Arabidopsis thaliana GN=NFYA5 PE=2 SV=1
SRS1038	ABAH3_ARATH	Drought	sp|Q9FH76|ABAH3_ARATH Abscisic acid 8'-hydroxylase 3 OS=Arabidopsis thaliana GN=CYP707A3 PE=1 SV=1
SRS1118	CESA8_ARATH	Drought	sp|Q8LPK5|CESA8_ARATH Cellulose synthase A catalytic subunit 8 [UDP-forming] OS=Arabidopsis thaliana GN=CESA8 PE=1 SV=1
SRS1149	NFYB1_ARATH	Drought	sp|Q9SLG0|NFYB1_ARATH Nuclear transcription factor Y subunit B-1 OS=Arabidopsis thaliana GN=NFYB1 PE=1 SV=2
SRS1202	RMA1_CAPAN	Drought	sp|Q6R567|RMA1_CAPAN E3 ubiquitin-protein ligase RMA1H1 OS=Capsicum annuum GN=RMA1H1 PE=1 SV=1
SRS1248	ACCO_DIOKA	Drought	sp|Q8S932|ACCO_DIOKA 1-aminocyclopropane-1-carboxylate oxidase OS=Diospyros kaki GN=DK-ACO1 PE=2 SV=1
SRS1258	AVP1_ARATH	Drought	sp|P31414|AVP1_ARATH Pyrophosphate-energized vacuolar membrane proton pump 1 OS=Arabidopsis thaliana GN=AVP1 PE=1 SV=1
SRS1274	HIP26_ARATH	Drought	sp|Q9SZN7|HIP26_ARATH Heavy metal-associated isoprenylated plant protein 26 OS=Arabidopsis thaliana GN=HIPP26 PE=1 SV=1
SRS1282	PLDD1_ARATH	Drought	sp|Q9C5Y0|PLDD1_ARATH Phospholipase D delta OS=Arabidopsis thaliana GN=PLDDELTA PE=1 SV=2
SRS1289	ASPG1_ARATH	Drought	sp|Q9LS40|ASPG1_ARATH Protein ASPARTIC PROTEASE IN GUARD CELL 1 OS=Arabidopsis thaliana GN=ASPG1 PE=1 SV=1
SRS1304	GSTFA_ARATH	Drought	sp|P42761|GSTFA_ARATH Glutathione S-transferase F10 OS=Arabidopsis thaliana GN=GSTF10 PE=1 SV=3
SRS1309	CESA8_ARATH	Drought	sp|Q8LPK5|CESA8_ARATH Cellulose synthase A catalytic subunit 8 [UDP-forming] OS=Arabidopsis thaliana GN=CESA8 PE=1 SV=1
SRS1324	SLAC1_ARATH	Drought	sp|Q9LD83|SLAC1_ARATH Guard cell S-type anion channel SLAC1 OS=Arabidopsis thaliana GN=SLAC1 PE=1 SV=1
SRS1344	METK1_ARATH	Drought	sp|P23686|METK1_ARATH S-adenosylmethionine synthase 1 OS=Arabidopsis thaliana GN=SAM1 PE=1 SV=2
SRS1353	HIP26_ARATH	Drought	sp|Q9SZN7|HIP26_ARATH Heavy metal-associated isoprenylated plant protein 26 OS=Arabidopsis thaliana GN=HIPP26 PE=1 SV=1
SRS1444	CESA8_ARATH	Drought	sp|Q8LPK5|CESA8_ARATH Cellulose synthase A catalytic subunit 8 [UDP-forming] OS=Arabidopsis thaliana GN=CESA8 PE=1 SV=1
SRS1494	ABA2_ARATH	Drought	sp|Q9C826|ABA2_ARATH Xanthoxin dehydrogenase OS=Arabidopsis thaliana GN=ABA2 PE=1 SV=1
SRS1529	ABA2_ARATH	Drought	sp|Q9C826|ABA2_ARATH Xanthoxin dehydrogenase OS=Arabidopsis thaliana GN=ABA2 PE=1 SV=1
SRS1537	ABA2_ARATH	Drought	sp|Q9C826|ABA2_ARATH Xanthoxin dehydrogenase OS=Arabidopsis thaliana GN=ABA2 PE=1 SV=1
SRS1542	PTR7_ARATH	Drought	sp|Q05085|PTR7_ARATH Nitrate transporter 1.1 OS=Arabidopsis thaliana GN=NRT1.1 PE=1 SV=1
SRS1561	DRPE_CRAPL	Drought	sp|P22242|DRPE_CRAPL Desiccation-related protein PCC13-62 OS=Craterostigma plantagineum PE=2 SV=1
SRS1622	AHP1_ARATH	Drought	sp|Q9ZNV9|AHP1_ARATH Histidine-containing phosphotransfer protein 1 OS=Arabidopsis thaliana GN=AHP1 PE=1 SV=1
SRS1626	ABAH3_ARATH	Drought	sp|Q9FH76|ABAH3_ARATH Abscisic acid 8'-hydroxylase 3 OS=Arabidopsis thaliana GN=CYP707A3 PE=1 SV=1
SRS1645	ANXD1_ARATH	Drought	sp|Q9SYT0|ANXD1_ARATH Annexin D1 OS=Arabidopsis thaliana GN=ANN1 PE=1 SV=1
SRS1717	SDIR1_ARATH	Drought	sp|Q9M2S6|SDIR1_ARATH E3 ubiquitin-protein ligase SDIR1 OS=Arabidopsis thaliana GN=SDIR1 PE=1 SV=1
SRS1730	H1_SOLPN	Drought	sp|P40267|H1_SOLPN Histone H1 OS=Solanum pennellii PE=2 SV=1
SRS1763	ANXD2_ARATH	Drought	sp|Q9XEE2|ANXD2_ARATH Annexin D2 OS=Arabidopsis thaliana GN=ANN2 PE=2 SV=1
SRS1764	SDIR1_ARATH	Drought	sp|Q9M2S6|SDIR1_ARATH E3 ubiquitin-protein ligase SDIR1 OS=Arabidopsis thaliana GN=SDIR1 PE=1 SV=1
SRS1782	NAC19_ARATH	Drought	sp|Q9C932|NAC19_ARATH NAC domain-containing protein 19 OS=Arabidopsis thaliana GN=NAC019 PE=1 SV=1
SRS1795	ASPG1_ARATH	Drought	sp|Q9LS40|ASPG1_ARATH Protein ASPARTIC PROTEASE IN GUARD CELL 1 OS=Arabidopsis thaliana GN=ASPG1 PE=1 SV=1
SRS1808	HIP26_ARATH	Drought	sp|Q9SZN7|HIP26_ARATH Heavy metal-associated isoprenylated plant protein 26 OS=Arabidopsis thaliana GN=HIPP26 PE=1 SV=1
SRS1833	ASPG1_ARATH	Drought	sp|Q9LS40|ASPG1_ARATH Protein ASPARTIC PROTEASE IN GUARD CELL 1 OS=Arabidopsis thaliana GN=ASPG1 PE=1 SV=1
SRS1914	LAC2_ARATH	Drought	sp|O81081|LAC2_ARATH Laccase-2 OS=Arabidopsis thaliana GN=LAC2 PE=2 SV=1
SRS1946	CESA8_ARATH	Drought	sp|Q8LPK5|CESA8_ARATH Cellulose synthase A catalytic subunit 8 [UDP-forming] OS=Arabidopsis thaliana GN=CESA8 PE=1 SV=1
SRS1948	SAP1_ORYSJ	Drought	sp|A3C039|SAP1_ORYSJ Zinc finger A20 and AN1 domain-containing stress-associated protein 1 OS=Oryza sativa subsp. japonica GN=SAP1 PE=2 SV=2
SRS1985	ABR1_ARATH	Drought	sp|Q9FGF8|ABR1_ARATH Ethylene-responsive transcription factor ABR1 OS=Arabidopsis thaliana GN=ABR1 PE=2 SV=1
SRS2009	SDIR1_ARATH	Drought	sp|Q9M2S6|SDIR1_ARATH E3 ubiquitin-protein ligase SDIR1 OS=Arabidopsis thaliana GN=SDIR1 PE=1 SV=1
SRS2065	SAP8_ORYSJ	Drought	sp|A3BDI8|SAP8_ORYSJ Zinc finger A20 and AN1 domain-containing stress-associated protein 8 OS=Oryza sativa subsp. japonica GN=SAP8 PE=2 SV=1
SRS2146	AVP1_ARATH	Drought	sp|P31414|AVP1_ARATH Pyrophosphate-energized vacuolar membrane proton pump 1 OS=Arabidopsis thaliana GN=AVP1 PE=1 SV=1
SRS2205	MY1R1_SOLTU	Drought	sp|Q2V9B0|MY1R1_SOLTU Transcription factor MYB1R1 OS=Solanum tuberosum PE=2 SV=1
SRS2236	PAL1_ARATH	Drought	sp|P35510|PAL1_ARATH Phenylalanine ammonia-lyase 1 OS=Arabidopsis thaliana GN=PAL1 PE=1 SV=3
SRS2289	SAP1_ORYSJ	Drought	sp|A3C039|SAP1_ORYSJ Zinc finger A20 and AN1 domain-containing stress-associated protein 1 OS=Oryza sativa subsp. japonica GN=SAP1 PE=2 SV=2
SRS2295	CDPK3_ARATH	Drought	sp|Q42479|CDPK3_ARATH Calcium-dependent protein kinase 3 OS=Arabidopsis thaliana GN=CPK3 PE=1 SV=1
SRS2303	ANXD5_ARATH	Drought	sp|Q9C9X3|ANXD5_ARATH Annexin D5 OS=Arabidopsis thaliana GN=ANN5 PE=2 SV=2
SRS2318	TIP23_MAIZE	Drought	sp|Q84RL6|TIP23_MAIZE Aquaporin TIP2-3 OS=Zea mays GN=TIP2-3 PE=2 SV=2
SRS2320	ABA2_ARATH	Drought	sp|Q9C826|ABA2_ARATH Xanthoxin dehydrogenase OS=Arabidopsis thaliana GN=ABA2 PE=1 SV=1
SRS2324	PTR7_ARATH	Drought	sp|Q05085|PTR7_ARATH Nitrate transporter 1.1 OS=Arabidopsis thaliana GN=NRT1.1 PE=1 SV=1
SRS2340	ASPG1_ARATH	Drought	sp|Q9LS40|ASPG1_ARATH Protein ASPARTIC PROTEASE IN GUARD CELL 1 OS=Arabidopsis thaliana GN=ASPG1 PE=1 SV=1
SRS2343	NAC72_ARATH	Drought	sp|Q93VY3|NAC72_ARATH NAC domain-containing protein 72 OS=Arabidopsis thaliana GN=NAC072 PE=2 SV=1
SRS2367	PTR7_ARATH	Drought	sp|Q05085|PTR7_ARATH Nitrate transporter 1.1 OS=Arabidopsis thaliana GN=NRT1.1 PE=1 SV=1
SRS2387	CLPD_ARATH	Drought	sp|P42762|CLPD_ARATH Chaperone protein ClpD, chloroplastic OS=Arabidopsis thaliana GN=CLPD PE=1 SV=1
SRS2395	METK2_ORYSJ	Drought	sp|P93438|METK2_ORYSJ S-adenosylmethionine synthase 2 OS=Oryza sativa subsp. japonica GN=SAM2 PE=1 SV=1
SRS2398	PTR7_ARATH	Drought	sp|Q05085|PTR7_ARATH Nitrate transporter 1.1 OS=Arabidopsis thaliana GN=NRT1.1 PE=1 SV=1
SRS2414	CTL1_ARATH	Drought	sp|Q9MA41|CTL1_ARATH Chitinase-like protein 1 OS=Arabidopsis thaliana GN=CTL1 PE=1 SV=1
SRS2416	ASPG1_ARATH	Drought	sp|Q9LS40|ASPG1_ARATH Protein ASPARTIC PROTEASE IN GUARD CELL 1 OS=Arabidopsis thaliana GN=ASPG1 PE=1 SV=1
SRS2451	ALDR_HORVU	Drought	sp|P23901|ALDR_HORVU Aldose reductase OS=Hordeum vulgare PE=1 SV=1
SRS2493	METK2_ORYSJ	Drought	sp|P93438|METK2_ORYSJ S-adenosylmethionine synthase 2 OS=Oryza sativa subsp. japonica GN=SAM2 PE=1 SV=1
CO000117	EXPA5_ORYSJ	Flooding	sp|Q6ZGU9|EXPA5_ORYSJ Expansin-A5 OS=Oryza sativa subsp. japonica GN=EXPA5 PE=2 SV=1
CO000512	RLA0_MAIZE	Flooding	sp|O24573|RLA0_MAIZE 60S acidic ribosomal protein P0 OS=Zea mays GN=RP-P0 PE=1 SV=3
CO000177	HBL1_MEDSA	Flooding	sp|Q9FVL0|HBL1_MEDSA Non-symbiotic hemoglobin 1 OS=Medicago sativa GN=MHB1 PE=2 SV=1
CO000207	RLA0_MAIZE	Flooding	sp|O24573|RLA0_MAIZE 60S acidic ribosomal protein P0 OS=Zea mays GN=RP-P0 PE=1 SV=3
CO000286	EXPA5_ORYSJ	Flooding	sp|Q6ZGU9|EXPA5_ORYSJ Expansin-A5 OS=Oryza sativa subsp. japonica GN=EXPA5 PE=2 SV=1
CO000410	RLA0_MAIZE	Flooding	sp|O24573|RLA0_MAIZE 60S acidic ribosomal protein P0 OS=Zea mays GN=RP-P0 PE=1 SV=3
SRS0452	C3H29_ARATH	Flooding	sp|Q9XEE6|C3H29_ARATH Zinc finger CCCH domain-containing protein 29 OS=Arabidopsis thaliana GN=At2g40140 PE=2 SV=1
SRS0732	EXP11_ORYSJ	Flooding	sp|Q4PNY1|EXP11_ORYSJ Expansin-A11 OS=Oryza sativa subsp. japonica GN=EXPA11 PE=2 SV=2
SRS1028	PDC2_MAIZE	Flooding	sp|Q05326|PDC2_MAIZE Pyruvate decarboxylase 2 (Fragment) OS=Zea mays GN=PDC2 PE=2 SV=1
SRS1363	EXPA5_ORYSJ	Flooding	sp|Q6ZGU9|EXPA5_ORYSJ Expansin-A5 OS=Oryza sativa subsp. japonica GN=EXPA5 PE=2 SV=1
SRS1410	EXPA5_ORYSJ	Flooding	sp|Q6ZGU9|EXPA5_ORYSJ Expansin-A5 OS=Oryza sativa subsp. japonica GN=EXPA5 PE=2 SV=1
SRS1753	C3H29_ARATH	Flooding	sp|Q9XEE6|C3H29_ARATH Zinc finger CCCH domain-containing protein 29 OS=Arabidopsis thaliana GN=At2g40140 PE=2 SV=1
SRS2185	EXPA5_ORYSJ	Flooding	sp|Q6ZGU9|EXPA5_ORYSJ Expansin-A5 OS=Oryza sativa subsp. japonica GN=EXPA5 PE=2 SV=1
SRS2302	C3H29_ARATH	Flooding	sp|Q9XEE6|C3H29_ARATH Zinc finger CCCH domain-containing protein 29 OS=Arabidopsis thaliana GN=At2g40140 PE=2 SV=1
CO000382	PSBS_ARATH	light	sp|Q9XF91|PSBS_ARATH Photosystem II 22 kDa protein, chloroplastic OS=Arabidopsis thaliana GN=PSBS PE=2 SV=1
CO000527	CML24_ARATH	light	sp|P25070|CML24_ARATH Calcium-binding protein CML24 OS=Arabidopsis thaliana GN=CML24 PE=2 SV=2
CO000120	CB21_MAIZE	light	sp|P12329|CB21_MAIZE Chlorophyll a-b binding protein 1, chloroplastic OS=Zea mays GN=CAB1 PE=3 SV=1
CO000441	PIP12_ORYSJ	light	sp|Q7XSQ9|PIP12_ORYSJ Probable aquaporin PIP1-2 OS=Oryza sativa subsp. japonica GN=PIP1-2 PE=2 SV=3
CO000505	CP18C_ARATH	light	sp|P34790|CP18C_ARATH Peptidyl-prolyl cis-trans isomerase CYP18-3 OS=Arabidopsis thaliana GN=CYP18-3 PE=1 SV=1
CO000577	COP10_ARATH	light	sp|Q9LJD7|COP10_ARATH Constitutive photomorphogenesis protein 10 OS=Arabidopsis thaliana GN=COP10 PE=1 SV=1
CO000358	TAF1B_ARATH	light	sp|Q6PUA2|TAF1B_ARATH Transcription initiation factor TFIID subunit 1-B OS=Arabidopsis thaliana GN=HAF2 PE=2 SV=1
CO000200	PIP23_ORYSJ	light	sp|Q7XUA6|PIP23_ORYSJ Probable aquaporin PIP2-3 OS=Oryza sativa subsp. japonica GN=PIP2-3 PE=2 SV=1
CO000377	CAHC_ARATH	light	sp|P27140|CAHC_ARATH Carbonic anhydrase, chloroplastic OS=Arabidopsis thaliana GN=CA1 PE=1 SV=2
CO000362	C71B2_ARATH	light	sp|O65788|C71B2_ARATH Cytochrome P450 71B2 OS=Arabidopsis thaliana GN=CYP71B2 PE=2 SV=2
CO000246	NDK1_PEA	light	sp|P47922|NDK1_PEA Nucleoside diphosphate kinase 1 OS=Pisum sativum GN=NDPK1 PE=1 SV=1
CO000147	CAH2_ARATH	light	sp|P42737|CAH2_ARATH Carbonic anhydrase 2, chloroplastic OS=Arabidopsis thaliana GN=CA2 PE=1 SV=2
CO000328	ACBP6_ARATH	light	sp|P57752|ACBP6_ARATH Acyl-CoA-binding domain-containing protein 6 OS=Arabidopsis thaliana GN=ACBP6 PE=1 SV=1
CO000493	GGAP1_ARATH	light	sp|Q8RWE8|GGAP1_ARATH GDP-L-galactose phosphorylase 1 OS=Arabidopsis thaliana GN=VTC2 PE=1 SV=1
CO000119	C71B2_ARATH	light	sp|O65788|C71B2_ARATH Cytochrome P450 71B2 OS=Arabidopsis thaliana GN=CYP71B2 PE=2 SV=2
CO000148	CB21_MAIZE	light	sp|P12329|CB21_MAIZE Chlorophyll a-b binding protein 1, chloroplastic OS=Zea mays GN=CAB1 PE=3 SV=1
CO000408	PSBS_ARATH	light	sp|Q9XF91|PSBS_ARATH Photosystem II 22 kDa protein, chloroplastic OS=Arabidopsis thaliana GN=PSBS PE=2 SV=1
CO000082	TAF1B_ARATH	light	sp|Q6PUA2|TAF1B_ARATH Transcription initiation factor TFIID subunit 1-B OS=Arabidopsis thaliana GN=HAF2 PE=2 SV=1
CO000623	CSN2_ARATH	light	sp|Q8W207|CSN2_ARATH COP9 signalosome complex subunit 2 OS=Arabidopsis thaliana GN=CSN2 PE=1 SV=1
CO000186	ACT7_ARATH	light	sp|P53492|ACT7_ARATH Actin-7 OS=Arabidopsis thaliana GN=ACT7 PE=1 SV=1
CO000090	CB21_MAIZE	light	sp|P12329|CB21_MAIZE Chlorophyll a-b binding protein 1, chloroplastic OS=Zea mays GN=CAB1 PE=3 SV=1
CO000274	COP10_ARATH	light	sp|Q9LJD7|COP10_ARATH Constitutive photomorphogenesis protein 10 OS=Arabidopsis thaliana GN=COP10 PE=1 SV=1
CO000160	COP10_ARATH	light	sp|Q9LJD7|COP10_ARATH Constitutive photomorphogenesis protein 10 OS=Arabidopsis thaliana GN=COP10 PE=1 SV=1
CO000580	LHY_ARATH	light	sp|Q6R0H1|LHY_ARATH Protein LHY OS=Arabidopsis thaliana GN=LHY PE=1 SV=2
CO000419	GSTUH_ARATH	light	sp|Q9FUS8|GSTUH_ARATH Glutathione S-transferase U17 OS=Arabidopsis thaliana GN=GSTU17 PE=2 SV=1
CO000027	COP10_ARATH	light	sp|Q9LJD7|COP10_ARATH Constitutive photomorphogenesis protein 10 OS=Arabidopsis thaliana GN=COP10 PE=1 SV=1
CO000053	CP18C_ARATH	light	sp|P34790|CP18C_ARATH Peptidyl-prolyl cis-trans isomerase CYP18-3 OS=Arabidopsis thaliana GN=CYP18-3 PE=1 SV=1
CO000113	PSBO2_ARATH	light	sp|Q9S841|PSBO2_ARATH Oxygen-evolving enhancer protein 1-2, chloroplastic OS=Arabidopsis thaliana GN=PSBO2 PE=1 SV=1
CO000442	MDHM1_ARATH	light	sp|Q9ZP06|MDHM1_ARATH Malate dehydrogenase 1, mitochondrial OS=Arabidopsis thaliana GN=At1g53240 PE=1 SV=1
CO000470	TAAC_ARATH	light	sp|Q9M024|TAAC_ARATH Thylakoid ADP,ATP carrier protein, chloroplastic OS=Arabidopsis thaliana GN=TAAC PE=1 SV=1
CO000313	PLAS2_ARATH	light	sp|P42699|PLAS2_ARATH Plastocyanin major isoform, chloroplastic OS=Arabidopsis thaliana GN=DRT112 PE=1 SV=2
CO000197	TAF1B_ARATH	light	sp|Q6PUA2|TAF1B_ARATH Transcription initiation factor TFIID subunit 1-B OS=Arabidopsis thaliana GN=HAF2 PE=2 SV=1
CO000234	CB21_MAIZE	light	sp|P12329|CB21_MAIZE Chlorophyll a-b binding protein 1, chloroplastic OS=Zea mays GN=CAB1 PE=3 SV=1
CO000002	CB21_MAIZE	light	sp|P12329|CB21_MAIZE Chlorophyll a-b binding protein 1, chloroplastic OS=Zea mays GN=CAB1 PE=3 SV=1
CO000225	PIP12_ORYSJ	light	sp|Q7XSQ9|PIP12_ORYSJ Probable aquaporin PIP1-2 OS=Oryza sativa subsp. japonica GN=PIP1-2 PE=2 SV=3
CO000600	MD37F_ARATH	light	sp|Q39043|MD37F_ARATH Mediator of RNA polymerase II transcription subunit 37f OS=Arabidopsis thaliana GN=MED37F PE=1 SV=2
CO000413	NDK1_PEA	light	sp|P47922|NDK1_PEA Nucleoside diphosphate kinase 1 OS=Pisum sativum GN=NDPK1 PE=1 SV=1
CO000334	CB21_MAIZE	light	sp|P12329|CB21_MAIZE Chlorophyll a-b binding protein 1, chloroplastic OS=Zea mays GN=CAB1 PE=3 SV=1
CO000270	PIP25_MAIZE	light	sp|Q9XF58|PIP25_MAIZE Aquaporin PIP2-5 OS=Zea mays GN=PIP2-5 PE=1 SV=1
CO000502	PIP12_ORYSJ	light	sp|Q7XSQ9|PIP12_ORYSJ Probable aquaporin PIP1-2 OS=Oryza sativa subsp. japonica GN=PIP1-2 PE=2 SV=3
CO000205	CB21_MAIZE	light	sp|P12329|CB21_MAIZE Chlorophyll a-b binding protein 1, chloroplastic OS=Zea mays GN=CAB1 PE=3 SV=1
CO000366	CML24_ARATH	light	sp|P25070|CML24_ARATH Calcium-binding protein CML24 OS=Arabidopsis thaliana GN=CML24 PE=2 SV=2
CO000567	FHY3_ARATH	light	sp|Q9LIE5|FHY3_ARATH Protein FAR-RED ELONGATED HYPOCOTYL 3 OS=Arabidopsis thaliana GN=FHY3 PE=1 SV=1
CO000170	FTSH5_ARATH	light	sp|Q9FH02|FTSH5_ARATH ATP-dependent zinc metalloprotease FTSH 5, chloroplastic OS=Arabidopsis thaliana GN=FTSH5 PE=1 SV=1
CO000528	TAAC_ARATH	light	sp|Q9M024|TAAC_ARATH Thylakoid ADP,ATP carrier protein, chloroplastic OS=Arabidopsis thaliana GN=TAAC PE=1 SV=1
CO000057	CML24_ARATH	light	sp|P25070|CML24_ARATH Calcium-binding protein CML24 OS=Arabidopsis thaliana GN=CML24 PE=2 SV=2
CO000284	TAF1B_ARATH	light	sp|Q6PUA2|TAF1B_ARATH Transcription initiation factor TFIID subunit 1-B OS=Arabidopsis thaliana GN=HAF2 PE=2 SV=1
CO000006	CB21_MAIZE	light	sp|P12329|CB21_MAIZE Chlorophyll a-b binding protein 1, chloroplastic OS=Zea mays GN=CAB1 PE=3 SV=1
CO000039	PIP25_MAIZE	light	sp|Q9XF58|PIP25_MAIZE Aquaporin PIP2-5 OS=Zea mays GN=PIP2-5 PE=1 SV=1
CO000507	CFI1_ARATH	light	sp|P41088|CFI1_ARATH Chalcone--flavonone isomerase 1 OS=Arabidopsis thaliana GN=CHI1 PE=1 SV=2
CO000015	C83B1_ARATH	light	sp|O65782|C83B1_ARATH Cytochrome P450 83B1 OS=Arabidopsis thaliana GN=CYP83B1 PE=1 SV=1
CO000589	DR100_ARATH	light	sp|Q00874|DR100_ARATH DNA-damage-repair/toleration protein DRT100 OS=Arabidopsis thaliana GN=DRT100 PE=2 SV=2
CO000627	CP18C_ARATH	light	sp|P34790|CP18C_ARATH Peptidyl-prolyl cis-trans isomerase CYP18-3 OS=Arabidopsis thaliana GN=CYP18-3 PE=1 SV=1
CO000052	CB21_MAIZE	light	sp|P12329|CB21_MAIZE Chlorophyll a-b binding protein 1, chloroplastic OS=Zea mays GN=CAB1 PE=3 SV=1
CO000107	BCB1_ARATH	light	sp|Q07488|BCB1_ARATH Blue copper protein OS=Arabidopsis thaliana GN=BCB PE=1 SV=2
CO000179	COP10_ARATH	light	sp|Q9LJD7|COP10_ARATH Constitutive photomorphogenesis protein 10 OS=Arabidopsis thaliana GN=COP10 PE=1 SV=1
CO000525	TAF1B_ARATH	light	sp|Q6PUA2|TAF1B_ARATH Transcription initiation factor TFIID subunit 1-B OS=Arabidopsis thaliana GN=HAF2 PE=2 SV=1
CO000621	C71B2_ARATH	light	sp|O65788|C71B2_ARATH Cytochrome P450 71B2 OS=Arabidopsis thaliana GN=CYP71B2 PE=2 SV=2
CO000196	COP10_ARATH	light	sp|Q9LJD7|COP10_ARATH Constitutive photomorphogenesis protein 10 OS=Arabidopsis thaliana GN=COP10 PE=1 SV=1
CO000562	CB21_MAIZE	light	sp|P12329|CB21_MAIZE Chlorophyll a-b binding protein 1, chloroplastic OS=Zea mays GN=CAB1 PE=3 SV=1
CO000294	COP10_ARATH	light	sp|Q9LJD7|COP10_ARATH Constitutive photomorphogenesis protein 10 OS=Arabidopsis thaliana GN=COP10 PE=1 SV=1
CO000399	COP10_ARATH	light	sp|Q9LJD7|COP10_ARATH Constitutive photomorphogenesis protein 10 OS=Arabidopsis thaliana GN=COP10 PE=1 SV=1
CO000078	HEM12_ARATH	light	sp|P49294|HEM12_ARATH Glutamyl-tRNA reductase 2, chloroplastic OS=Arabidopsis thaliana GN=HEMA2 PE=2 SV=2
CO000492	FER1_MAIZE	light	sp|P27787|FER1_MAIZE Ferredoxin-1, chloroplastic OS=Zea mays GN=FDX1 PE=1 SV=1
CO000019	TAF1B_ARATH	light	sp|Q6PUA2|TAF1B_ARATH Transcription initiation factor TFIID subunit 1-B OS=Arabidopsis thaliana GN=HAF2 PE=2 SV=1
CO000227	CB21_MAIZE	light	sp|P12329|CB21_MAIZE Chlorophyll a-b binding protein 1, chloroplastic OS=Zea mays GN=CAB1 PE=3 SV=1
CO000124	CB21_MAIZE	light	sp|P12329|CB21_MAIZE Chlorophyll a-b binding protein 1, chloroplastic OS=Zea mays GN=CAB1 PE=3 SV=1
SRS0094	CB21_MAIZE	light	sp|P12329|CB21_MAIZE Chlorophyll a-b binding protein 1, chloroplastic OS=Zea mays GN=CAB1 PE=3 SV=1
SRS0191	PIP12_ARATH	light	sp|Q06611|PIP12_ARATH Aquaporin PIP1-2 OS=Arabidopsis thaliana GN=PIP1-2 PE=1 SV=1
SRS0208	S17P_ARATH	light	sp|P46283|S17P_ARATH Sedoheptulose-1,7-bisphosphatase, chloroplastic OS=Arabidopsis thaliana GN=At3g55800 PE=1 SV=1
SRS0223	CB21_MAIZE	light	sp|P12329|CB21_MAIZE Chlorophyll a-b binding protein 1, chloroplastic OS=Zea mays GN=CAB1 PE=3 SV=1
SRS0227	CML24_ARATH	light	sp|P25070|CML24_ARATH Calcium-binding protein CML24 OS=Arabidopsis thaliana GN=CML24 PE=2 SV=2
SRS0232	DDB1B_ARATH	light	sp|O49552|DDB1B_ARATH DNA damage-binding protein 1b OS=Arabidopsis thaliana GN=DDB1B PE=2 SV=2
SRS0256	MD37F_ARATH	light	sp|Q39043|MD37F_ARATH Mediator of RNA polymerase II transcription subunit 37f OS=Arabidopsis thaliana GN=MED37F PE=1 SV=2
SRS0305	CP122_ARATH	light	sp|Q9LZP9|CP122_ARATH Calvin cycle protein CP12-2, chloroplastic OS=Arabidopsis thaliana GN=CP12-2 PE=1 SV=1
SRS0332	CAH2_ARATH	light	sp|P42737|CAH2_ARATH Carbonic anhydrase 2, chloroplastic OS=Arabidopsis thaliana GN=CA2 PE=1 SV=2
SRS0415	KNAT4_ARATH	light	sp|P48001|KNAT4_ARATH Homeobox protein knotted-1-like 4 OS=Arabidopsis thaliana GN=KNAT4 PE=2 SV=3
SRS0420	VATA_MAIZE	light	sp|P49087|VATA_MAIZE V-type proton ATPase catalytic subunit A (Fragment) OS=Zea mays PE=1 SV=1
SRS0474	CP122_ARATH	light	sp|Q9LZP9|CP122_ARATH Calvin cycle protein CP12-2, chloroplastic OS=Arabidopsis thaliana GN=CP12-2 PE=1 SV=1
SRS0500	TAF1B_ARATH	light	sp|Q6PUA2|TAF1B_ARATH Transcription initiation factor TFIID subunit 1-B OS=Arabidopsis thaliana GN=HAF2 PE=2 SV=1
SRS0527	CB21_MAIZE	light	sp|P12329|CB21_MAIZE Chlorophyll a-b binding protein 1, chloroplastic OS=Zea mays GN=CAB1 PE=3 SV=1
SRS0552	TAF1B_ARATH	light	sp|Q6PUA2|TAF1B_ARATH Transcription initiation factor TFIID subunit 1-B OS=Arabidopsis thaliana GN=HAF2 PE=2 SV=1
SRS0555	CP20C_ARATH	light	sp|P34791|CP20C_ARATH Peptidyl-prolyl cis-trans isomerase CYP20-3, chloroplastic OS=Arabidopsis thaliana GN=CYP20-3 PE=1 SV=1
SRS0563	GGAP1_ARATH	light	sp|Q8RWE8|GGAP1_ARATH GDP-L-galactose phosphorylase 1 OS=Arabidopsis thaliana GN=VTC2 PE=1 SV=1
SRS0569	CAH2_ARATH	light	sp|P42737|CAH2_ARATH Carbonic anhydrase 2, chloroplastic OS=Arabidopsis thaliana GN=CA2 PE=1 SV=2
SRS0578	FER5_MAIZE	light	sp|P27789|FER5_MAIZE Ferredoxin-5, chloroplastic OS=Zea mays GN=FDX5 PE=2 SV=1
SRS0581	FTSH1_ORYSJ	light	sp|Q5Z974|FTSH1_ORYSJ ATP-dependent zinc metalloprotease FTSH 1, chloroplastic OS=Oryza sativa subsp. japonica GN=FTSH1 PE=2 SV=1
SRS0646	C71B2_ARATH	light	sp|O65788|C71B2_ARATH Cytochrome P450 71B2 OS=Arabidopsis thaliana GN=CYP71B2 PE=2 SV=2
SRS0671	C71B2_ARATH	light	sp|O65788|C71B2_ARATH Cytochrome P450 71B2 OS=Arabidopsis thaliana GN=CYP71B2 PE=2 SV=2
SRS0701	FER1_ARATH	light	sp|O04090|FER1_ARATH Ferredoxin-1, chloroplastic OS=Arabidopsis thaliana GN=FD1 PE=1 SV=1
SRS0747	C83B1_ARATH	light	sp|O65782|C83B1_ARATH Cytochrome P450 83B1 OS=Arabidopsis thaliana GN=CYP83B1 PE=1 SV=1
SRS0766	ACT7_ARATH	light	sp|P53492|ACT7_ARATH Actin-7 OS=Arabidopsis thaliana GN=ACT7 PE=1 SV=1
SRS0775	TAF1B_ARATH	light	sp|Q6PUA2|TAF1B_ARATH Transcription initiation factor TFIID subunit 1-B OS=Arabidopsis thaliana GN=HAF2 PE=2 SV=1
SRS0786	CML24_ARATH	light	sp|P25070|CML24_ARATH Calcium-binding protein CML24 OS=Arabidopsis thaliana GN=CML24 PE=2 SV=2
SRS0795	TAF1B_ARATH	light	sp|Q6PUA2|TAF1B_ARATH Transcription initiation factor TFIID subunit 1-B OS=Arabidopsis thaliana GN=HAF2 PE=2 SV=1
SRS0804	NIA1_MAIZE	light	sp|P17571|NIA1_MAIZE Nitrate reductase [NADH] (Fragment) OS=Zea mays PE=1 SV=2
SRS0816	SODC2_ARATH	light	sp|O78310|SODC2_ARATH Superoxide dismutase [Cu-Zn] 2, chloroplastic OS=Arabidopsis thaliana GN=CSD2 PE=1 SV=2
SRS0829	S17P_ARATH	light	sp|P46283|S17P_ARATH Sedoheptulose-1,7-bisphosphatase, chloroplastic OS=Arabidopsis thaliana GN=At3g55800 PE=1 SV=1
SRS0840	LHY_ARATH	light	sp|Q6R0H1|LHY_ARATH Protein LHY OS=Arabidopsis thaliana GN=LHY PE=1 SV=2
SRS0873	FTSH1_ORYSJ	light	sp|Q5Z974|FTSH1_ORYSJ ATP-dependent zinc metalloprotease FTSH 1, chloroplastic OS=Oryza sativa subsp. japonica GN=FTSH1 PE=2 SV=1
SRS0881	CML24_ARATH	light	sp|P25070|CML24_ARATH Calcium-binding protein CML24 OS=Arabidopsis thaliana GN=CML24 PE=2 SV=2
SRS0886	COP1_ARATH	light	sp|P43254|COP1_ARATH E3 ubiquitin-protein ligase COP1 OS=Arabidopsis thaliana GN=COP1 PE=1 SV=2
SRS0911	COP10_ARATH	light	sp|Q9LJD7|COP10_ARATH Constitutive photomorphogenesis protein 10 OS=Arabidopsis thaliana GN=COP10 PE=1 SV=1
SRS0920	C71B2_ARATH	light	sp|O65788|C71B2_ARATH Cytochrome P450 71B2 OS=Arabidopsis thaliana GN=CYP71B2 PE=2 SV=2
SRS0947	CB21_MAIZE	light	sp|P12329|CB21_MAIZE Chlorophyll a-b binding protein 1, chloroplastic OS=Zea mays GN=CAB1 PE=3 SV=1
SRS0970	BCB1_ARATH	light	sp|Q07488|BCB1_ARATH Blue copper protein OS=Arabidopsis thaliana GN=BCB PE=1 SV=2
SRS0985	C83B1_ARATH	light	sp|O65782|C83B1_ARATH Cytochrome P450 83B1 OS=Arabidopsis thaliana GN=CYP83B1 PE=1 SV=1
SRS0990	COP10_ARATH	light	sp|Q9LJD7|COP10_ARATH Constitutive photomorphogenesis protein 10 OS=Arabidopsis thaliana GN=COP10 PE=1 SV=1
SRS1035	ACT7_ARATH	light	sp|P53492|ACT7_ARATH Actin-7 OS=Arabidopsis thaliana GN=ACT7 PE=1 SV=1
SRS1041	HD1_ORYSJ	light	sp|Q9FDX8|HD1_ORYSJ Zinc finger protein HD1 OS=Oryza sativa subsp. japonica GN=HD1 PE=2 SV=1
SRS1044	CSN4_ARATH	light	sp|Q8L5U0|CSN4_ARATH COP9 signalosome complex subunit 4 OS=Arabidopsis thaliana GN=CSN4 PE=1 SV=2
SRS1053	CML24_ARATH	light	sp|P25070|CML24_ARATH Calcium-binding protein CML24 OS=Arabidopsis thaliana GN=CML24 PE=2 SV=2
SRS1058	COP10_ARATH	light	sp|Q9LJD7|COP10_ARATH Constitutive photomorphogenesis protein 10 OS=Arabidopsis thaliana GN=COP10 PE=1 SV=1
SRS1098	GPA1_ORYSI	light	sp|A2Y3B5|GPA1_ORYSI Guanine nucleotide-binding protein alpha-1 subunit OS=Oryza sativa subsp. indica GN=GPA1 PE=2 SV=2
SRS1102	FTSH5_ARATH	light	sp|Q9FH02|FTSH5_ARATH ATP-dependent zinc metalloprotease FTSH 5, chloroplastic OS=Arabidopsis thaliana GN=FTSH5 PE=1 SV=1
SRS1106	COP10_ARATH	light	sp|Q9LJD7|COP10_ARATH Constitutive photomorphogenesis protein 10 OS=Arabidopsis thaliana GN=COP10 PE=1 SV=1
SRS1127	ACT7_ARATH	light	sp|P53492|ACT7_ARATH Actin-7 OS=Arabidopsis thaliana GN=ACT7 PE=1 SV=1
SRS1138	C71B2_ARATH	light	sp|O65788|C71B2_ARATH Cytochrome P450 71B2 OS=Arabidopsis thaliana GN=CYP71B2 PE=2 SV=2
SRS1167	CML24_ARATH	light	sp|P25070|CML24_ARATH Calcium-binding protein CML24 OS=Arabidopsis thaliana GN=CML24 PE=2 SV=2
SRS1186	COP10_ARATH	light	sp|Q9LJD7|COP10_ARATH Constitutive photomorphogenesis protein 10 OS=Arabidopsis thaliana GN=COP10 PE=1 SV=1
SRS1189	EF4L4_ARATH	light	sp|Q570U6|EF4L4_ARATH Protein ELF4-LIKE 4 OS=Arabidopsis thaliana GN=EFL4 PE=2 SV=1
SRS1207	TAF1B_ARATH	light	sp|Q6PUA2|TAF1B_ARATH Transcription initiation factor TFIID subunit 1-B OS=Arabidopsis thaliana GN=HAF2 PE=2 SV=1
SRS1249	HD1_ORYSJ	light	sp|Q9FDX8|HD1_ORYSJ Zinc finger protein HD1 OS=Oryza sativa subsp. japonica GN=HD1 PE=2 SV=1
SRS1262	PAT1_ARATH	light	sp|Q9LDL7|PAT1_ARATH Scarecrow-like transcription factor PAT1 OS=Arabidopsis thaliana GN=PAT1 PE=2 SV=1
SRS1264	COP10_ARATH	light	sp|Q9LJD7|COP10_ARATH Constitutive photomorphogenesis protein 10 OS=Arabidopsis thaliana GN=COP10 PE=1 SV=1
SRS1301	SPA3_ARATH	light	sp|Q9LJR3|SPA3_ARATH Protein SPA1-RELATED 3 OS=Arabidopsis thaliana GN=SPA3 PE=1 SV=1
SRS1306	C71B2_ARATH	light	sp|O65788|C71B2_ARATH Cytochrome P450 71B2 OS=Arabidopsis thaliana GN=CYP71B2 PE=2 SV=2
SRS1320	CYB5_ORYSJ	light	sp|P49100|CYB5_ORYSJ Cytochrome b5 OS=Oryza sativa subsp. japonica GN=Os05g0108800 PE=2 SV=2
SRS1321	CML24_ARATH	light	sp|P25070|CML24_ARATH Calcium-binding protein CML24 OS=Arabidopsis thaliana GN=CML24 PE=2 SV=2
SRS1332	BCB1_ARATH	light	sp|Q07488|BCB1_ARATH Blue copper protein OS=Arabidopsis thaliana GN=BCB PE=1 SV=2
SRS1336	CAH2_ARATH	light	sp|P42737|CAH2_ARATH Carbonic anhydrase 2, chloroplastic OS=Arabidopsis thaliana GN=CA2 PE=1 SV=2
SRS1342	PIF4_ARATH	light	sp|Q8W2F3|PIF4_ARATH Transcription factor PIF4 OS=Arabidopsis thaliana GN=PIF4 PE=1 SV=1
SRS1392	MKP1_ARATH	light	sp|Q9C5S1|MKP1_ARATH Protein-tyrosine-phosphatase MKP1 OS=Arabidopsis thaliana GN=MKP1 PE=1 SV=1
SRS1394	1A16_ARATH	light	sp|Q9SAR0|1A16_ARATH 1-aminocyclopropane-1-carboxylate synthase 6 OS=Arabidopsis thaliana GN=ACS6 PE=1 SV=2
SRS1406	WNK8_ARATH	light	sp|Q944Q0|WNK8_ARATH Serine/threonine-protein kinase WNK8 OS=Arabidopsis thaliana GN=WNK8 PE=1 SV=1
SRS1445	DOF37_ARATH	light	sp|Q43385|DOF37_ARATH Dof zinc finger protein DOF3.7 OS=Arabidopsis thaliana GN=DOF3.7 PE=1 SV=2
SRS1452	PAT1_ARATH	light	sp|Q9LDL7|PAT1_ARATH Scarecrow-like transcription factor PAT1 OS=Arabidopsis thaliana GN=PAT1 PE=2 SV=1
SRS1470	C71B2_ARATH	light	sp|O65788|C71B2_ARATH Cytochrome P450 71B2 OS=Arabidopsis thaliana GN=CYP71B2 PE=2 SV=2
SRS1489	PHOT2_ARATH	light	sp|P93025|PHOT2_ARATH Phototropin-2 OS=Arabidopsis thaliana GN=PHOT2 PE=1 SV=2
SRS1513	COP10_ARATH	light	sp|Q9LJD7|COP10_ARATH Constitutive photomorphogenesis protein 10 OS=Arabidopsis thaliana GN=COP10 PE=1 SV=1
SRS1605	KNAT4_ARATH	light	sp|P48001|KNAT4_ARATH Homeobox protein knotted-1-like 4 OS=Arabidopsis thaliana GN=KNAT4 PE=2 SV=3
SRS1620	CP18C_ARATH	light	sp|P34790|CP18C_ARATH Peptidyl-prolyl cis-trans isomerase CYP18-3 OS=Arabidopsis thaliana GN=CYP18-3 PE=1 SV=1
SRS1691	EID1_ARATH	light	sp|Q8LEA8|EID1_ARATH Phytochrome A-associated F-box protein OS=Arabidopsis thaliana GN=EID1 PE=1 SV=2
SRS1698	COP10_ARATH	light	sp|Q9LJD7|COP10_ARATH Constitutive photomorphogenesis protein 10 OS=Arabidopsis thaliana GN=COP10 PE=1 SV=1
SRS1713	BCB1_ARATH	light	sp|Q07488|BCB1_ARATH Blue copper protein OS=Arabidopsis thaliana GN=BCB PE=1 SV=2
SRS1720	CYB5_ORYSJ	light	sp|P49100|CYB5_ORYSJ Cytochrome b5 OS=Oryza sativa subsp. japonica GN=Os05g0108800 PE=2 SV=2
SRS1728	EID1_ARATH	light	sp|Q8LEA8|EID1_ARATH Phytochrome A-associated F-box protein OS=Arabidopsis thaliana GN=EID1 PE=1 SV=2
SRS1739	UCRIA_ARATH	light	sp|Q9ZR03|UCRIA_ARATH Cytochrome b6-f complex iron-sulfur subunit, chloroplastic OS=Arabidopsis thaliana GN=petC PE=1 SV=1
SRS1765	FTSH2_ARATH	light	sp|O80860|FTSH2_ARATH ATP-dependent zinc metalloprotease FTSH 2, chloroplastic OS=Arabidopsis thaliana GN=FTSH2 PE=1 SV=1
SRS1766	VATA_MAIZE	light	sp|P49087|VATA_MAIZE V-type proton ATPase catalytic subunit A (Fragment) OS=Zea mays PE=1 SV=1
SRS1786	COP10_ARATH	light	sp|Q9LJD7|COP10_ARATH Constitutive photomorphogenesis protein 10 OS=Arabidopsis thaliana GN=COP10 PE=1 SV=1
SRS1829	MD37F_ARATH	light	sp|Q39043|MD37F_ARATH Mediator of RNA polymerase II transcription subunit 37f OS=Arabidopsis thaliana GN=MED37F PE=1 SV=2
SRS1850	MYB4_ARATH	light	sp|Q9SZP1|MYB4_ARATH Transcription repressor MYB4 OS=Arabidopsis thaliana GN=MYB4 PE=1 SV=1
SRS1858	SIGE_ARATH	light	sp|Q9ZNX9|SIGE_ARATH RNA polymerase sigma factor sigE, chloroplastic/mitochondrial OS=Arabidopsis thaliana GN=SIGE PE=1 SV=1
SRS1878	MDHM1_ARATH	light	sp|Q9ZP06|MDHM1_ARATH Malate dehydrogenase 1, mitochondrial OS=Arabidopsis thaliana GN=At1g53240 PE=1 SV=1
SRS1892	CFI1_ARATH	light	sp|P41088|CFI1_ARATH Chalcone--flavonone isomerase 1 OS=Arabidopsis thaliana GN=CHI1 PE=1 SV=2
SRS1899	CSN1_ARATH	light	sp|P45432|CSN1_ARATH COP9 signalosome complex subunit 1 OS=Arabidopsis thaliana GN=CSN1 PE=1 SV=2
SRS1972	CUL4_ARATH	light	sp|Q8LGH4|CUL4_ARATH Cullin-4 OS=Arabidopsis thaliana GN=CUL4 PE=1 SV=1
SRS2000	CYB5_ORYSJ	light	sp|P49100|CYB5_ORYSJ Cytochrome b5 OS=Oryza sativa subsp. japonica GN=Os05g0108800 PE=2 SV=2
SRS2004	PHYA_ARATH	light	sp|P14712|PHYA_ARATH Phytochrome A OS=Arabidopsis thaliana GN=PHYA PE=1 SV=2
SRS2008	FNRL1_ARATH	light	sp|Q9FKW6|FNRL1_ARATH Ferredoxin--NADP reductase, leaf isozyme 1, chloroplastic OS=Arabidopsis thaliana GN=LFNR1 PE=1 SV=1
SRS2010	STR4_ARATH	light	sp|Q9M158|STR4_ARATH Rhodanese-like domain-containing protein 4, chloroplastic OS=Arabidopsis thaliana GN=STR4 PE=1 SV=2
SRS2027	TCMO_ARATH	light	sp|P92994|TCMO_ARATH Trans-cinnamate 4-monooxygenase OS=Arabidopsis thaliana GN=CYP73A5 PE=2 SV=1
SRS2030	PAT1_ARATH	light	sp|Q9LDL7|PAT1_ARATH Scarecrow-like transcription factor PAT1 OS=Arabidopsis thaliana GN=PAT1 PE=2 SV=1
SRS2087	CSN1_ARATH	light	sp|P45432|CSN1_ARATH COP9 signalosome complex subunit 1 OS=Arabidopsis thaliana GN=CSN1 PE=1 SV=2
SRS2093	SIR_MAIZE	light	sp|O23813|SIR_MAIZE Sulfite reductase [ferredoxin], chloroplastic OS=Zea mays GN=SIR PE=1 SV=1
SRS2098	GAT12_ARATH	light	sp|P69781|GAT12_ARATH GATA transcription factor 12 OS=Arabidopsis thaliana GN=GATA12 PE=2 SV=1
SRS2117	CML24_ARATH	light	sp|P25070|CML24_ARATH Calcium-binding protein CML24 OS=Arabidopsis thaliana GN=CML24 PE=2 SV=2
SRS2134	TAAC_ARATH	light	sp|Q9M024|TAAC_ARATH Thylakoid ADP,ATP carrier protein, chloroplastic OS=Arabidopsis thaliana GN=TAAC PE=1 SV=1
SRS2148	HD1_ORYSJ	light	sp|Q9FDX8|HD1_ORYSJ Zinc finger protein HD1 OS=Oryza sativa subsp. japonica GN=HD1 PE=2 SV=1
SRS2178	CB21_MAIZE	light	sp|P12329|CB21_MAIZE Chlorophyll a-b binding protein 1, chloroplastic OS=Zea mays GN=CAB1 PE=3 SV=1
SRS2192	CSN3_ARATH	light	sp|Q8W575|CSN3_ARATH COP9 signalosome complex subunit 3 OS=Arabidopsis thaliana GN=CSN3 PE=1 SV=2
SRS2234	FTSH5_ARATH	light	sp|Q9FH02|FTSH5_ARATH ATP-dependent zinc metalloprotease FTSH 5, chloroplastic OS=Arabidopsis thaliana GN=FTSH5 PE=1 SV=1
SRS2237	AFR_ARATH	light	sp|Q8LAW2|AFR_ARATH F-box protein AFR OS=Arabidopsis thaliana GN=AFR PE=1 SV=2
SRS2240	CRY1_ARATH	light	sp|Q43125|CRY1_ARATH Cryptochrome-1 OS=Arabidopsis thaliana GN=CRY1 PE=1 SV=2
SRS2242	FTSH2_ARATH	light	sp|O80860|FTSH2_ARATH ATP-dependent zinc metalloprotease FTSH 2, chloroplastic OS=Arabidopsis thaliana GN=FTSH2 PE=1 SV=1
SRS2278	MDHM1_ARATH	light	sp|Q9ZP06|MDHM1_ARATH Malate dehydrogenase 1, mitochondrial OS=Arabidopsis thaliana GN=At1g53240 PE=1 SV=1
SRS2279	FTSH2_ORYSJ	light	sp|Q655S1|FTSH2_ORYSJ ATP-dependent zinc metalloprotease FTSH 2, chloroplastic OS=Oryza sativa subsp. japonica GN=FTSH2 PE=2 SV=1
SRS2290	HY5_ARATH	light	sp|O24646|HY5_ARATH Transcription factor HY5 OS=Arabidopsis thaliana GN=HY5 PE=1 SV=1
SRS2330	NIA1_MAIZE	light	sp|P17571|NIA1_MAIZE Nitrate reductase [NADH] (Fragment) OS=Zea mays PE=1 SV=2
SRS2337	PHYA_ARATH	light	sp|P14712|PHYA_ARATH Phytochrome A OS=Arabidopsis thaliana GN=PHYA PE=1 SV=2
SRS2357	ARR4_ARATH	light	sp|O82798|ARR4_ARATH Two-component response regulator ARR4 OS=Arabidopsis thaliana GN=ARR4 PE=1 SV=1
SRS2376	ACT7_ARATH	light	sp|P53492|ACT7_ARATH Actin-7 OS=Arabidopsis thaliana GN=ACT7 PE=1 SV=1
SRS2378	GGAP1_ARATH	light	sp|Q8RWE8|GGAP1_ARATH GDP-L-galactose phosphorylase 1 OS=Arabidopsis thaliana GN=VTC2 PE=1 SV=1
SRS2407	CSN1_ARATH	light	sp|P45432|CSN1_ARATH COP9 signalosome complex subunit 1 OS=Arabidopsis thaliana GN=CSN1 PE=1 SV=2
SRS2427	COP10_ARATH	light	sp|Q9LJD7|COP10_ARATH Constitutive photomorphogenesis protein 10 OS=Arabidopsis thaliana GN=COP10 PE=1 SV=1
SRS2435	TCMO_ARATH	light	sp|P92994|TCMO_ARATH Trans-cinnamate 4-monooxygenase OS=Arabidopsis thaliana GN=CYP73A5 PE=2 SV=1
SRS2456	TAAC_ARATH	light	sp|Q9M024|TAAC_ARATH Thylakoid ADP,ATP carrier protein, chloroplastic OS=Arabidopsis thaliana GN=TAAC PE=1 SV=1
SRS2457	CAS_ARATH	light	sp|Q9FN48|CAS_ARATH Calcium sensing receptor, chloroplastic OS=Arabidopsis thaliana GN=CAS PE=1 SV=1
SRS2467	CP18C_ARATH	light	sp|P34790|CP18C_ARATH Peptidyl-prolyl cis-trans isomerase CYP18-3 OS=Arabidopsis thaliana GN=CYP18-3 PE=1 SV=1
SRS2470	GATA2_ARATH	light	sp|O49741|GATA2_ARATH GATA transcription factor 2 OS=Arabidopsis thaliana GN=GATA2 PE=2 SV=1
CO000156	PER47_ARATH	oxidative	sp|Q9SZB9|PER47_ARATH Peroxidase 47 OS=Arabidopsis thaliana GN=PER47 PE=2 SV=2
CO000406	SODM_PRUPE	oxidative	sp|Q9SM64|SODM_PRUPE Superoxide dismutase [Mn], mitochondrial OS=Prunus persica GN=SOD PE=2 SV=1
CO000636	SSDH_ARATH	oxidative	sp|Q9SAK4|SSDH_ARATH Succinate-semialdehyde dehydrogenase, mitochondrial OS=Arabidopsis thaliana GN=ALDH5F1 PE=1 SV=2
CO000355	MSRA4_ORYSJ	oxidative	sp|Q336R9|MSRA4_ORYSJ Peptide methionine sulfoxide reductase A4, chloroplastic OS=Oryza sativa subsp. japonica GN=MSRA4 PE=2 SV=2
CO000049	IFRH_ARATH	oxidative	sp|P52577|IFRH_ARATH Isoflavone reductase homolog P3 OS=Arabidopsis thaliana GN=At1g75280 PE=2 SV=1
CO000478	ATPBM_ARATH	oxidative	sp|P83483|ATPBM_ARATH ATP synthase subunit beta-1, mitochondrial OS=Arabidopsis thaliana GN=At5g08670 PE=1 SV=1
CO000047	TRXH5_ARATH	oxidative	sp|Q39241|TRXH5_ARATH Thioredoxin H5 OS=Arabidopsis thaliana GN=TRX5 PE=1 SV=1
CO000164	ALF_MAIZE	oxidative	sp|P08440|ALF_MAIZE Fructose-bisphosphate aldolase, cytoplasmic isozyme OS=Zea mays PE=1 SV=1
CO000618	SSDH_ARATH	oxidative	sp|Q9SAK4|SSDH_ARATH Succinate-semialdehyde dehydrogenase, mitochondrial OS=Arabidopsis thaliana GN=ALDH5F1 PE=1 SV=2
CO000041	BAS1B_ARATH	oxidative	sp|Q9C5R8|BAS1B_ARATH 2-Cys peroxiredoxin BAS1-like, chloroplastic OS=Arabidopsis thaliana GN=At5g06290 PE=2 SV=3
CO000055	TRXH5_ARATH	oxidative	sp|Q39241|TRXH5_ARATH Thioredoxin H5 OS=Arabidopsis thaliana GN=TRX5 PE=1 SV=1
CO000007	PER42_ARATH	oxidative	sp|Q9SB81|PER42_ARATH Peroxidase 42 OS=Arabidopsis thaliana GN=PER42 PE=1 SV=2
CO000506	OXO1_HORVU	oxidative	sp|P45850|OXO1_HORVU Oxalate oxidase 1 OS=Hordeum vulgare PE=1 SV=1
CO000265	G3PC3_MAIZE	oxidative	sp|Q43247|G3PC3_MAIZE Glyceraldehyde-3-phosphate dehydrogenase 3, cytosolic OS=Zea mays GN=GAPC3 PE=2 SV=1
CO000330	OXO1_HORVU	oxidative	sp|P45850|OXO1_HORVU Oxalate oxidase 1 OS=Hordeum vulgare PE=1 SV=1
CO000099	P1_ARATH	oxidative	sp|Q39172|P1_ARATH NADP-dependent alkenal double bond reductase P1 OS=Arabidopsis thaliana GN=P1 PE=1 SV=1
CO000204	PER15_IPOBA	oxidative	sp|Q9LEH3|PER15_IPOBA Peroxidase 15 OS=Ipomoea batatas GN=pod PE=1 SV=1
CO000035	THIK2_ARATH	oxidative	sp|Q56WD9|THIK2_ARATH 3-ketoacyl-CoA thiolase 2, peroxisomal OS=Arabidopsis thaliana GN=PED1 PE=1 SV=2
CO000392	PER21_ARATH	oxidative	sp|Q42580|PER21_ARATH Peroxidase 21 OS=Arabidopsis thaliana GN=PER21 PE=1 SV=1
CO000097	OXO1_HORVU	oxidative	sp|P45850|OXO1_HORVU Oxalate oxidase 1 OS=Hordeum vulgare PE=1 SV=1
CO000329	P2_ARATH	oxidative	sp|Q39173|P2_ARATH NADP-dependent alkenal double bond reductase P2 OS=Arabidopsis thaliana GN=P2 PE=2 SV=2
CO000255	ALF_MAIZE	oxidative	sp|P08440|ALF_MAIZE Fructose-bisphosphate aldolase, cytoplasmic isozyme OS=Zea mays PE=1 SV=1
CO000079	SUMO1_ARATH	oxidative	sp|P55852|SUMO1_ARATH Small ubiquitin-related modifier 1 OS=Arabidopsis thaliana GN=SUMO1 PE=1 SV=2
CO000213	PER57_ARATH	oxidative	sp|Q43729|PER57_ARATH Peroxidase 57 OS=Arabidopsis thaliana GN=PER57 PE=1 SV=1
CO000108	G3PC3_MAIZE	oxidative	sp|Q43247|G3PC3_MAIZE Glyceraldehyde-3-phosphate dehydrogenase 3, cytosolic OS=Zea mays GN=GAPC3 PE=2 SV=1
CO000609	PRX2E_ARATH	oxidative	sp|Q949U7|PRX2E_ARATH Peroxiredoxin-2E, chloroplastic OS=Arabidopsis thaliana GN=PRXIIE PE=1 SV=2
CO000551	BAM1_ARATH	oxidative	sp|Q9LIR6|BAM1_ARATH Beta-amylase 1, chloroplastic OS=Arabidopsis thaliana GN=BAM1 PE=1 SV=1
CO000092	G3PC3_MAIZE	oxidative	sp|Q43247|G3PC3_MAIZE Glyceraldehyde-3-phosphate dehydrogenase 3, cytosolic OS=Zea mays GN=GAPC3 PE=2 SV=1
CO000559	GLNA2_ARATH	oxidative	sp|Q43127|GLNA2_ARATH Glutamine synthetase, chloroplastic/mitochondrial OS=Arabidopsis thaliana GN=GLN2 PE=1 SV=1
CO000280	ACP4_ARATH	oxidative	sp|Q9SW21|ACP4_ARATH Acyl carrier protein 4, chloroplastic OS=Arabidopsis thaliana GN=ACP4 PE=1 SV=1
SRS0225	SUMO1_ARATH	oxidative	sp|P55852|SUMO1_ARATH Small ubiquitin-related modifier 1 OS=Arabidopsis thaliana GN=SUMO1 PE=1 SV=2
SRS0309	TRXM5_ORYSJ	oxidative	sp|Q9ZP20|TRXM5_ORYSJ Thioredoxin M5, chloroplastic OS=Oryza sativa subsp. japonica GN=TRXM PE=2 SV=1
SRS0382	G3PC3_MAIZE	oxidative	sp|Q43247|G3PC3_MAIZE Glyceraldehyde-3-phosphate dehydrogenase 3, cytosolic OS=Zea mays GN=GAPC3 PE=2 SV=1
SRS0540	TRXH1_ORYSJ	oxidative	sp|Q0D840|TRXH1_ORYSJ Thioredoxin H1 OS=Oryza sativa subsp. japonica GN=TRXH PE=1 SV=1
SRS0601	GSTF8_ARATH	oxidative	sp|Q96266|GSTF8_ARATH Glutathione S-transferase F8, chloroplastic OS=Arabidopsis thaliana GN=GSTF8 PE=2 SV=3
SRS0616	GLNA2_ARATH	oxidative	sp|Q43127|GLNA2_ARATH Glutamine synthetase, chloroplastic/mitochondrial OS=Arabidopsis thaliana GN=GLN2 PE=1 SV=1
SRS0730	PP239_ARATH	oxidative	sp|Q9LSQ2|PP239_ARATH Putative pentatricopeptide repeat-containing protein At3g16890, mitochondrial OS=Arabidopsis thaliana GN=PPR40 PE=3 SV=1
SRS0743	G3PC3_MAIZE	oxidative	sp|Q43247|G3PC3_MAIZE Glyceraldehyde-3-phosphate dehydrogenase 3, cytosolic OS=Zea mays GN=GAPC3 PE=2 SV=1
SRS0755	ATP5H_ARATH	oxidative	sp|Q9FT52|ATP5H_ARATH ATP synthase subunit d, mitochondrial OS=Arabidopsis thaliana GN=At3g52300 PE=1 SV=3
SRS0809	GGT1_ARATH	oxidative	sp|Q9LR30|GGT1_ARATH Glutamate--glyoxylate aminotransferase 1 OS=Arabidopsis thaliana GN=GGAT1 PE=1 SV=1
SRS0831	TRXH1_ORYSJ	oxidative	sp|Q0D840|TRXH1_ORYSJ Thioredoxin H1 OS=Oryza sativa subsp. japonica GN=TRXH PE=1 SV=1
SRS0853	BZP10_ARATH	oxidative	sp|O22763|BZP10_ARATH Basic leucine zipper 10 OS=Arabidopsis thaliana GN=BZIP10 PE=1 SV=2
SRS0902	NAC42_ARATH	oxidative	sp|Q9SK55|NAC42_ARATH Transcription factor JUNGBRUNNEN 1 OS=Arabidopsis thaliana GN=JUB1 PE=1 SV=1
SRS0908	GMPP1_ARATH	oxidative	sp|O22287|GMPP1_ARATH Mannose-1-phosphate guanylyltransferase 1 OS=Arabidopsis thaliana GN=CYT1 PE=1 SV=1
SRS0937	P1_ARATH	oxidative	sp|Q39172|P1_ARATH NADP-dependent alkenal double bond reductase P1 OS=Arabidopsis thaliana GN=P1 PE=1 SV=1
SRS0945	PDI22_ARATH	oxidative	sp|Q9MAU6|PDI22_ARATH Protein disulfide-isomerase like 2-2 OS=Arabidopsis thaliana GN=PDIL2-2 PE=2 SV=2
SRS0960	BAP2_ARATH	oxidative	sp|Q58FX0|BAP2_ARATH BON1-associated protein 2 OS=Arabidopsis thaliana GN=BAP2 PE=1 SV=1
SRS0961	THIK2_ARATH	oxidative	sp|Q56WD9|THIK2_ARATH 3-ketoacyl-CoA thiolase 2, peroxisomal OS=Arabidopsis thaliana GN=PED1 PE=1 SV=2
SRS0967	ZAT12_ARATH	oxidative	sp|Q42410|ZAT12_ARATH Zinc finger protein ZAT12 OS=Arabidopsis thaliana GN=ZAT12 PE=2 SV=1
SRS0986	PER2_ARAHY	oxidative	sp|P22196|PER2_ARAHY Cationic peroxidase 2 OS=Arachis hypogaea GN=PNC2 PE=2 SV=1
SRS1005	GRS17_ARATH	oxidative	sp|Q9ZPH2|GRS17_ARATH Monothiol glutaredoxin-S17 OS=Arabidopsis thaliana GN=GRXS17 PE=2 SV=1
SRS1024	SUMO1_ARATH	oxidative	sp|P55852|SUMO1_ARATH Small ubiquitin-related modifier 1 OS=Arabidopsis thaliana GN=SUMO1 PE=1 SV=2
SRS1072	THIK2_ARATH	oxidative	sp|Q56WD9|THIK2_ARATH 3-ketoacyl-CoA thiolase 2, peroxisomal OS=Arabidopsis thaliana GN=PED1 PE=1 SV=2
SRS1075	PDI22_ARATH	oxidative	sp|Q9MAU6|PDI22_ARATH Protein disulfide-isomerase like 2-2 OS=Arabidopsis thaliana GN=PDIL2-2 PE=2 SV=2
SRS1100	DUS1B_ARATH	oxidative	sp|Q9M8K7|DUS1B_ARATH Dual specificity protein phosphatase 1B OS=Arabidopsis thaliana GN=DSPTP1B PE=1 SV=1
SRS1185	PER10_ARATH	oxidative	sp|Q9FX85|PER10_ARATH Peroxidase 10 OS=Arabidopsis thaliana GN=PER10 PE=1 SV=1
SRS1204	NUDT1_ARATH	oxidative	sp|Q9CA40|NUDT1_ARATH Nudix hydrolase 1 OS=Arabidopsis thaliana GN=NUDT1 PE=1 SV=1
SRS1237	PPA26_ARATH	oxidative	sp|Q949Y3|PPA26_ARATH Bifunctional purple acid phosphatase 26 OS=Arabidopsis thaliana GN=PAP26 PE=1 SV=1
SRS1311	TRXB2_ARATH	oxidative	sp|Q39242|TRXB2_ARATH Thioredoxin reductase 2 OS=Arabidopsis thaliana GN=NTR2 PE=2 SV=2
SRS1337	BZP10_ARATH	oxidative	sp|O22763|BZP10_ARATH Basic leucine zipper 10 OS=Arabidopsis thaliana GN=BZIP10 PE=1 SV=2
SRS1343	GRS17_ARATH	oxidative	sp|Q9ZPH2|GRS17_ARATH Monothiol glutaredoxin-S17 OS=Arabidopsis thaliana GN=GRXS17 PE=2 SV=1
SRS1359	NQR_ARATH	oxidative	sp|Q9LK88|NQR_ARATH NADPH:quinone oxidoreductase OS=Arabidopsis thaliana GN=NQR PE=1 SV=1
SRS1376	GPX1_ARATH	oxidative	sp|P52032|GPX1_ARATH Phospholipid hydroperoxide glutathione peroxidase 1, chloroplastic OS=Arabidopsis thaliana GN=GPX1 PE=1 SV=2
SRS1393	TRXH1_ORYSJ	oxidative	sp|Q0D840|TRXH1_ORYSJ Thioredoxin H1 OS=Oryza sativa subsp. japonica GN=TRXH PE=1 SV=1
SRS1404	REHYA_ORYSJ	oxidative	sp|P0C5C9|REHYA_ORYSJ 1-Cys peroxiredoxin A OS=Oryza sativa subsp. japonica GN=Os07g0638300 PE=2 SV=1
SRS1446	PDX13_ARATH	oxidative	sp|Q8L940|PDX13_ARATH Pyridoxal biosynthesis protein PDX1.3 OS=Arabidopsis thaliana GN=PDX13 PE=1 SV=2
SRS1524	IFRH_ARATH	oxidative	sp|P52577|IFRH_ARATH Isoflavone reductase homolog P3 OS=Arabidopsis thaliana GN=At1g75280 PE=2 SV=1
SRS1607	RFS2_ARATH	oxidative	sp|Q94A08|RFS2_ARATH Probable galactinol--sucrose galactosyltransferase 2 OS=Arabidopsis thaliana GN=RFS2 PE=2 SV=2
SRS1610	ZAT12_ARATH	oxidative	sp|Q42410|ZAT12_ARATH Zinc finger protein ZAT12 OS=Arabidopsis thaliana GN=ZAT12 PE=2 SV=1
SRS1617	NDK2_ARATH	oxidative	sp|O64903|NDK2_ARATH Nucleoside diphosphate kinase II, chloroplastic OS=Arabidopsis thaliana GN=NDPK2 PE=1 SV=2
SRS1635	PTI12_ARATH	oxidative	sp|O49339|PTI12_ARATH PTI1-like tyrosine-protein kinase 2 OS=Arabidopsis thaliana GN=PTI12 PE=1 SV=1
SRS1696	APX3_ARATH	oxidative	sp|Q42564|APX3_ARATH L-ascorbate peroxidase 3, peroxisomal OS=Arabidopsis thaliana GN=APX3 PE=2 SV=1
SRS1723	THIK2_ARATH	oxidative	sp|Q56WD9|THIK2_ARATH 3-ketoacyl-CoA thiolase 2, peroxisomal OS=Arabidopsis thaliana GN=PED1 PE=1 SV=2
SRS1784	SODC4_MAIZE	oxidative	sp|P23345|SODC4_MAIZE Superoxide dismutase [Cu-Zn] 4A OS=Zea mays GN=SODCC.3 PE=2 SV=2
SRS1835	OXO1_HORVU	oxidative	sp|P45850|OXO1_HORVU Oxalate oxidase 1 OS=Hordeum vulgare PE=1 SV=1
SRS1838	BZP10_ARATH	oxidative	sp|O22763|BZP10_ARATH Basic leucine zipper 10 OS=Arabidopsis thaliana GN=BZIP10 PE=1 SV=2
SRS1900	GMPP1_ARATH	oxidative	sp|O22287|GMPP1_ARATH Mannose-1-phosphate guanylyltransferase 1 OS=Arabidopsis thaliana GN=CYT1 PE=1 SV=1
SRS1920	TRXM5_ORYSJ	oxidative	sp|Q9ZP20|TRXM5_ORYSJ Thioredoxin M5, chloroplastic OS=Oryza sativa subsp. japonica GN=TRXM PE=2 SV=1
SRS1958	PER10_ARATH	oxidative	sp|Q9FX85|PER10_ARATH Peroxidase 10 OS=Arabidopsis thaliana GN=PER10 PE=1 SV=1
SRS1968	SSDH_ARATH	oxidative	sp|Q9SAK4|SSDH_ARATH Succinate-semialdehyde dehydrogenase, mitochondrial OS=Arabidopsis thaliana GN=ALDH5F1 PE=1 SV=2
SRS2033	PP290_ARATH	oxidative	sp|Q9LEX5|PP290_ARATH Pentatricopeptide repeat-containing protein At3g60980, mitochondrial OS=Arabidopsis thaliana GN=At3g60980 PE=2 SV=1
SRS2077	ZAT12_ARATH	oxidative	sp|Q42410|ZAT12_ARATH Zinc finger protein ZAT12 OS=Arabidopsis thaliana GN=ZAT12 PE=2 SV=1
SRS2081	OXI1_ARATH	oxidative	sp|Q9LSF1|OXI1_ARATH Serine/threonine-protein kinase OXI1 OS=Arabidopsis thaliana GN=OXI1 PE=1 SV=1
SRS2086	PTI12_ARATH	oxidative	sp|O49339|PTI12_ARATH PTI1-like tyrosine-protein kinase 2 OS=Arabidopsis thaliana GN=PTI12 PE=1 SV=1
SRS2113	MSRB2_ARATH	oxidative	sp|Q9C5C8|MSRB2_ARATH Peptide methionine sulfoxide reductase B2, chloroplastic OS=Arabidopsis thaliana GN=MSRB2 PE=1 SV=1
SRS2129	ALF_MAIZE	oxidative	sp|P08440|ALF_MAIZE Fructose-bisphosphate aldolase, cytoplasmic isozyme OS=Zea mays PE=1 SV=1
SRS2138	G3PC3_MAIZE	oxidative	sp|Q43247|G3PC3_MAIZE Glyceraldehyde-3-phosphate dehydrogenase 3, cytosolic OS=Zea mays GN=GAPC3 PE=2 SV=1
SRS2139	CEBIP_ORYSJ	oxidative	sp|Q8H8C7|CEBIP_ORYSJ Chitin elicitor-binding protein OS=Oryza sativa subsp. japonica GN=CEBIP PE=1 SV=1
SRS2165	PER24_ARATH	oxidative	sp|Q9ZV04|PER24_ARATH Peroxidase 24 OS=Arabidopsis thaliana GN=PER24 PE=2 SV=1
SRS2175	R47BP_ARATH	oxidative	sp|Q8VXZ9|R47BP_ARATH Polyadenylate-binding protein RBP47B' OS=Arabidopsis thaliana GN=RBP47B' PE=2 SV=1
SRS2247	PER51_ARATH	oxidative	sp|Q9SZE7|PER51_ARATH Peroxidase 51 OS=Arabidopsis thaliana GN=PER51 PE=2 SV=1
SRS2248	PTI12_ARATH	oxidative	sp|O49339|PTI12_ARATH PTI1-like tyrosine-protein kinase 2 OS=Arabidopsis thaliana GN=PTI12 PE=1 SV=1
SRS2259	OXO1_HORVU	oxidative	sp|P45850|OXO1_HORVU Oxalate oxidase 1 OS=Hordeum vulgare PE=1 SV=1
SRS2338	R47BP_ARATH	oxidative	sp|Q8VXZ9|R47BP_ARATH Polyadenylate-binding protein RBP47B' OS=Arabidopsis thaliana GN=RBP47B' PE=2 SV=1
SRS2354	BZP10_ARATH	oxidative	sp|O22763|BZP10_ARATH Basic leucine zipper 10 OS=Arabidopsis thaliana GN=BZIP10 PE=1 SV=2
SRS2381	ANP1_ARATH	oxidative	sp|O22040|ANP1_ARATH Mitogen-activated protein kinase kinase kinase ANP1 OS=Arabidopsis thaliana GN=ANP1 PE=1 SV=2
SRS2392	GLNA2_ARATH	oxidative	sp|Q43127|GLNA2_ARATH Glutamine synthetase, chloroplastic/mitochondrial OS=Arabidopsis thaliana GN=GLN2 PE=1 SV=1
SRS2418	PDI22_ARATH	oxidative	sp|Q9MAU6|PDI22_ARATH Protein disulfide-isomerase like 2-2 OS=Arabidopsis thaliana GN=PDIL2-2 PE=2 SV=2
SRS2447	SSDH_ARATH	oxidative	sp|Q9SAK4|SSDH_ARATH Succinate-semialdehyde dehydrogenase, mitochondrial OS=Arabidopsis thaliana GN=ALDH5F1 PE=1 SV=2
SRS2452	CEBIP_ORYSJ	oxidative	sp|Q8H8C7|CEBIP_ORYSJ Chitin elicitor-binding protein OS=Oryza sativa subsp. japonica GN=CEBIP PE=1 SV=1
SRS2462	SODM_PRUPE	oxidative	sp|Q9SM64|SODM_PRUPE Superoxide dismutase [Mn], mitochondrial OS=Prunus persica GN=SOD PE=2 SV=1
SRS2476	PER2_ARAHY	oxidative	sp|P22196|PER2_ARAHY Cationic peroxidase 2 OS=Arachis hypogaea GN=PNC2 PE=2 SV=1
CO000275	G3OX1_ARATH	phytohormone	sp|Q39103|G3OX1_ARATH Gibberellin 3-beta-dioxygenase 1 OS=Arabidopsis thaliana GN=GA3OX1 PE=1 SV=2
CO000620	EIN2_ARATH	phytohormone	sp|Q9S814|EIN2_ARATH Ethylene-insensitive protein 2 OS=Arabidopsis thaliana GN=EIN2 PE=1 SV=1
CO000163	LGUL_SOLLC	phytohormone	sp|Q42891|LGUL_SOLLC Lactoylglutathione lyase OS=Solanum lycopersicum GN=GLX1 PE=2 SV=1
CO000388	TBA1_ORYSJ	phytohormone	sp|P28752|TBA1_ORYSJ Tubulin alpha-1 chain OS=Oryza sativa subsp. japonica GN=TUBA1 PE=1 SV=1
CO000524	STO_ARATH	phytohormone	sp|Q96288|STO_ARATH Salt tolerance protein OS=Arabidopsis thaliana GN=STO PE=1 SV=1
CO000638	PMA4_ARATH	phytohormone	sp|Q9SU58|PMA4_ARATH ATPase 4, plasma membrane-type OS=Arabidopsis thaliana GN=AHA4 PE=1 SV=2
CO000231	PIP21_ARATH	phytohormone	sp|P43286|PIP21_ARATH Aquaporin PIP2-1 OS=Arabidopsis thaliana GN=PIP2-1 PE=1 SV=1
CO000136	RHA2A_ARATH	phytohormone	sp|Q9ZT50|RHA2A_ARATH E3 ubiquitin-protein ligase RHA2A OS=Arabidopsis thaliana GN=RHA2A PE=1 SV=1
CO000463	XTH22_ARATH	phytohormone	sp|Q38857|XTH22_ARATH Xyloglucan endotransglucosylase/hydrolase protein 22 OS=Arabidopsis thaliana GN=XTH22 PE=1 SV=1
CO000112	GLNA2_ORYSJ	phytohormone	sp|P14655|GLNA2_ORYSJ Glutamine synthetase, chloroplastic OS=Oryza sativa subsp. japonica GN=GLN2 PE=1 SV=1
CO000626	G3OX1_ARATH	phytohormone	sp|Q39103|G3OX1_ARATH Gibberellin 3-beta-dioxygenase 1 OS=Arabidopsis thaliana GN=GA3OX1 PE=1 SV=2
CO000190	TBA1_ORYSJ	phytohormone	sp|P28752|TBA1_ORYSJ Tubulin alpha-1 chain OS=Oryza sativa subsp. japonica GN=TUBA1 PE=1 SV=1
CO000283	MDHC_ORYSJ	phytohormone	sp|Q7XDC8|MDHC_ORYSJ Malate dehydrogenase, cytoplasmic OS=Oryza sativa subsp. japonica GN=Os10g0478200 PE=1 SV=3
CO000428	GAOX1_ARATH	phytohormone	sp|Q39110|GAOX1_ARATH Gibberellin 20 oxidase 1 OS=Arabidopsis thaliana GN=GA20OX1 PE=2 SV=2
CO000458	P2C45_ORYSJ	phytohormone	sp|Q7XR06|P2C45_ORYSJ Probable protein phosphatase 2C 45 OS=Oryza sativa subsp. japonica GN=Os04g0659500 PE=2 SV=2
CO000418	XTH22_ARATH	phytohormone	sp|Q38857|XTH22_ARATH Xyloglucan endotransglucosylase/hydrolase protein 22 OS=Arabidopsis thaliana GN=XTH22 PE=1 SV=1
CO000327	TBA1_ORYSJ	phytohormone	sp|P28752|TBA1_ORYSJ Tubulin alpha-1 chain OS=Oryza sativa subsp. japonica GN=TUBA1 PE=1 SV=1
CO000634	P2C06_ORYSJ	phytohormone	sp|Q0JLP9|P2C06_ORYSJ Probable protein phosphatase 2C 6 OS=Oryza sativa subsp. japonica GN=Os01g0583100 PE=2 SV=1
CO000184	GAOX2_ARATH	phytohormone	sp|Q39111|GAOX2_ARATH Gibberellin 20 oxidase 2 OS=Arabidopsis thaliana GN=GA20OX2 PE=2 SV=1
CO000241	TBB2_ORYSJ	phytohormone	sp|Q8H7U1|TBB2_ORYSJ Tubulin beta-2 chain OS=Oryza sativa subsp. japonica GN=TUBB2 PE=2 SV=1
CO000331	TIP12_ARATH	phytohormone	sp|Q41963|TIP12_ARATH Aquaporin TIP1-2 OS=Arabidopsis thaliana GN=TIP1-2 PE=1 SV=2
CO000010	INO1_ORYSJ	phytohormone	sp|O64437|INO1_ORYSJ Inositol-3-phosphate synthase OS=Oryza sativa subsp. japonica GN=INO1 PE=2 SV=2
CO000098	G3OX1_ARATH	phytohormone	sp|Q39103|G3OX1_ARATH Gibberellin 3-beta-dioxygenase 1 OS=Arabidopsis thaliana GN=GA3OX1 PE=1 SV=2
CO000302	PIP21_ARATH	phytohormone	sp|P43286|PIP21_ARATH Aquaporin PIP2-1 OS=Arabidopsis thaliana GN=PIP2-1 PE=1 SV=1
CO000498	LGUL_SOLLC	phytohormone	sp|Q42891|LGUL_SOLLC Lactoylglutathione lyase OS=Solanum lycopersicum GN=GLX1 PE=2 SV=1
CO000344	RAG3E_ARATH	phytohormone	sp|Q9XI98|RAG3E_ARATH Ras-related protein RABG3e OS=Arabidopsis thaliana GN=RABG3E PE=2 SV=1
CO000535	EIN2_ARATH	phytohormone	sp|Q9S814|EIN2_ARATH Ethylene-insensitive protein 2 OS=Arabidopsis thaliana GN=EIN2 PE=1 SV=1
CO000203	IMT1_MESCR	phytohormone	sp|P45986|IMT1_MESCR Inositol 4-methyltransferase OS=Mesembryanthemum crystallinum GN=IMT1 PE=1 SV=1
CO000476	PSB6_ARATH	phytohormone	sp|Q8LD27|PSB6_ARATH Proteasome subunit beta type-6 OS=Arabidopsis thaliana GN=PBA1 PE=1 SV=2
CO000625	GPX4_CITSI	phytohormone	sp|Q06652|GPX4_CITSI Probable phospholipid hydroperoxide glutathione peroxidase OS=Citrus sinensis GN=CSA PE=1 SV=1
CO000317	PSB6_ARATH	phytohormone	sp|Q8LD27|PSB6_ARATH Proteasome subunit beta type-6 OS=Arabidopsis thaliana GN=PBA1 PE=1 SV=2
CO000254	DNJ15_ARATH	phytohormone	sp|Q9ZSY2|DNJ15_ARATH Chaperone protein dnaJ 15 OS=Arabidopsis thaliana GN=ATJ15 PE=1 SV=1
CO000059	CDPKW_ARATH	phytohormone	sp|Q6NLQ6|CDPKW_ARATH Calcium-dependent protein kinase 32 OS=Arabidopsis thaliana GN=CPK32 PE=1 SV=1
CO000171	RAP23_ARATH	phytohormone	sp|P42736|RAP23_ARATH Ethylene-responsive transcription factor RAP2-3 OS=Arabidopsis thaliana GN=RAP2-3 PE=1 SV=2
CO000339	TIP12_ARATH	phytohormone	sp|Q41963|TIP12_ARATH Aquaporin TIP1-2 OS=Arabidopsis thaliana GN=TIP1-2 PE=1 SV=2
CO000547	LGUL_SOLLC	phytohormone	sp|Q42891|LGUL_SOLLC Lactoylglutathione lyase OS=Solanum lycopersicum GN=GLX1 PE=2 SV=1
CO000122	G3OX1_ARATH	phytohormone	sp|Q39103|G3OX1_ARATH Gibberellin 3-beta-dioxygenase 1 OS=Arabidopsis thaliana GN=GA3OX1 PE=1 SV=2
CO000347	CBSX3_ARATH	phytohormone	sp|Q9LEV3|CBSX3_ARATH CBS domain-containing protein CBSX3, mitochondrial OS=Arabidopsis thaliana GN=CBSX3 PE=1 SV=1
CO000157	DHAR2_ARATH	phytohormone	sp|Q9FRL8|DHAR2_ARATH Glutathione S-transferase DHAR2 OS=Arabidopsis thaliana GN=DHAR2 PE=1 SV=1
SRS0097	BRI1_ARATH	phytohormone	sp|O22476|BRI1_ARATH Protein BRASSINOSTEROID INSENSITIVE 1 OS=Arabidopsis thaliana GN=BRI1 PE=1 SV=1
SRS0104	GRPA_MAIZE	phytohormone	sp|P10979|GRPA_MAIZE Glycine-rich RNA-binding, abscisic acid-inducible protein OS=Zea mays GN=RAB15 PE=1 SV=1
SRS0356	COI1_ARATH	phytohormone	sp|O04197|COI1_ARATH Coronatine-insensitive protein 1 OS=Arabidopsis thaliana GN=COI1 PE=1 SV=1
SRS0416	PIP21_ARATH	phytohormone	sp|P43286|PIP21_ARATH Aquaporin PIP2-1 OS=Arabidopsis thaliana GN=PIP2-1 PE=1 SV=1
SRS0426	ARFG_ARATH	phytohormone	sp|P93022|ARFG_ARATH Auxin response factor 7 OS=Arabidopsis thaliana GN=ARF7 PE=1 SV=2
SRS0564	RHA2A_ARATH	phytohormone	sp|Q9ZT50|RHA2A_ARATH E3 ubiquitin-protein ligase RHA2A OS=Arabidopsis thaliana GN=RHA2A PE=1 SV=1
SRS0572	SY121_ARATH	phytohormone	sp|Q9ZSD4|SY121_ARATH Syntaxin-121 OS=Arabidopsis thaliana GN=SYP121 PE=1 SV=1
SRS0593	TBB7_ORYSJ	phytohormone	sp|P37832|TBB7_ORYSJ Tubulin beta-7 chain OS=Oryza sativa subsp. japonica GN=TUBB7 PE=1 SV=2
SRS0597	GATLA_ARATH	phytohormone	sp|Q9LHD2|GATLA_ARATH Probable galacturonosyltransferase-like 10 OS=Arabidopsis thaliana GN=GATL10 PE=2 SV=1
SRS0617	GUN9_ORYSJ	phytohormone	sp|P0C1U4|GUN9_ORYSJ Endoglucanase 9 OS=Oryza sativa subsp. japonica GN=GLU1 PE=2 SV=1
SRS0648	CIPK3_ARATH	phytohormone	sp|Q2V452|CIPK3_ARATH CBL-interacting serine/threonine-protein kinase 3 OS=Arabidopsis thaliana GN=CIPK3 PE=1 SV=2
SRS0657	4CLL5_ARATH	phytohormone	sp|Q84P21|4CLL5_ARATH 4-coumarate--CoA ligase-like 5 OS=Arabidopsis thaliana GN=4CLL5 PE=1 SV=2
SRS0674	IMT1_MESCR	phytohormone	sp|P45986|IMT1_MESCR Inositol 4-methyltransferase OS=Mesembryanthemum crystallinum GN=IMT1 PE=1 SV=1
SRS0679	GAI_ARATH	phytohormone	sp|Q9LQT8|GAI_ARATH DELLA protein GAI OS=Arabidopsis thaliana GN=GAI PE=1 SV=1
SRS0719	IAA14_ARATH	phytohormone	sp|Q38832|IAA14_ARATH Auxin-responsive protein IAA14 OS=Arabidopsis thaliana GN=IAA14 PE=1 SV=2
SRS0765	ECP40_DAUCA	phytohormone	sp|Q07322|ECP40_DAUCA Embryogenic cell protein 40 OS=Daucus carota GN=ECP40 PE=1 SV=1
SRS0790	PEAMT_SPIOL	phytohormone	sp|Q9M571|PEAMT_SPIOL Phosphoethanolamine N-methyltransferase OS=Spinacia oleracea GN=PEAMT PE=1 SV=1
SRS0811	RAP1_ARATH	phytohormone	sp|Q39204|RAP1_ARATH Transcription factor MYC2 OS=Arabidopsis thaliana GN=RAP1 PE=1 SV=2
SRS0814	XTH22_ARATH	phytohormone	sp|Q38857|XTH22_ARATH Xyloglucan endotransglucosylase/hydrolase protein 22 OS=Arabidopsis thaliana GN=XTH22 PE=1 SV=1
SRS0815	MAOX_MESCR	phytohormone	sp|P37223|MAOX_MESCR NADP-dependent malic enzyme OS=Mesembryanthemum crystallinum GN=MOD1 PE=2 SV=1
SRS0820	LGUL_SOLLC	phytohormone	sp|Q42891|LGUL_SOLLC Lactoylglutathione lyase OS=Solanum lycopersicum GN=GLX1 PE=2 SV=1
SRS0866	RHA2A_ARATH	phytohormone	sp|Q9ZT50|RHA2A_ARATH E3 ubiquitin-protein ligase RHA2A OS=Arabidopsis thaliana GN=RHA2A PE=1 SV=1
SRS0877	RAG3E_ARATH	phytohormone	sp|Q9XI98|RAG3E_ARATH Ras-related protein RABG3e OS=Arabidopsis thaliana GN=RABG3E PE=2 SV=1
SRS0890	IAA14_ARATH	phytohormone	sp|Q38832|IAA14_ARATH Auxin-responsive protein IAA14 OS=Arabidopsis thaliana GN=IAA14 PE=1 SV=2
SRS0933	OS13_SOLCO	phytohormone	sp|P50701|OS13_SOLCO Osmotin-like protein OSML13 OS=Solanum commersonii PE=2 SV=1
SRS0980	TBA1_ORYSJ	phytohormone	sp|P28752|TBA1_ORYSJ Tubulin alpha-1 chain OS=Oryza sativa subsp. japonica GN=TUBA1 PE=1 SV=1
SRS1007	GTE10_ARATH	phytohormone	sp|Q9FGW9|GTE10_ARATH Transcription factor GTE10 OS=Arabidopsis thaliana GN=GTE10 PE=1 SV=2
SRS1029	GRPA_MAIZE	phytohormone	sp|P10979|GRPA_MAIZE Glycine-rich RNA-binding, abscisic acid-inducible protein OS=Zea mays GN=RAB15 PE=1 SV=1
SRS1120	NINJA_ARATH	phytohormone	sp|Q9SV55|NINJA_ARATH AFP homolog 2 OS=Arabidopsis thaliana GN=AFPH2 PE=1 SV=1
SRS1131	LTL1_ARATH	phytohormone	sp|Q9M8Y5|LTL1_ARATH GDSL esterase/lipase LTL1 OS=Arabidopsis thaliana GN=LTL1 PE=2 SV=1
SRS1134	RAG3E_ARATH	phytohormone	sp|Q9XI98|RAG3E_ARATH Ras-related protein RABG3e OS=Arabidopsis thaliana GN=RABG3E PE=2 SV=1
SRS1139	PRL1_ARATH	phytohormone	sp|Q42384|PRL1_ARATH Protein pleiotropic regulatory locus 1 OS=Arabidopsis thaliana GN=PRL1 PE=1 SV=1
SRS1148	TI10A_ARATH	phytohormone	sp|Q9LMA8|TI10A_ARATH Protein TIFY 10A OS=Arabidopsis thaliana GN=TIFY10A PE=1 SV=1
SRS1156	RHA2A_ARATH	phytohormone	sp|Q9ZT50|RHA2A_ARATH E3 ubiquitin-protein ligase RHA2A OS=Arabidopsis thaliana GN=RHA2A PE=1 SV=1
SRS1164	GATLA_ARATH	phytohormone	sp|Q9LHD2|GATLA_ARATH Probable galacturonosyltransferase-like 10 OS=Arabidopsis thaliana GN=GATL10 PE=2 SV=1
SRS1182	ODPA2_ARATH	phytohormone	sp|Q8H1Y0|ODPA2_ARATH Pyruvate dehydrogenase E1 component subunit alpha-2, mitochondrial OS=Arabidopsis thaliana GN=IAR4 PE=1 SV=2
SRS1184	GH31_ORYSJ	phytohormone	sp|Q8LQM5|GH31_ORYSJ Probable indole-3-acetic acid-amido synthetase GH3.1 OS=Oryza sativa subsp. japonica GN=GH3.1 PE=2 SV=1
SRS1188	LGUL_SOLLC	phytohormone	sp|Q42891|LGUL_SOLLC Lactoylglutathione lyase OS=Solanum lycopersicum GN=GLX1 PE=2 SV=1
SRS1191	GRPA_MAIZE	phytohormone	sp|P10979|GRPA_MAIZE Glycine-rich RNA-binding, abscisic acid-inducible protein OS=Zea mays GN=RAB15 PE=1 SV=1
SRS1199	RGL2_ARATH	phytohormone	sp|Q8GXW1|RGL2_ARATH DELLA protein RGL2 OS=Arabidopsis thaliana GN=RGL2 PE=1 SV=2
SRS1214	LGUL_SOLLC	phytohormone	sp|Q42891|LGUL_SOLLC Lactoylglutathione lyase OS=Solanum lycopersicum GN=GLX1 PE=2 SV=1
SRS1223	LGUL_SOLLC	phytohormone	sp|Q42891|LGUL_SOLLC Lactoylglutathione lyase OS=Solanum lycopersicum GN=GLX1 PE=2 SV=1
SRS1229	PMA4_ARATH	phytohormone	sp|Q9SU58|PMA4_ARATH ATPase 4, plasma membrane-type OS=Arabidopsis thaliana GN=AHA4 PE=1 SV=2
SRS1231	PMA4_ARATH	phytohormone	sp|Q9SU58|PMA4_ARATH ATPase 4, plasma membrane-type OS=Arabidopsis thaliana GN=AHA4 PE=1 SV=2
SRS1250	GLNA2_ORYSJ	phytohormone	sp|P14655|GLNA2_ORYSJ Glutamine synthetase, chloroplastic OS=Oryza sativa subsp. japonica GN=GLN2 PE=1 SV=1
SRS1251	PSB6_ARATH	phytohormone	sp|Q8LD27|PSB6_ARATH Proteasome subunit beta type-6 OS=Arabidopsis thaliana GN=PBA1 PE=1 SV=2
SRS1255	PRL1_ARATH	phytohormone	sp|Q42384|PRL1_ARATH Protein pleiotropic regulatory locus 1 OS=Arabidopsis thaliana GN=PRL1 PE=1 SV=1
SRS1290	DHAR2_ARATH	phytohormone	sp|Q9FRL8|DHAR2_ARATH Glutathione S-transferase DHAR2 OS=Arabidopsis thaliana GN=DHAR2 PE=1 SV=1
SRS1294	M2K2_ARATH	phytohormone	sp|Q9S7U9|M2K2_ARATH Mitogen-activated protein kinase kinase 2 OS=Arabidopsis thaliana GN=MKK2 PE=1 SV=2
SRS1314	SAPK1_ORYSJ	phytohormone	sp|Q75LR7|SAPK1_ORYSJ Serine/threonine-protein kinase SAPK1 OS=Oryza sativa subsp. japonica GN=SAPK1 PE=1 SV=1
SRS1340	AB19B_ARATH	phytohormone	sp|Q9LJX0|AB19B_ARATH ABC transporter B family member 19 OS=Arabidopsis thaliana GN=ABCB19 PE=1 SV=1
SRS1352	PRL1_ARATH	phytohormone	sp|Q42384|PRL1_ARATH Protein pleiotropic regulatory locus 1 OS=Arabidopsis thaliana GN=PRL1 PE=1 SV=1
SRS1370	LTL1_ARATH	phytohormone	sp|Q9M8Y5|LTL1_ARATH GDSL esterase/lipase LTL1 OS=Arabidopsis thaliana GN=LTL1 PE=2 SV=1
SRS1373	LTL1_ARATH	phytohormone	sp|Q9M8Y5|LTL1_ARATH GDSL esterase/lipase LTL1 OS=Arabidopsis thaliana GN=LTL1 PE=2 SV=1
SRS1389	AB19B_ARATH	phytohormone	sp|Q9LJX0|AB19B_ARATH ABC transporter B family member 19 OS=Arabidopsis thaliana GN=ABCB19 PE=1 SV=1
SRS1398	MYB44_ARATH	phytohormone	sp|Q9FDW1|MYB44_ARATH Transcription factor MYB44 OS=Arabidopsis thaliana GN=MYB44 PE=2 SV=1
SRS1402	IMT1_MESCR	phytohormone	sp|P45986|IMT1_MESCR Inositol 4-methyltransferase OS=Mesembryanthemum crystallinum GN=IMT1 PE=1 SV=1
SRS1437	ARIA_ARATH	phytohormone	sp|B9DHT4|ARIA_ARATH ARM REPEAT PROTEIN INTERACTING WITH ABF2 OS=Arabidopsis thaliana GN=ARIA PE=1 SV=2
SRS1451	SKP2B_ARATH	phytohormone	sp|O49286|SKP2B_ARATH F-box protein SKP2B OS=Arabidopsis thaliana GN=SKP2B PE=1 SV=1
SRS1455	GAOX1_ARATH	phytohormone	sp|Q39110|GAOX1_ARATH Gibberellin 20 oxidase 1 OS=Arabidopsis thaliana GN=GA20OX1 PE=2 SV=2
SRS1461	DPNP1_ARATH	phytohormone	sp|Q42546|DPNP1_ARATH SAL1 phosphatase OS=Arabidopsis thaliana GN=SAL1 PE=1 SV=1
SRS1501	DRE2D_ARATH	phytohormone	sp|Q9LQZ2|DRE2D_ARATH Dehydration-responsive element-binding protein 2D OS=Arabidopsis thaliana GN=DREB2D PE=2 SV=1
SRS1502	TIP11_ORYSJ	phytohormone	sp|P50156|TIP11_ORYSJ Probable aquaporin TIP1-1 OS=Oryza sativa subsp. japonica GN=TIP1-1 PE=2 SV=1
SRS1558	GATLA_ARATH	phytohormone	sp|Q9LHD2|GATLA_ARATH Probable galacturonosyltransferase-like 10 OS=Arabidopsis thaliana GN=GATL10 PE=2 SV=1
SRS1581	U74B1_ARATH	phytohormone	sp|O48676|U74B1_ARATH UDP-glycosyltransferase 74B1 OS=Arabidopsis thaliana GN=UGT74B1 PE=1 SV=1
SRS1590	PSB6_ARATH	phytohormone	sp|Q8LD27|PSB6_ARATH Proteasome subunit beta type-6 OS=Arabidopsis thaliana GN=PBA1 PE=1 SV=2
SRS1613	ODPA2_ARATH	phytohormone	sp|Q8H1Y0|ODPA2_ARATH Pyruvate dehydrogenase E1 component subunit alpha-2, mitochondrial OS=Arabidopsis thaliana GN=IAR4 PE=1 SV=2
SRS1615	EIN3_ARATH	phytohormone	sp|O24606|EIN3_ARATH Protein ETHYLENE INSENSITIVE 3 OS=Arabidopsis thaliana GN=EIN3 PE=1 SV=1
SRS1621	TBB2_ORYSJ	phytohormone	sp|Q8H7U1|TBB2_ORYSJ Tubulin beta-2 chain OS=Oryza sativa subsp. japonica GN=TUBB2 PE=2 SV=1
SRS1624	UGE1_ARATH	phytohormone	sp|Q42605|UGE1_ARATH Bifunctional UDP-glucose 4-epimerase and UDP-xylose 4-epimerase 1 OS=Arabidopsis thaliana GN=UGE1 PE=1 SV=2
SRS1633	PIP21_ARATH	phytohormone	sp|P43286|PIP21_ARATH Aquaporin PIP2-1 OS=Arabidopsis thaliana GN=PIP2-1 PE=1 SV=1
SRS1663	AMPL_SOLTU	phytohormone	sp|P31427|AMPL_SOLTU Leucine aminopeptidase, chloroplastic OS=Solanum tuberosum GN=LAP PE=2 SV=2
SRS1672	RAG3E_ARATH	phytohormone	sp|Q9XI98|RAG3E_ARATH Ras-related protein RABG3e OS=Arabidopsis thaliana GN=RABG3E PE=2 SV=1
SRS1678	GAOX1_ARATH	phytohormone	sp|Q39110|GAOX1_ARATH Gibberellin 20 oxidase 1 OS=Arabidopsis thaliana GN=GA20OX1 PE=2 SV=2
SRS1679	PSB4_ARATH	phytohormone	sp|Q7DLR9|PSB4_ARATH Proteasome subunit beta type-4 OS=Arabidopsis thaliana GN=PBG1 PE=1 SV=2
SRS1727	P2C10_ORYSJ	phytohormone	sp|Q67UX7|P2C10_ORYSJ Probable protein phosphatase 2C 10 OS=Oryza sativa subsp. japonica GN=Os02g0149800 PE=2 SV=1
SRS1733	P2C10_ORYSJ	phytohormone	sp|Q67UX7|P2C10_ORYSJ Probable protein phosphatase 2C 10 OS=Oryza sativa subsp. japonica GN=Os02g0149800 PE=2 SV=1
SRS1740	MAOX_MESCR	phytohormone	sp|P37223|MAOX_MESCR NADP-dependent malic enzyme OS=Mesembryanthemum crystallinum GN=MOD1 PE=2 SV=1
SRS1750	P2C45_ORYSJ	phytohormone	sp|Q7XR06|P2C45_ORYSJ Probable protein phosphatase 2C 45 OS=Oryza sativa subsp. japonica GN=Os04g0659500 PE=2 SV=2
SRS1755	P2C34_ARATH	phytohormone	sp|Q9M9W9|P2C34_ARATH Probable protein phosphatase 2C 34 OS=Arabidopsis thaliana GN=At3g05640 PE=2 SV=1
SRS1781	TGA2_ARATH	phytohormone	sp|P43273|TGA2_ARATH Transcription factor TGA2 OS=Arabidopsis thaliana GN=TGA2 PE=1 SV=1
SRS1797	GTE10_ARATH	phytohormone	sp|Q9FGW9|GTE10_ARATH Transcription factor GTE10 OS=Arabidopsis thaliana GN=GTE10 PE=1 SV=2
SRS1807	PRL1_ARATH	phytohormone	sp|Q42384|PRL1_ARATH Protein pleiotropic regulatory locus 1 OS=Arabidopsis thaliana GN=PRL1 PE=1 SV=1
SRS1821	ARFG_ARATH	phytohormone	sp|P93022|ARFG_ARATH Auxin response factor 7 OS=Arabidopsis thaliana GN=ARF7 PE=1 SV=2
SRS1823	GAOX2_ARATH	phytohormone	sp|Q39111|GAOX2_ARATH Gibberellin 20 oxidase 2 OS=Arabidopsis thaliana GN=GA20OX2 PE=2 SV=1
SRS1825	AXR4_ARATH	phytohormone	sp|Q9FZ33|AXR4_ARATH Protein AUXIN RESPONSE 4 OS=Arabidopsis thaliana GN=AXR4 PE=1 SV=1
SRS1830	MAOX_MESCR	phytohormone	sp|P37223|MAOX_MESCR NADP-dependent malic enzyme OS=Mesembryanthemum crystallinum GN=MOD1 PE=2 SV=1
SRS1859	TBB7_ORYSJ	phytohormone	sp|P37832|TBB7_ORYSJ Tubulin beta-7 chain OS=Oryza sativa subsp. japonica GN=TUBB7 PE=1 SV=2
SRS1897	MYB44_ARATH	phytohormone	sp|Q9FDW1|MYB44_ARATH Transcription factor MYB44 OS=Arabidopsis thaliana GN=MYB44 PE=2 SV=1
SRS1902	PP1_PHAVU	phytohormone	sp|P48490|PP1_PHAVU Serine/threonine-protein phosphatase PP1 OS=Phaseolus vulgaris PE=2 SV=1
SRS1908	RHA2A_ARATH	phytohormone	sp|Q9ZT50|RHA2A_ARATH E3 ubiquitin-protein ligase RHA2A OS=Arabidopsis thaliana GN=RHA2A PE=1 SV=1
SRS1926	EIN3_ARATH	phytohormone	sp|O24606|EIN3_ARATH Protein ETHYLENE INSENSITIVE 3 OS=Arabidopsis thaliana GN=EIN3 PE=1 SV=1
SRS1937	AB19B_ARATH	phytohormone	sp|Q9LJX0|AB19B_ARATH ABC transporter B family member 19 OS=Arabidopsis thaliana GN=ABCB19 PE=1 SV=1
SRS1951	IP5PD_ARATH	phytohormone	sp|Q9SYK4|IP5PD_ARATH Type I inositol 1,4,5-trisphosphate 5-phosphatase 13 OS=Arabidopsis thaliana GN=5PTASE13 PE=1 SV=1
SRS1961	RHA2A_ARATH	phytohormone	sp|Q9ZT50|RHA2A_ARATH E3 ubiquitin-protein ligase RHA2A OS=Arabidopsis thaliana GN=RHA2A PE=1 SV=1
SRS1970	TI10B_ARATH	phytohormone	sp|Q9S7M2|TI10B_ARATH Protein TIFY 10B OS=Arabidopsis thaliana GN=TIFY10B PE=1 SV=1
SRS1999	STO_ARATH	phytohormone	sp|Q96288|STO_ARATH Salt tolerance protein OS=Arabidopsis thaliana GN=STO PE=1 SV=1
SRS2005	GRPA_MAIZE	phytohormone	sp|P10979|GRPA_MAIZE Glycine-rich RNA-binding, abscisic acid-inducible protein OS=Zea mays GN=RAB15 PE=1 SV=1
SRS2007	IMT1_MESCR	phytohormone	sp|P45986|IMT1_MESCR Inositol 4-methyltransferase OS=Mesembryanthemum crystallinum GN=IMT1 PE=1 SV=1
SRS2021	PYL8_ARATH	phytohormone	sp|Q9FGM1|PYL8_ARATH Abscisic acid receptor PYL8 OS=Arabidopsis thaliana GN=PYL8 PE=1 SV=1
SRS2023	TGA2_ARATH	phytohormone	sp|P43273|TGA2_ARATH Transcription factor TGA2 OS=Arabidopsis thaliana GN=TGA2 PE=1 SV=1
SRS2034	PSB6_ARATH	phytohormone	sp|Q8LD27|PSB6_ARATH Proteasome subunit beta type-6 OS=Arabidopsis thaliana GN=PBA1 PE=1 SV=2
SRS2038	CIPK3_ARATH	phytohormone	sp|Q2V452|CIPK3_ARATH CBL-interacting serine/threonine-protein kinase 3 OS=Arabidopsis thaliana GN=CIPK3 PE=1 SV=2
SRS2047	PSB6_ARATH	phytohormone	sp|Q8LD27|PSB6_ARATH Proteasome subunit beta type-6 OS=Arabidopsis thaliana GN=PBA1 PE=1 SV=2
SRS2050	IMT1_MESCR	phytohormone	sp|P45986|IMT1_MESCR Inositol 4-methyltransferase OS=Mesembryanthemum crystallinum GN=IMT1 PE=1 SV=1
SRS2066	AUX1_ARATH	phytohormone	sp|Q96247|AUX1_ARATH Auxin transporter protein 1 OS=Arabidopsis thaliana GN=AUX1 PE=1 SV=1
SRS2068	PMA4_ARATH	phytohormone	sp|Q9SU58|PMA4_ARATH ATPase 4, plasma membrane-type OS=Arabidopsis thaliana GN=AHA4 PE=1 SV=2
SRS2076	UGE1_ARATH	phytohormone	sp|Q42605|UGE1_ARATH Bifunctional UDP-glucose 4-epimerase and UDP-xylose 4-epimerase 1 OS=Arabidopsis thaliana GN=UGE1 PE=1 SV=2
SRS2111	XTH22_ARATH	phytohormone	sp|Q38857|XTH22_ARATH Xyloglucan endotransglucosylase/hydrolase protein 22 OS=Arabidopsis thaliana GN=XTH22 PE=1 SV=1
SRS2123	TBB2_ORYSJ	phytohormone	sp|Q8H7U1|TBB2_ORYSJ Tubulin beta-2 chain OS=Oryza sativa subsp. japonica GN=TUBB2 PE=2 SV=1
SRS2130	SRK2I_ARATH	phytohormone	sp|Q39193|SRK2I_ARATH Serine/threonine-protein kinase SRK2I OS=Arabidopsis thaliana GN=SRK2I PE=1 SV=1
SRS2147	BPM2_ARATH	phytohormone	sp|Q9M8J9|BPM2_ARATH BTB/POZ and MATH domain-containing protein 2 OS=Arabidopsis thaliana GN=BPM2 PE=1 SV=1
SRS2152	UGE1_ARATH	phytohormone	sp|Q42605|UGE1_ARATH Bifunctional UDP-glucose 4-epimerase and UDP-xylose 4-epimerase 1 OS=Arabidopsis thaliana GN=UGE1 PE=1 SV=2
SRS2166	CIPKB_ARATH	phytohormone	sp|O22932|CIPKB_ARATH CBL-interacting serine/threonine-protein kinase 11 OS=Arabidopsis thaliana GN=CIPK11 PE=1 SV=1
SRS2187	CIPKB_ARATH	phytohormone	sp|O22932|CIPKB_ARATH CBL-interacting serine/threonine-protein kinase 11 OS=Arabidopsis thaliana GN=CIPK11 PE=1 SV=1
SRS2210	PLET1_ARATH	phytohormone	sp|Q5YGP8|PLET1_ARATH AP2-like ethylene-responsive transcription factor PLT1 OS=Arabidopsis thaliana GN=PLT1 PE=2 SV=1
SRS2222	GAI_ARATH	phytohormone	sp|Q9LQT8|GAI_ARATH DELLA protein GAI OS=Arabidopsis thaliana GN=GAI PE=1 SV=1
SRS2229	GUN9_ORYSJ	phytohormone	sp|P0C1U4|GUN9_ORYSJ Endoglucanase 9 OS=Oryza sativa subsp. japonica GN=GLU1 PE=2 SV=1
SRS2231	BGL18_ARATH	phytohormone	sp|Q9SE50|BGL18_ARATH Beta-D-glucopyranosyl abscisate beta-glucosidase OS=Arabidopsis thaliana GN=BGLU18 PE=1 SV=2
SRS2232	GPX4_CITSI	phytohormone	sp|Q06652|GPX4_CITSI Probable phospholipid hydroperoxide glutathione peroxidase OS=Citrus sinensis GN=CSA PE=1 SV=1
SRS2239	TIR1_ARATH	phytohormone	sp|Q570C0|TIR1_ARATH Protein TRANSPORT INHIBITOR RESPONSE 1 OS=Arabidopsis thaliana GN=TIR1 PE=1 SV=2
SRS2298	4CLL5_ARATH	phytohormone	sp|Q84P21|4CLL5_ARATH 4-coumarate--CoA ligase-like 5 OS=Arabidopsis thaliana GN=4CLL5 PE=1 SV=2
SRS2306	AB19B_ARATH	phytohormone	sp|Q9LJX0|AB19B_ARATH ABC transporter B family member 19 OS=Arabidopsis thaliana GN=ABCB19 PE=1 SV=1
SRS2316	BGL18_ARATH	phytohormone	sp|Q9SE50|BGL18_ARATH Beta-D-glucopyranosyl abscisate beta-glucosidase OS=Arabidopsis thaliana GN=BGLU18 PE=1 SV=2
SRS2361	CIPKB_ARATH	phytohormone	sp|O22932|CIPKB_ARATH CBL-interacting serine/threonine-protein kinase 11 OS=Arabidopsis thaliana GN=CIPK11 PE=1 SV=1
SRS2379	GRH1_ARATH	phytohormone	sp|Q9ZR12|GRH1_ARATH GRR1-like protein 1 OS=Arabidopsis thaliana GN=GRH1 PE=1 SV=1
SRS2383	PP1_PHAVU	phytohormone	sp|P48490|PP1_PHAVU Serine/threonine-protein phosphatase PP1 OS=Phaseolus vulgaris PE=2 SV=1
SRS2388	AUX1_ARATH	phytohormone	sp|Q96247|AUX1_ARATH Auxin transporter protein 1 OS=Arabidopsis thaliana GN=AUX1 PE=1 SV=1
SRS2413	METE_ARATH	phytohormone	sp|O50008|METE_ARATH 5-methyltetrahydropteroyltriglutamate--homocysteine methyltransferase OS=Arabidopsis thaliana GN=CIMS PE=1 SV=1
SRS2421	CIPKO_ARATH	phytohormone	sp|Q9LDI3|CIPKO_ARATH CBL-interacting serine/threonine-protein kinase 24 OS=Arabidopsis thaliana GN=CIPK24 PE=1 SV=1
SRS2423	IAA14_ARATH	phytohormone	sp|Q38832|IAA14_ARATH Auxin-responsive protein IAA14 OS=Arabidopsis thaliana GN=IAA14 PE=1 SV=2
SRS2431	G3OX1_ARATH	phytohormone	sp|Q39103|G3OX1_ARATH Gibberellin 3-beta-dioxygenase 1 OS=Arabidopsis thaliana GN=GA3OX1 PE=1 SV=2
SRS2432	G3OX1_ARATH	phytohormone	sp|Q39103|G3OX1_ARATH Gibberellin 3-beta-dioxygenase 1 OS=Arabidopsis thaliana GN=GA3OX1 PE=1 SV=2
SRS2434	PEAMT_SPIOL	phytohormone	sp|Q9M571|PEAMT_SPIOL Phosphoethanolamine N-methyltransferase OS=Spinacia oleracea GN=PEAMT PE=1 SV=1
SRS2436	PMA4_ARATH	phytohormone	sp|Q9SU58|PMA4_ARATH ATPase 4, plasma membrane-type OS=Arabidopsis thaliana GN=AHA4 PE=1 SV=2
SRS2482	METE_ARATH	phytohormone	sp|O50008|METE_ARATH 5-methyltetrahydropteroyltriglutamate--homocysteine methyltransferase OS=Arabidopsis thaliana GN=CIMS PE=1 SV=1
SRS2497	METE_ARATH	phytohormone	sp|O50008|METE_ARATH 5-methyltetrahydropteroyltriglutamate--homocysteine methyltransferase OS=Arabidopsis thaliana GN=CIMS PE=1 SV=1
CO000451	CYSPL_SOLLC	temperature	sp|P20721|CYSPL_SOLLC Low-temperature-induced cysteine proteinase (Fragment) OS=Solanum lycopersicum PE=2 SV=1
CO000341	14333_ARATH	temperature	sp|P42644|14333_ARATH 14-3-3-like protein GF14 psi OS=Arabidopsis thaliana GN=GRF3 PE=1 SV=2
CO000433	14333_ARATH	temperature	sp|P42644|14333_ARATH 14-3-3-like protein GF14 psi OS=Arabidopsis thaliana GN=GRF3 PE=1 SV=2
CO000434	14333_ARATH	temperature	sp|P42644|14333_ARATH 14-3-3-like protein GF14 psi OS=Arabidopsis thaliana GN=GRF3 PE=1 SV=2
CO000118	DNJH_CUCSA	temperature	sp|Q04960|DNJH_CUCSA DnaJ protein homolog OS=Cucumis sativus GN=DNAJ1 PE=2 SV=1
CO000219	CH10_ARATH	temperature	sp|P34893|CH10_ARATH 10 kDa chaperonin OS=Arabidopsis thaliana GN=CPN10 PE=3 SV=1
CO000070	FKB15_VICFA	temperature	sp|Q41649|FKB15_VICFA FK506-binding protein 2 OS=Vicia faba GN=FKBP15 PE=1 SV=1
CO000446	14336_ARATH	temperature	sp|P48349|14336_ARATH 14-3-3-like protein GF14 lambda OS=Arabidopsis thaliana GN=GRF6 PE=1 SV=1
CO000340	MD37E_ARATH	temperature	sp|P22953|MD37E_ARATH Probable mediator of RNA polymerase II transcription subunit 37e OS=Arabidopsis thaliana GN=MED37E PE=1 SV=3
CO000281	CSP3_ARATH	temperature	sp|Q94C69|CSP3_ARATH Cold shock domain-containing protein 3 OS=Arabidopsis thaliana GN=CSP3 PE=2 SV=1
CO000572	ENPL_CATRO	temperature	sp|P35016|ENPL_CATRO Endoplasmin homolog OS=Catharanthus roseus GN=HSP90 PE=1 SV=1
CO000422	HIBC1_ARATH	temperature	sp|Q9LKJ1|HIBC1_ARATH 3-hydroxyisobutyryl-CoA hydrolase 1 OS=Arabidopsis thaliana GN=CHY1 PE=1 SV=1
CO000096	HS17A_ARATH	temperature	sp|Q9XIE3|HS17A_ARATH 17.6 kDa class I heat shock protein 1 OS=Arabidopsis thaliana GN=HSP17.6A PE=1 SV=1
CO000174	HS903_ARATH	temperature	sp|P51818|HS903_ARATH Heat shock protein 90-3 OS=Arabidopsis thaliana GN=HSP90-3 PE=1 SV=2
CO000185	RAA5C_ARATH	temperature	sp|P28187|RAA5C_ARATH Ras-related protein RABA5c OS=Arabidopsis thaliana GN=RABA5C PE=1 SV=1
CO000305	RAA5C_ARATH	temperature	sp|P28187|RAA5C_ARATH Ras-related protein RABA5c OS=Arabidopsis thaliana GN=RABA5C PE=1 SV=1
CO000182	HS176_ARATH	temperature	sp|P29830|HS176_ARATH 17.6 kDa class II heat shock protein OS=Arabidopsis thaliana GN=HSP17.6 PE=2 SV=1
CO000604	GRP_HORVU	temperature	sp|Q43472|GRP_HORVU Glycine-rich RNA-binding protein blt801 OS=Hordeum vulgare GN=blt801 PE=1 SV=1
CO000619	HS23M_ARATH	temperature	sp|Q96331|HS23M_ARATH 23.6 kDa heat shock protein, mitochondrial OS=Arabidopsis thaliana GN=HSP23.6 PE=2 SV=1
CO000116	MD37C_ARATH	temperature	sp|Q9LHA8|MD37C_ARATH Probable mediator of RNA polymerase II transcription subunit 37c OS=Arabidopsis thaliana GN=MED37C PE=1 SV=1
CO000021	CH10C_ARATH	temperature	sp|O65282|CH10C_ARATH 20 kDa chaperonin, chloroplastic OS=Arabidopsis thaliana GN=CPN21 PE=1 SV=2
CO000568	HSP80_SOLLC	temperature	sp|P36181|HSP80_SOLLC Heat shock cognate protein 80 OS=Solanum lycopersicum GN=HSC80 PE=2 SV=1
CO000605	HSP7P_ARATH	temperature	sp|F4HQD4|HSP7P_ARATH Heat shock 70 kDa protein 15 OS=Arabidopsis thaliana GN=HSP70-15 PE=2 SV=1
CO000104	ENO2_ARATH	temperature	sp|P25696|ENO2_ARATH Bifunctional enolase 2/transcriptional activator OS=Arabidopsis thaliana GN=ENO2 PE=1 SV=1
CO000043	GRP_HORVU	temperature	sp|Q43472|GRP_HORVU Glycine-rich RNA-binding protein blt801 OS=Hordeum vulgare GN=blt801 PE=1 SV=1
CO000111	RAA5C_ARATH	temperature	sp|P28187|RAA5C_ARATH Ras-related protein RABA5c OS=Arabidopsis thaliana GN=RABA5C PE=1 SV=1
CO000199	HSP80_SOLLC	temperature	sp|P36181|HSP80_SOLLC Heat shock cognate protein 80 OS=Solanum lycopersicum GN=HSC80 PE=2 SV=1
CO000396	HFB4B_ORYSJ	temperature	sp|Q7XHZ0|HFB4B_ORYSJ Heat stress transcription factor B-4b OS=Oryza sativa subsp. japonica GN=HSFB4B PE=2 SV=1
CO000143	14336_ARATH	temperature	sp|P48349|14336_ARATH 14-3-3-like protein GF14 lambda OS=Arabidopsis thaliana GN=GRF6 PE=1 SV=1
CO000279	HS17A_ARATH	temperature	sp|Q9XIE3|HS17A_ARATH 17.6 kDa class I heat shock protein 1 OS=Arabidopsis thaliana GN=HSP17.6A PE=1 SV=1
CO000526	GSTUQ_ARATH	temperature	sp|Q9SHH8|GSTUQ_ARATH Glutathione S-transferase U26 OS=Arabidopsis thaliana GN=GSTU26 PE=2 SV=1
CO000131	HS17A_ARATH	temperature	sp|Q9XIE3|HS17A_ARATH 17.6 kDa class I heat shock protein 1 OS=Arabidopsis thaliana GN=HSP17.6A PE=1 SV=1
SRS0201	HS16A_ORYSJ	temperature	sp|P27777|HS16A_ORYSJ 16.9 kDa class I heat shock protein 1 OS=Oryza sativa subsp. japonica GN=HSP16.9A PE=1 SV=1
SRS0321	RAA5C_ARATH	temperature	sp|P28187|RAA5C_ARATH Ras-related protein RABA5c OS=Arabidopsis thaliana GN=RABA5C PE=1 SV=1
SRS0389	CYSPL_SOLLC	temperature	sp|P20721|CYSPL_SOLLC Low-temperature-induced cysteine proteinase (Fragment) OS=Solanum lycopersicum PE=2 SV=1
SRS0436	FKB65_ARATH	temperature	sp|Q9FJL3|FKB65_ARATH Peptidyl-prolyl cis-trans isomerase FKBP65 OS=Arabidopsis thaliana GN=FKBP65 PE=1 SV=1
SRS0498	MD37C_ARATH	temperature	sp|Q9LHA8|MD37C_ARATH Probable mediator of RNA polymerase II transcription subunit 37c OS=Arabidopsis thaliana GN=MED37C PE=1 SV=1
SRS0523	MD37E_ARATH	temperature	sp|P22953|MD37E_ARATH Probable mediator of RNA polymerase II transcription subunit 37e OS=Arabidopsis thaliana GN=MED37E PE=1 SV=3
SRS0529	GCN5_ARATH	temperature	sp|Q9AR19|GCN5_ARATH Histone acetyltransferase GCN5 OS=Arabidopsis thaliana GN=HAG1 PE=1 SV=1
SRS0550	GSTUQ_ARATH	temperature	sp|Q9SHH8|GSTUQ_ARATH Glutathione S-transferase U26 OS=Arabidopsis thaliana GN=GSTU26 PE=2 SV=1
SRS0615	GRP_HORVU	temperature	sp|Q43472|GRP_HORVU Glycine-rich RNA-binding protein blt801 OS=Hordeum vulgare GN=blt801 PE=1 SV=1
SRS0636	CH60A_ARATH	temperature	sp|P29197|CH60A_ARATH Chaperonin CPN60, mitochondrial OS=Arabidopsis thaliana GN=CPN60 PE=1 SV=2
SRS0658	BON1_ARATH	temperature	sp|Q941L3|BON1_ARATH Protein BONZAI 1 OS=Arabidopsis thaliana GN=BON1 PE=1 SV=2
SRS0668	RAA5C_ARATH	temperature	sp|P28187|RAA5C_ARATH Ras-related protein RABA5c OS=Arabidopsis thaliana GN=RABA5C PE=1 SV=1
SRS0680	RAA5C_ARATH	temperature	sp|P28187|RAA5C_ARATH Ras-related protein RABA5c OS=Arabidopsis thaliana GN=RABA5C PE=1 SV=1
SRS0682	CLPB3_ARATH	temperature	sp|Q9LF37|CLPB3_ARATH Chaperone protein ClpB3, chloroplastic OS=Arabidopsis thaliana GN=CLPB3 PE=2 SV=1
SRS0684	HS17A_ARATH	temperature	sp|Q9XIE3|HS17A_ARATH 17.6 kDa class I heat shock protein 1 OS=Arabidopsis thaliana GN=HSP17.6A PE=1 SV=1
SRS0693	CLPB1_ARATH	temperature	sp|P42730|CLPB1_ARATH Chaperone protein ClpB1 OS=Arabidopsis thaliana GN=CLPB1 PE=1 SV=2
SRS0787	DNJH_CUCSA	temperature	sp|Q04960|DNJH_CUCSA DnaJ protein homolog OS=Cucumis sativus GN=DNAJ1 PE=2 SV=1
SRS0800	RAA5C_ARATH	temperature	sp|P28187|RAA5C_ARATH Ras-related protein RABA5c OS=Arabidopsis thaliana GN=RABA5C PE=1 SV=1
SRS0819	RAA5C_ARATH	temperature	sp|P28187|RAA5C_ARATH Ras-related protein RABA5c OS=Arabidopsis thaliana GN=RABA5C PE=1 SV=1
SRS0856	HS901_ARATH	temperature	sp|P27323|HS901_ARATH Heat shock protein 90-1 OS=Arabidopsis thaliana GN=HSP90-1 PE=1 SV=3
SRS0868	GSTUQ_ARATH	temperature	sp|Q9SHH8|GSTUQ_ARATH Glutathione S-transferase U26 OS=Arabidopsis thaliana GN=GSTU26 PE=2 SV=1
SRS0949	BAG7_ARATH	temperature	sp|Q9LVA0|BAG7_ARATH BAG family molecular chaperone regulator 7 OS=Arabidopsis thaliana GN=BAG7 PE=1 SV=1
SRS0958	HS23M_ARATH	temperature	sp|Q96331|HS23M_ARATH 23.6 kDa heat shock protein, mitochondrial OS=Arabidopsis thaliana GN=HSP23.6 PE=2 SV=1
SRS0996	RAA5C_ARATH	temperature	sp|P28187|RAA5C_ARATH Ras-related protein RABA5c OS=Arabidopsis thaliana GN=RABA5C PE=1 SV=1
SRS1016	FKB62_ARATH	temperature	sp|Q38931|FKB62_ARATH Peptidyl-prolyl cis-trans isomerase FKBP62 OS=Arabidopsis thaliana GN=FKBP62 PE=1 SV=2
SRS1045	SCRM2_ARATH	temperature	sp|Q9LPW3|SCRM2_ARATH Transcription factor SCREAM2 OS=Arabidopsis thaliana GN=SCRM2 PE=1 SV=1
SRS1071	HS176_ARATH	temperature	sp|P29830|HS176_ARATH 17.6 kDa class II heat shock protein OS=Arabidopsis thaliana GN=HSP17.6 PE=2 SV=1
SRS1203	RAA5C_ARATH	temperature	sp|P28187|RAA5C_ARATH Ras-related protein RABA5c OS=Arabidopsis thaliana GN=RABA5C PE=1 SV=1
SRS1212	SGT1A_ARATH	temperature	sp|Q9SUR9|SGT1A_ARATH Protein SGT1 homolog A OS=Arabidopsis thaliana GN=SGT1A PE=1 SV=1
SRS1260	MD37C_ARATH	temperature	sp|Q9LHA8|MD37C_ARATH Probable mediator of RNA polymerase II transcription subunit 37c OS=Arabidopsis thaliana GN=MED37C PE=1 SV=1
SRS1275	GRP_HORVU	temperature	sp|Q43472|GRP_HORVU Glycine-rich RNA-binding protein blt801 OS=Hordeum vulgare GN=blt801 PE=1 SV=1
SRS1300	STIP_SOYBN	temperature	sp|Q43468|STIP_SOYBN Heat shock protein STI OS=Glycine max GN=STI PE=1 SV=1
SRS1354	14333_ARATH	temperature	sp|P42644|14333_ARATH 14-3-3-like protein GF14 psi OS=Arabidopsis thaliana GN=GRF3 PE=1 SV=2
SRS1365	BAG4_ARATH	temperature	sp|Q8RX71|BAG4_ARATH BAG family molecular chaperone regulator 4 OS=Arabidopsis thaliana GN=BAG4 PE=1 SV=1
SRS1401	CH62_CUCMA	temperature	sp|Q05046|CH62_CUCMA Chaperonin CPN60-2, mitochondrial OS=Cucurbita maxima GN=CPN60-2 PE=1 SV=1
SRS1413	RAA5C_ARATH	temperature	sp|P28187|RAA5C_ARATH Ras-related protein RABA5c OS=Arabidopsis thaliana GN=RABA5C PE=1 SV=1
SRS1457	TPP2_ORYSJ	temperature	sp|Q9FWQ2|TPP2_ORYSJ Probable trehalose-phosphate phosphatase 2 OS=Oryza sativa subsp. japonica GN=TPP2 PE=1 SV=1
SRS1497	FKB15_VICFA	temperature	sp|Q41649|FKB15_VICFA FK506-binding protein 2 OS=Vicia faba GN=FKBP15 PE=1 SV=1
SRS1504	BAG6_ARATH	temperature	sp|O82345|BAG6_ARATH BAG family molecular chaperone regulator 6 OS=Arabidopsis thaliana GN=BAG6 PE=1 SV=1
SRS1518	HSP7E_ARATH	temperature	sp|Q9S9N1|HSP7E_ARATH Heat shock 70 kDa protein 5 OS=Arabidopsis thaliana GN=HSP70-5 PE=2 SV=1
SRS1527	HIBC1_ARATH	temperature	sp|Q9LKJ1|HIBC1_ARATH 3-hydroxyisobutyryl-CoA hydrolase 1 OS=Arabidopsis thaliana GN=CHY1 PE=1 SV=1
SRS1594	RAA5C_ARATH	temperature	sp|P28187|RAA5C_ARATH Ras-related protein RABA5c OS=Arabidopsis thaliana GN=RABA5C PE=1 SV=1
SRS1646	MYB4_ORYSJ	temperature	sp|Q7XBH4|MYB4_ORYSJ Myb-related protein Myb4 OS=Oryza sativa subsp. japonica GN=MYB4 PE=2 SV=2
SRS1705	VTI11_ARATH	temperature	sp|Q9SEL6|VTI11_ARATH Vesicle transport v-SNARE 11 OS=Arabidopsis thaliana GN=VTI11 PE=1 SV=2
SRS1706	CLPB3_ARATH	temperature	sp|Q9LF37|CLPB3_ARATH Chaperone protein ClpB3, chloroplastic OS=Arabidopsis thaliana GN=CLPB3 PE=2 SV=1
SRS1722	TRXH3_ARATH	temperature	sp|Q42403|TRXH3_ARATH Thioredoxin H3 OS=Arabidopsis thaliana GN=TRX3 PE=1 SV=1
SRS1756	RFS5_ARATH	temperature	sp|Q9FND9|RFS5_ARATH Probable galactinol--sucrose galactosyltransferase 5 OS=Arabidopsis thaliana GN=RFS5 PE=1 SV=1
SRS1929	MD37E_ARATH	temperature	sp|P22953|MD37E_ARATH Probable mediator of RNA polymerase II transcription subunit 37e OS=Arabidopsis thaliana GN=MED37E PE=1 SV=3
SRS1934	HS23M_ARATH	temperature	sp|Q96331|HS23M_ARATH 23.6 kDa heat shock protein, mitochondrial OS=Arabidopsis thaliana GN=HSP23.6 PE=2 SV=1
SRS1989	MD37C_ARATH	temperature	sp|Q9LHA8|MD37C_ARATH Probable mediator of RNA polymerase II transcription subunit 37c OS=Arabidopsis thaliana GN=MED37C PE=1 SV=1
SRS1993	HSP7F_ARATH	temperature	sp|Q9STW6|HSP7F_ARATH Heat shock 70 kDa protein 6, chloroplastic OS=Arabidopsis thaliana GN=HSP70-6 PE=1 SV=1
SRS2016	GRP_HORVU	temperature	sp|Q43472|GRP_HORVU Glycine-rich RNA-binding protein blt801 OS=Hordeum vulgare GN=blt801 PE=1 SV=1
SRS2067	RAA5C_ARATH	temperature	sp|P28187|RAA5C_ARATH Ras-related protein RABA5c OS=Arabidopsis thaliana GN=RABA5C PE=1 SV=1
SRS2088	GRP_HORVU	temperature	sp|Q43472|GRP_HORVU Glycine-rich RNA-binding protein blt801 OS=Hordeum vulgare GN=blt801 PE=1 SV=1
SRS2101	HFB4B_ORYSJ	temperature	sp|Q7XHZ0|HFB4B_ORYSJ Heat stress transcription factor B-4b OS=Oryza sativa subsp. japonica GN=HSFB4B PE=2 SV=1
SRS2115	GRP_HORVU	temperature	sp|Q43472|GRP_HORVU Glycine-rich RNA-binding protein blt801 OS=Hordeum vulgare GN=blt801 PE=1 SV=1
SRS2119	HFA2C_ORYSJ	temperature	sp|Q338B0|HFA2C_ORYSJ Heat stress transcription factor A-2c OS=Oryza sativa subsp. japonica GN=HSFA2C PE=2 SV=2
SRS2132	MPK4_ARATH	temperature	sp|Q39024|MPK4_ARATH Mitogen-activated protein kinase 4 OS=Arabidopsis thaliana GN=MPK4 PE=1 SV=2
SRS2149	GRP_HORVU	temperature	sp|Q43472|GRP_HORVU Glycine-rich RNA-binding protein blt801 OS=Hordeum vulgare GN=blt801 PE=1 SV=1
SRS2186	CH60A_ARATH	temperature	sp|P29197|CH60A_ARATH Chaperonin CPN60, mitochondrial OS=Arabidopsis thaliana GN=CPN60 PE=1 SV=2
SRS2217	RAA5C_ARATH	temperature	sp|P28187|RAA5C_ARATH Ras-related protein RABA5c OS=Arabidopsis thaliana GN=RABA5C PE=1 SV=1
SRS2254	HFB4B_ORYSJ	temperature	sp|Q7XHZ0|HFB4B_ORYSJ Heat stress transcription factor B-4b OS=Oryza sativa subsp. japonica GN=HSFB4B PE=2 SV=1
SRS2307	DNJH_CUCSA	temperature	sp|Q04960|DNJH_CUCSA DnaJ protein homolog OS=Cucumis sativus GN=DNAJ1 PE=2 SV=1
SRS2348	DNJH_CUCSA	temperature	sp|Q04960|DNJH_CUCSA DnaJ protein homolog OS=Cucumis sativus GN=DNAJ1 PE=2 SV=1
SRS2369	DNJH_CUCSA	temperature	sp|Q04960|DNJH_CUCSA DnaJ protein homolog OS=Cucumis sativus GN=DNAJ1 PE=2 SV=1
SRS2372	14336_ARATH	temperature	sp|P48349|14336_ARATH 14-3-3-like protein GF14 lambda OS=Arabidopsis thaliana GN=GRF6 PE=1 SV=1
SRS2444	DNJH_CUCSA	temperature	sp|Q04960|DNJH_CUCSA DnaJ protein homolog OS=Cucumis sativus GN=DNAJ1 PE=2 SV=1
CO000311	SOT16_ARATH	wounding	sp|Q9C9D0|SOT16_ARATH Cytosolic sulfotransferase 16 OS=Arabidopsis thaliana GN=SOT16 PE=1 SV=1
CO000217	BI1_ARATH	wounding	sp|Q9LD45|BI1_ARATH Bax inhibitor 1 OS=Arabidopsis thaliana GN=BI-1 PE=1 SV=1
CO000083	PRS2_SOLTU	wounding	sp|P17642|PRS2_SOLTU Pathogenesis-related protein STH-2 OS=Solanum tuberosum GN=STH-2 PE=2 SV=1
CO000220	PRS2_SOLTU	wounding	sp|P17642|PRS2_SOLTU Pathogenesis-related protein STH-2 OS=Solanum tuberosum GN=STH-2 PE=2 SV=1
CO000065	SOT16_ARATH	wounding	sp|Q9C9D0|SOT16_ARATH Cytosolic sulfotransferase 16 OS=Arabidopsis thaliana GN=SOT16 PE=1 SV=1
CO000233	VSP1_ARATH	wounding	sp|O49195|VSP1_ARATH Vegetative storage protein 1 OS=Arabidopsis thaliana GN=VSP1 PE=2 SV=2
CO000159	NRT31_ARATH	wounding	sp|Q9FGS5|NRT31_ARATH High-affinity nitrate transporter 3.1 OS=Arabidopsis thaliana GN=NRT3.1 PE=1 SV=1
CO000318	PRS2_SOLTU	wounding	sp|P17642|PRS2_SOLTU Pathogenesis-related protein STH-2 OS=Solanum tuberosum GN=STH-2 PE=2 SV=1
CO000013	PRS2_SOLTU	wounding	sp|P17642|PRS2_SOLTU Pathogenesis-related protein STH-2 OS=Solanum tuberosum GN=STH-2 PE=2 SV=1
CO000145	JMT_ARATH	wounding	sp|Q9AR07|JMT_ARATH Jasmonate O-methyltransferase OS=Arabidopsis thaliana GN=JMT PE=1 SV=3
CO000348	ADHX_ARATH	wounding	sp|Q96533|ADHX_ARATH Alcohol dehydrogenase class-3 OS=Arabidopsis thaliana GN=ADH2 PE=1 SV=2
CO000323	PRS2_SOLTU	wounding	sp|P17642|PRS2_SOLTU Pathogenesis-related protein STH-2 OS=Solanum tuberosum GN=STH-2 PE=2 SV=1
SRS0185	SOT16_ARATH	wounding	sp|Q9C9D0|SOT16_ARATH Cytosolic sulfotransferase 16 OS=Arabidopsis thaliana GN=SOT16 PE=1 SV=1
SRS0233	PERN1_TOBAC	wounding	sp|Q9XIV8|PERN1_TOBAC Peroxidase N1 OS=Nicotiana tabacum GN=poxN1 PE=1 SV=1
SRS0272	PERN1_TOBAC	wounding	sp|Q9XIV8|PERN1_TOBAC Peroxidase N1 OS=Nicotiana tabacum GN=poxN1 PE=1 SV=1
SRS0354	JMT_ARATH	wounding	sp|Q9AR07|JMT_ARATH Jasmonate O-methyltransferase OS=Arabidopsis thaliana GN=JMT PE=1 SV=3
SRS0434	ADHX_ARATH	wounding	sp|Q96533|ADHX_ARATH Alcohol dehydrogenase class-3 OS=Arabidopsis thaliana GN=ADH2 PE=1 SV=2
SRS0621	SOT16_ARATH	wounding	sp|Q9C9D0|SOT16_ARATH Cytosolic sulfotransferase 16 OS=Arabidopsis thaliana GN=SOT16 PE=1 SV=1
SRS1146	PERK1_ARATH	wounding	sp|Q9LV48|PERK1_ARATH Proline-rich receptor-like protein kinase PERK1 OS=Arabidopsis thaliana GN=PERK1 PE=1 SV=1
SRS1288	VSP2_ARATH	wounding	sp|O82122|VSP2_ARATH Vegetative storage protein 2 OS=Arabidopsis thaliana GN=VSP2 PE=1 SV=1
SRS1349	AOC2_ARATH	wounding	sp|Q9LS02|AOC2_ARATH Allene oxide cyclase 2, chloroplastic OS=Arabidopsis thaliana GN=AOC2 PE=1 SV=1
SRS1649	PLA12_ARATH	wounding	sp|Q9MA46|PLA12_ARATH Galactolipase DONGLE, chloroplastic OS=Arabidopsis thaliana GN=DGL PE=1 SV=1
SRS1665	ILL4_ARATH	wounding	sp|O04373|ILL4_ARATH IAA-amino acid hydrolase ILR1-like 4 OS=Arabidopsis thaliana GN=ILL4 PE=1 SV=2
SRS1822	PERK1_ARATH	wounding	sp|Q9LV48|PERK1_ARATH Proline-rich receptor-like protein kinase PERK1 OS=Arabidopsis thaliana GN=PERK1 PE=1 SV=1
SRS1932	PERK1_ARATH	wounding	sp|Q9LV48|PERK1_ARATH Proline-rich receptor-like protein kinase PERK1 OS=Arabidopsis thaliana GN=PERK1 PE=1 SV=1
SRS2029	PERK1_ARATH	wounding	sp|Q9LV48|PERK1_ARATH Proline-rich receptor-like protein kinase PERK1 OS=Arabidopsis thaliana GN=PERK1 PE=1 SV=1
SRS2055	PERK1_ARATH	wounding	sp|Q9LV48|PERK1_ARATH Proline-rich receptor-like protein kinase PERK1 OS=Arabidopsis thaliana GN=PERK1 PE=1 SV=1
SRS2110	NRT31_ARATH	wounding	sp|Q9FGS5|NRT31_ARATH High-affinity nitrate transporter 3.1 OS=Arabidopsis thaliana GN=NRT3.1 PE=1 SV=1
SRS2225	OPR7_ORYSJ	wounding	sp|Q6Z965|OPR7_ORYSJ 12-oxophytodienoate reductase 7 OS=Oryza sativa subsp. japonica GN=OPR7 PE=2 SV=1
SRS2238	PLA12_ARATH	wounding	sp|Q9MA46|PLA12_ARATH Galactolipase DONGLE, chloroplastic OS=Arabidopsis thaliana GN=DGL PE=1 SV=1
SRS2251	SOT16_ARATH	wounding	sp|Q9C9D0|SOT16_ARATH Cytosolic sulfotransferase 16 OS=Arabidopsis thaliana GN=SOT16 PE=1 SV=1
SRS2308	ACCO4_ARATH	wounding	sp|Q06588|ACCO4_ARATH 1-aminocyclopropane-1-carboxylate oxidase 4 OS=Arabidopsis thaliana GN=ACO4 PE=2 SV=2
SRS2331	BI1_ARATH	wounding	sp|Q9LD45|BI1_ARATH Bax inhibitor 1 OS=Arabidopsis thaliana GN=BI-1 PE=1 SV=1
SRS2334	ERF5_TOBAC	wounding	sp|Q40478|ERF5_TOBAC Ethylene-responsive transcription factor 5 OS=Nicotiana tabacum GN=ERF5 PE=2 SV=1
SRS2401	PLCD1_ARATH	wounding	sp|Q39032|PLCD1_ARATH Phosphoinositide phospholipase C 1 OS=Arabidopsis thaliana GN=PLC1 PE=2 SV=1
SRS2410	TLP1_PRUPE	wounding	sp|P83332|TLP1_PRUPE Thaumatin-like protein 1 OS=Prunus persica PE=2 SV=1
SRS2458	ADHX_ARATH	wounding	sp|Q96533|ADHX_ARATH Alcohol dehydrogenase class-3 OS=Arabidopsis thaliana GN=ADH2 PE=1 SV=2
SRS2464	PERK1_ARATH	wounding	sp|Q9LV48|PERK1_ARATH Proline-rich receptor-like protein kinase PERK1 OS=Arabidopsis thaliana GN=PERK1 PE=1 SV=1
